# Supplementary material
Source: Elsevier journal article supplement (https://cris.unibo.it/retrieve/e6024bc0-c543-4127-9205-90a877dd4bb8/mmc1.zip)

# THE LANCET

## Public Health

### **Supplementary appendix 2**

This appendix formed part of the original submission and has been peer reviewed.  
We post it as supplied by the authors.

Supplement to: GBD 2021 Italy Subnational Burden of Disease Collaborators. State of health and inequalities among Italian regions from 2000 to 2021: a systematic analysis based on the Global Burden of Disease Study 2021. *Lancet Public Health* 2025; **10**: e309–20.

## Supplementary Appendix

### Contents

|                                                                                                                                                       |    |
|-------------------------------------------------------------------------------------------------------------------------------------------------------|----|
| Figure S1. Trends of Health-Adjusted Life Expectancy at birth (HALE) by region between 2000 and 2021 for females (a) and males (b) .....              | 2  |
| Figure S2. Trends of all-age Years Lived with Disability (YLDs) by region in Italy between 2000 and 2021 for females (a) and males (b) .....          | 3  |
| Figure S3. Leading causes of all-age Years Lived with Disability (YLDs) in Italy in 2000 and 2019 – Both sexes .....                                  | 4  |
| Figure S4a. Leading causes of all-age Years Lived with Disability (YLDs) in Italy in 2000 and 2019 – Males .....                                      | 5  |
| Figure S4b. Leading causes of all-age Years Lived with Disability (YLDs) in Italy in 2000 and 2019 – Females .....                                    | 6  |
| Figure S5. Trends of age-standardised Years Lived with Disability (YLDs) by region in Italy between 2000 and 2021 for females (a) and males (b) ..... | 7  |
| Figure S6. Leading causes of age-standardised Years Lived with Disability (YLDs) in Italy in 2000 and 2019 – Both sexes .....                         | 8  |
| Figure S7a. Leading causes of age-standardised Years Lived with Disability (YLDs) in Italy in 2000 and 2019 – Males .....                             | 9  |
| Figure S7b. Leading causes of age-standardised Years Lived with Disability (YLDs) in Italy in 2000 and 2019 – Females .....                           | 10 |
| Figure S8. Ten leading causes of age-standardised Years Lived with Disability (YLDs) in 2019 in Italy and in the five macro-regions .....             | 11 |
| Table S1. Ten leading causes of all-age Years Lived with Disability (YLDs) in 2019 by region .....                                                    | 12 |
| Table S2. Ten leading causes of age-standardised Years Lived with Disability (YLDs) in 2019 by region .....                                           | 20 |
| Figure S9. Trends of all-age Years of Life Lost (YLLs) by region in Italy between 2000 and 2021 for females (a) and males (b) .....                   | 28 |
| Figure S10. Leading causes of all-age Years of Life Lost (YLLs) in Italy in 2000 and 2019 – Both sexes .....                                          | 29 |
| Figure S11a. Leading causes of all-age Years of Life Lost (YLLs) in Italy in 2000 and 2019 – Males .....                                              | 30 |
| Figure S11b. Leading causes of all-age Years of Life Lost (YLLs) in Italy in 2000 and 2019 – Females .....                                            | 31 |
| Figure S12. Trends of age-standardised Years of Life Lost (YLLs) by region in Italy between 2000 and 2021 for females (a) and males (b) .....         | 32 |
| Figure S13. Leading causes of age-standardised Years of Life Lost (YLLs) in Italy in 2000 and 2019 – Both sexes .....                                 | 33 |
| Figure S14a. Leading causes of age-standardised Years of Life Lost (YLLs) in Italy in 2000 and 2019 – Males .....                                     | 34 |
| Figure S14b. Leading causes of age-standardised Years of Life Lost (YLLs) in Italy in 2000 and 2019 – Females .....                                   | 35 |
| Figure S15. Ten leading causes of age-standardised Years of Life Lost (YLLs) in 2019 in Italy and in the five macro-regions .....                     | 36 |
| Table S3. Ten leading causes of all-age Years Lived with Disability (YLDs) in 2019 by region .....                                                    | 37 |
| Table S4. Ten leading causes of age-standardised Years Lived with Disability (YLDs) in 2019 by region .....                                           | 45 |
| Figure S16. Trends of all-age Years of Life Lost (YLLs) by region in Italy between 2000 and 2021 for females (a) and males (b) .....                  | 53 |
| Figure S17. Ten leading causes of all-age Disability-Adjusted Life-Years (DALYs) in 2019 in Italy and the five macro-regions .....                    | 54 |
| Figure S18. Leading causes of all-age Disability-Adjusted Life-Years (DALYs) in Italy in 2000 and 2019 – Both sexes .....                             | 55 |
| Figure S19a. Leading causes of all-age Disability-Adjusted Life-Years (DALYs) in Italy in 2000 and 2019 – Males .....                                 | 56 |
| Figure S19b. Leading causes of all-age Disability-Adjusted Life-Years (DALYs) in Italy in 2000 and 2019 – Females .....                               | 57 |
| Figure S20. Trends of all-age Years of Life Lost (YLLs) by region in Italy between 2000 and 2021 for females (a) and males (b) .....                  | 58 |
| Figure S21. Leading causes of age-standardised Disability-Adjusted Life-Years (DALYs) in Italy in 2000 and 2019 – Both sexes .....                    | 59 |
| Figure S22a. Leading causes of age-standardised Disability-Adjusted Life-Years (DALYs) in Italy in 2000 and 2019 – Males .....                        | 60 |
| Figure S22b. Leading causes of age-standardised Disability-Adjusted Life-Years (DALYs) in Italy in 2000 and 2019 – Females .....                      | 61 |
| Figure S23. Ten leading causes of age-standardised Disability-Adjusted Life-Years (DALYs) in 2019 in Italy and in the five macro-regions .....        | 62 |
| Table S5. Ten leading causes of all-age Disability-Adjusted Life-Years (DALYs) in 2019 by region .....                                                | 63 |
| Table S6. Ten leading causes of age-standardised Disability-Adjusted Life-Years (DALYs) in 2019 by region .....                                       | 71 |
| Figure S24. Percentage of family health expenditure over total health expenditure in Italy by region and macro-region from 2000 to 2019 .....         | 79 |

Figure S1. Trends of Health-Adjusted Life Expectancy at birth (HALE) by region in Italy between 2000 and 2021 for females (a) and males (b).

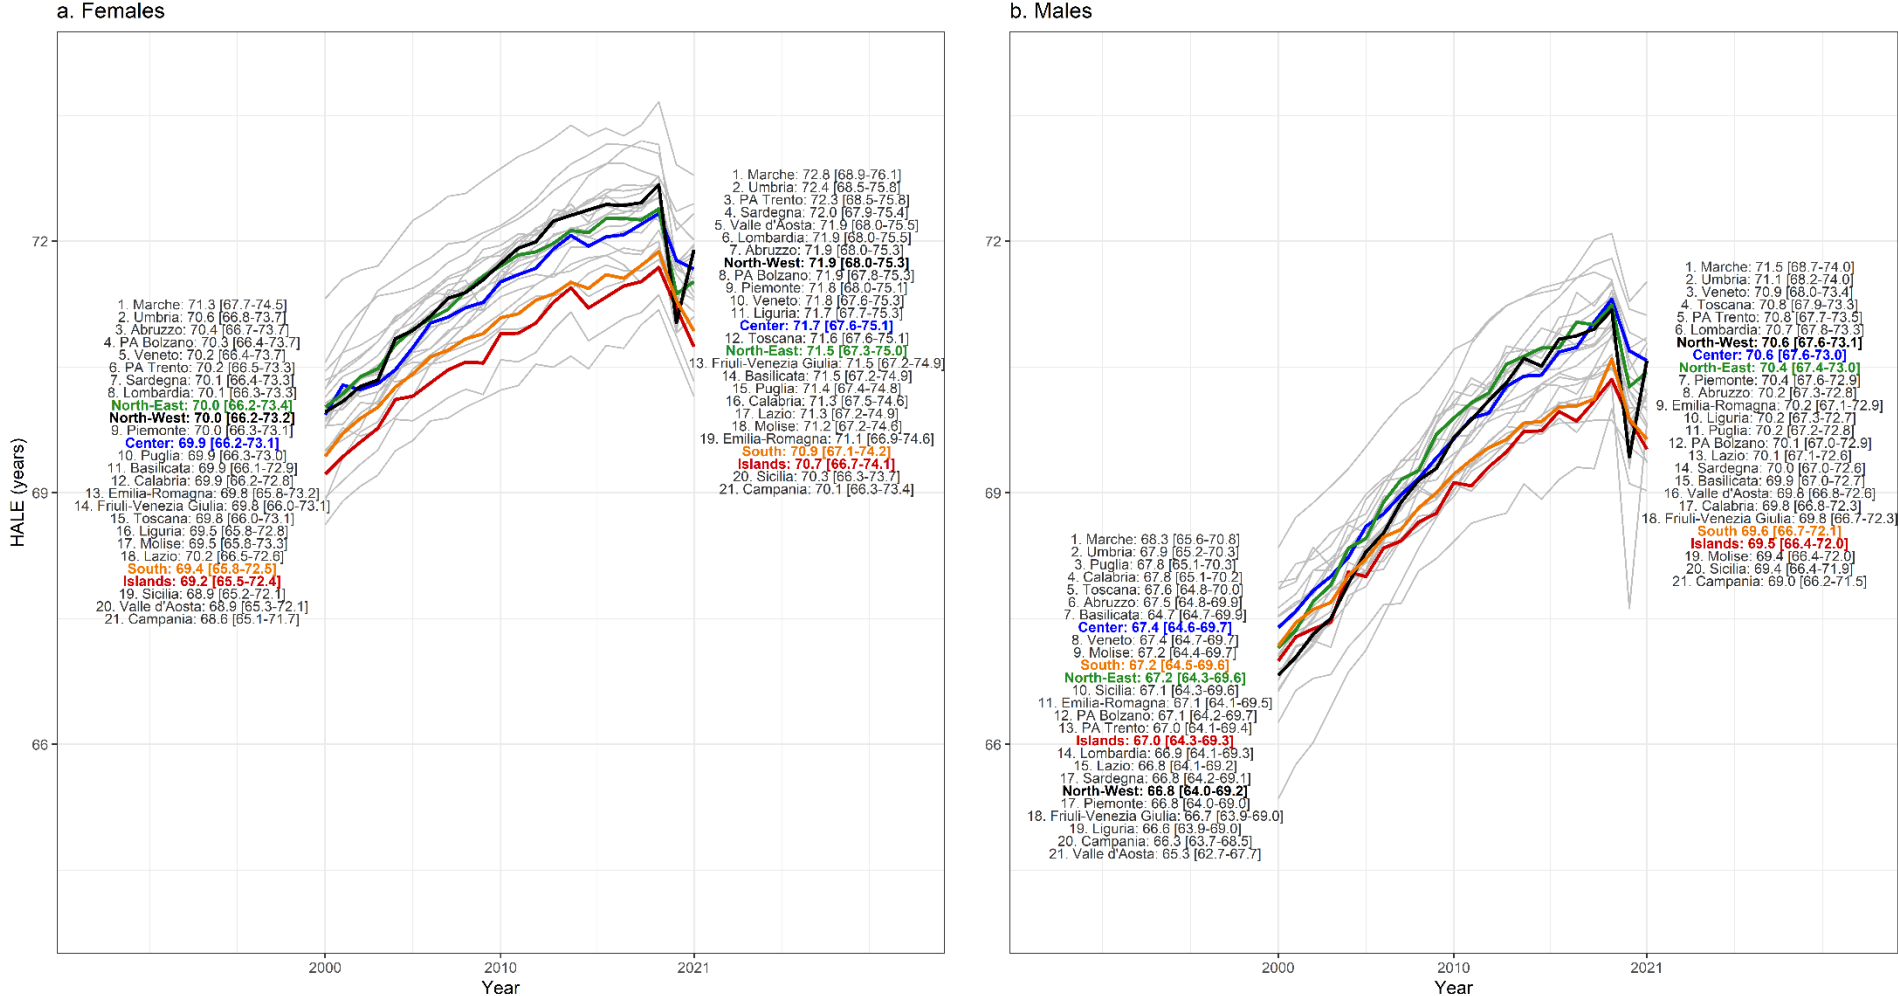

Figure S2. Trends of all-age Years Lived with Disability (YLDs) by region in Italy between 2000 and 2021 for females (a) and males (b).

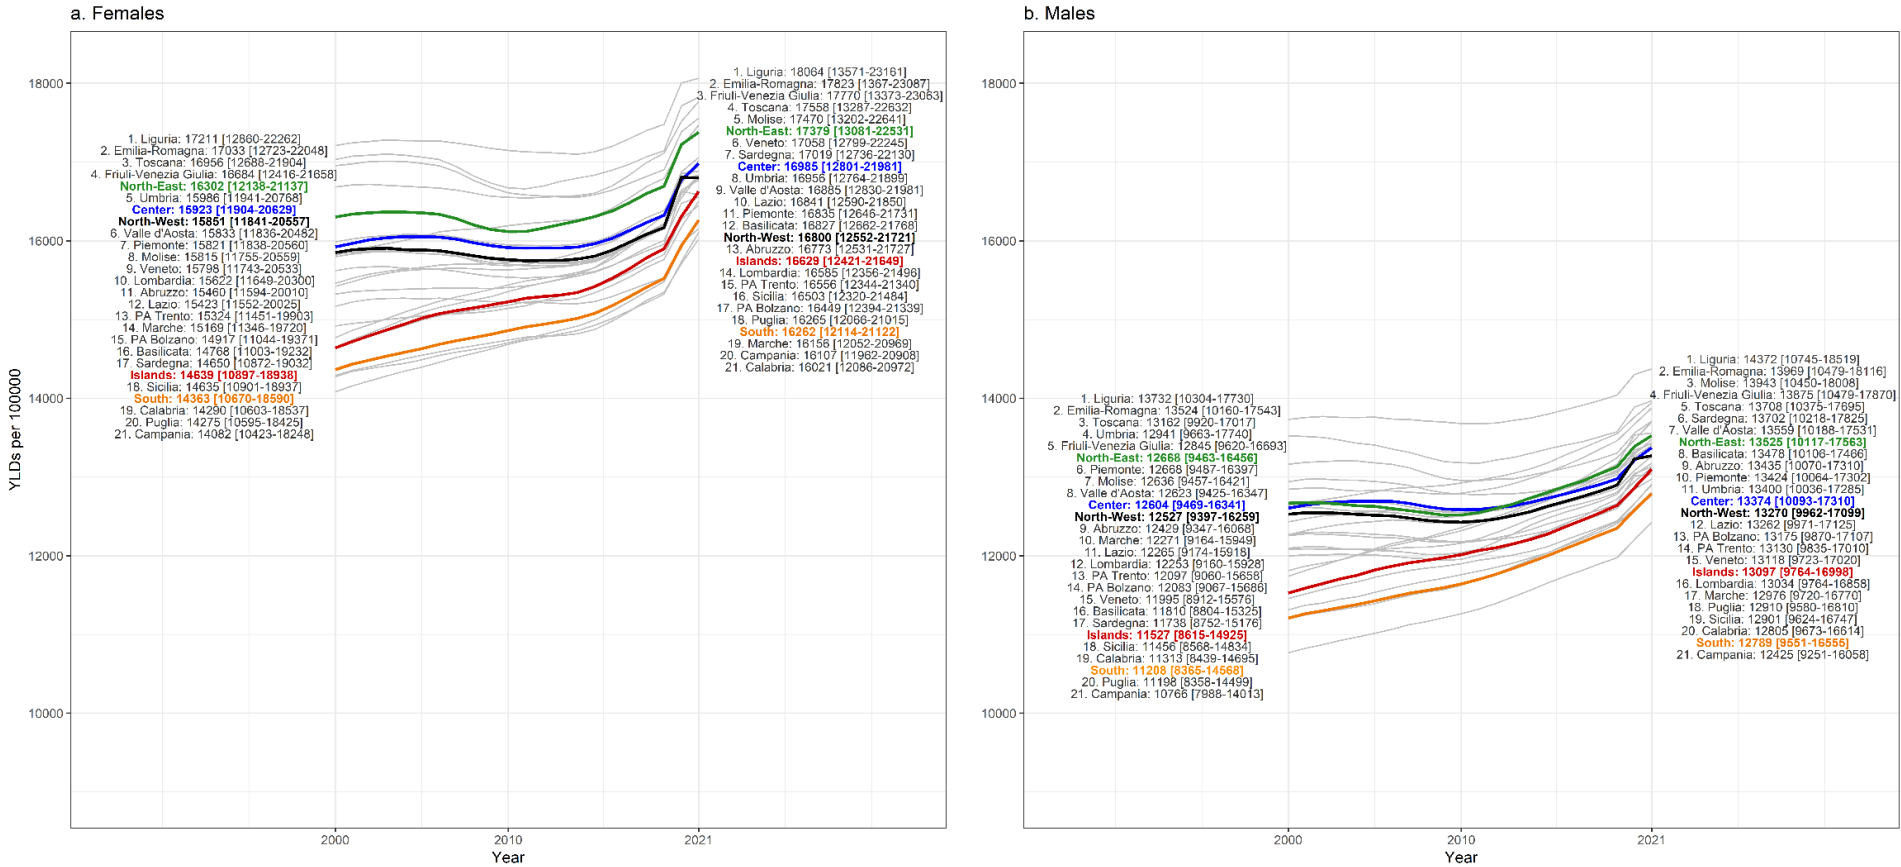

Figure S3. Leading causes of all-age Years Lived with Disability (YLDs) in Italy in 2000 and 2019 – Both sexes.

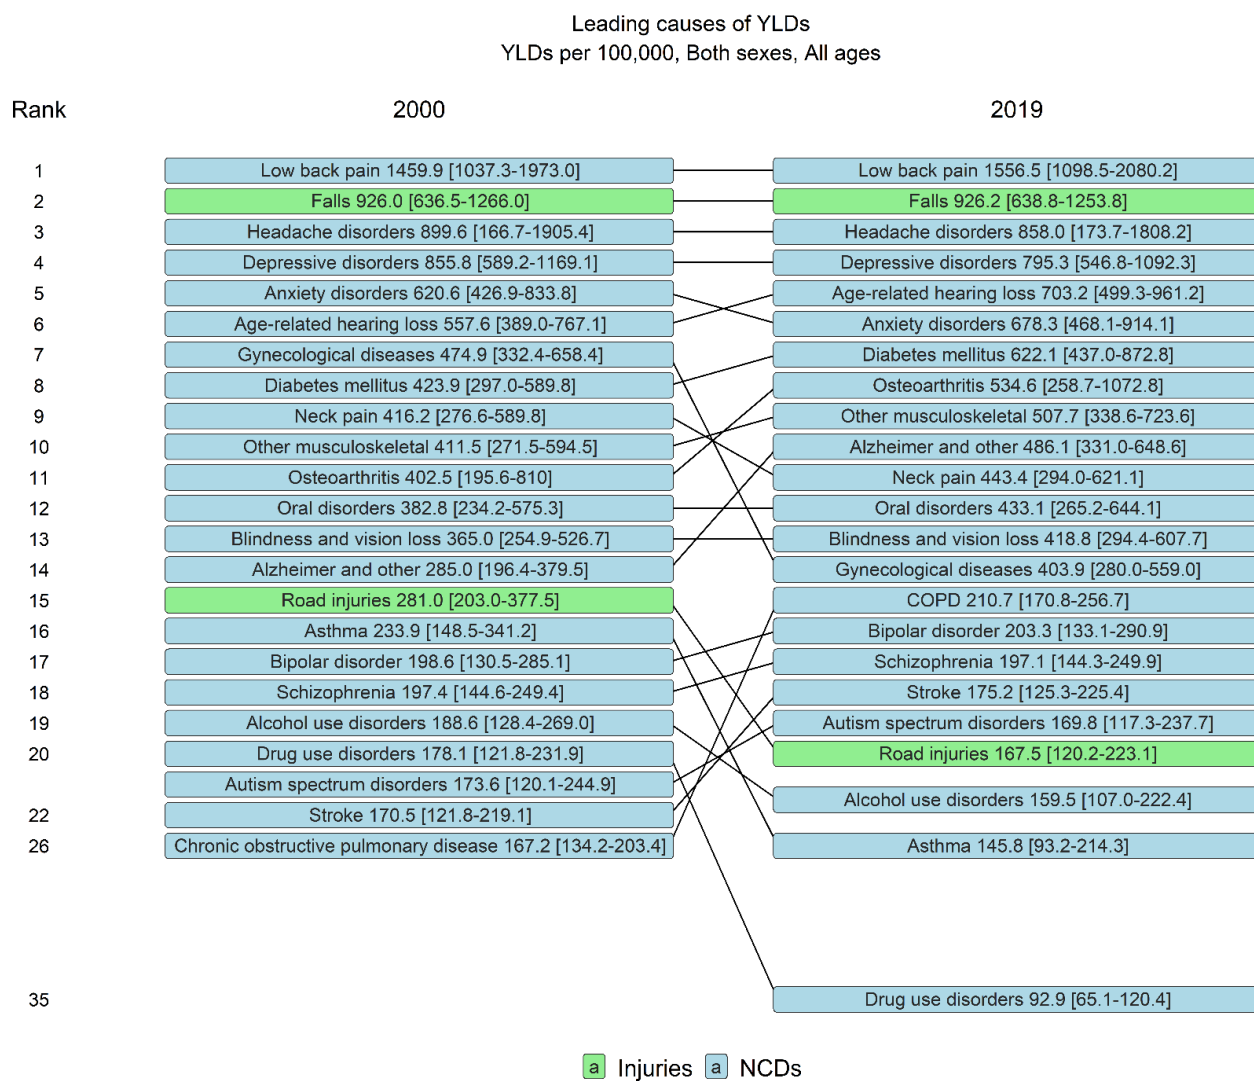

Abbreviations: COPD: Chronic Obstructive Pulmonary Disease; NCDs: Non-Communicable Diseases.

Figure S4a. Leading causes of all-age Years Lived with Disability (YLDs) in Italy in 2000 and 2019 – Males.

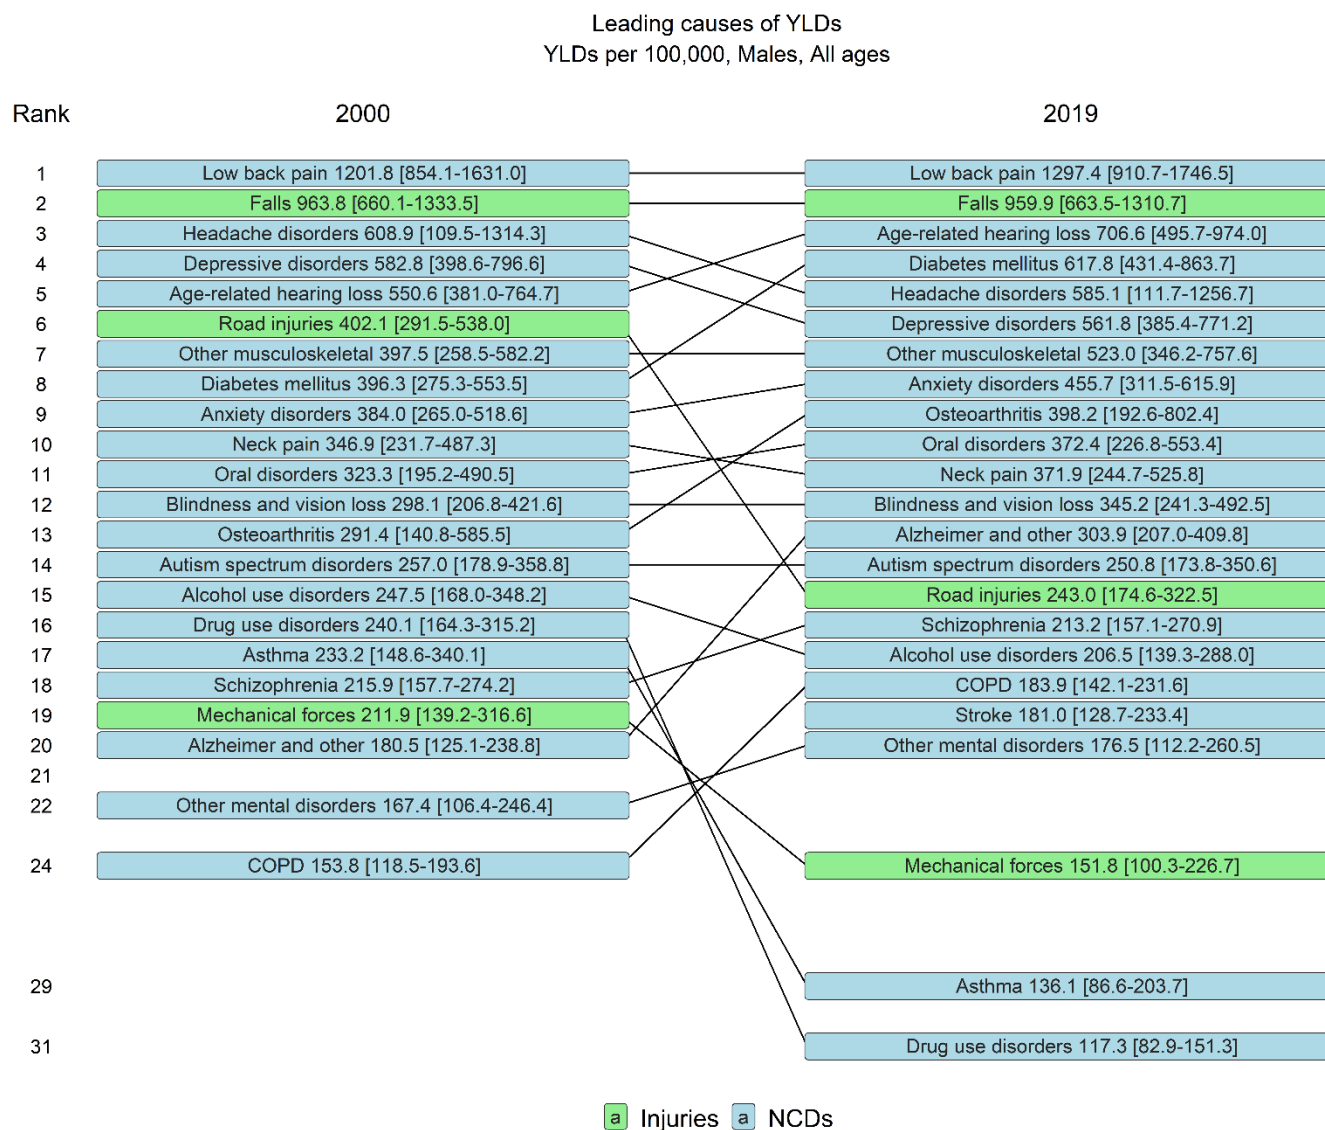

Abbreviations: COPD: Chronic Obstructive Pulmonary Disease; NCDs: Non-Communicable Diseases.

Figure S4b. Leading causes of all-age Years Lived with Disability (YLDs) in Italy in 2000 and 2019 – Females.

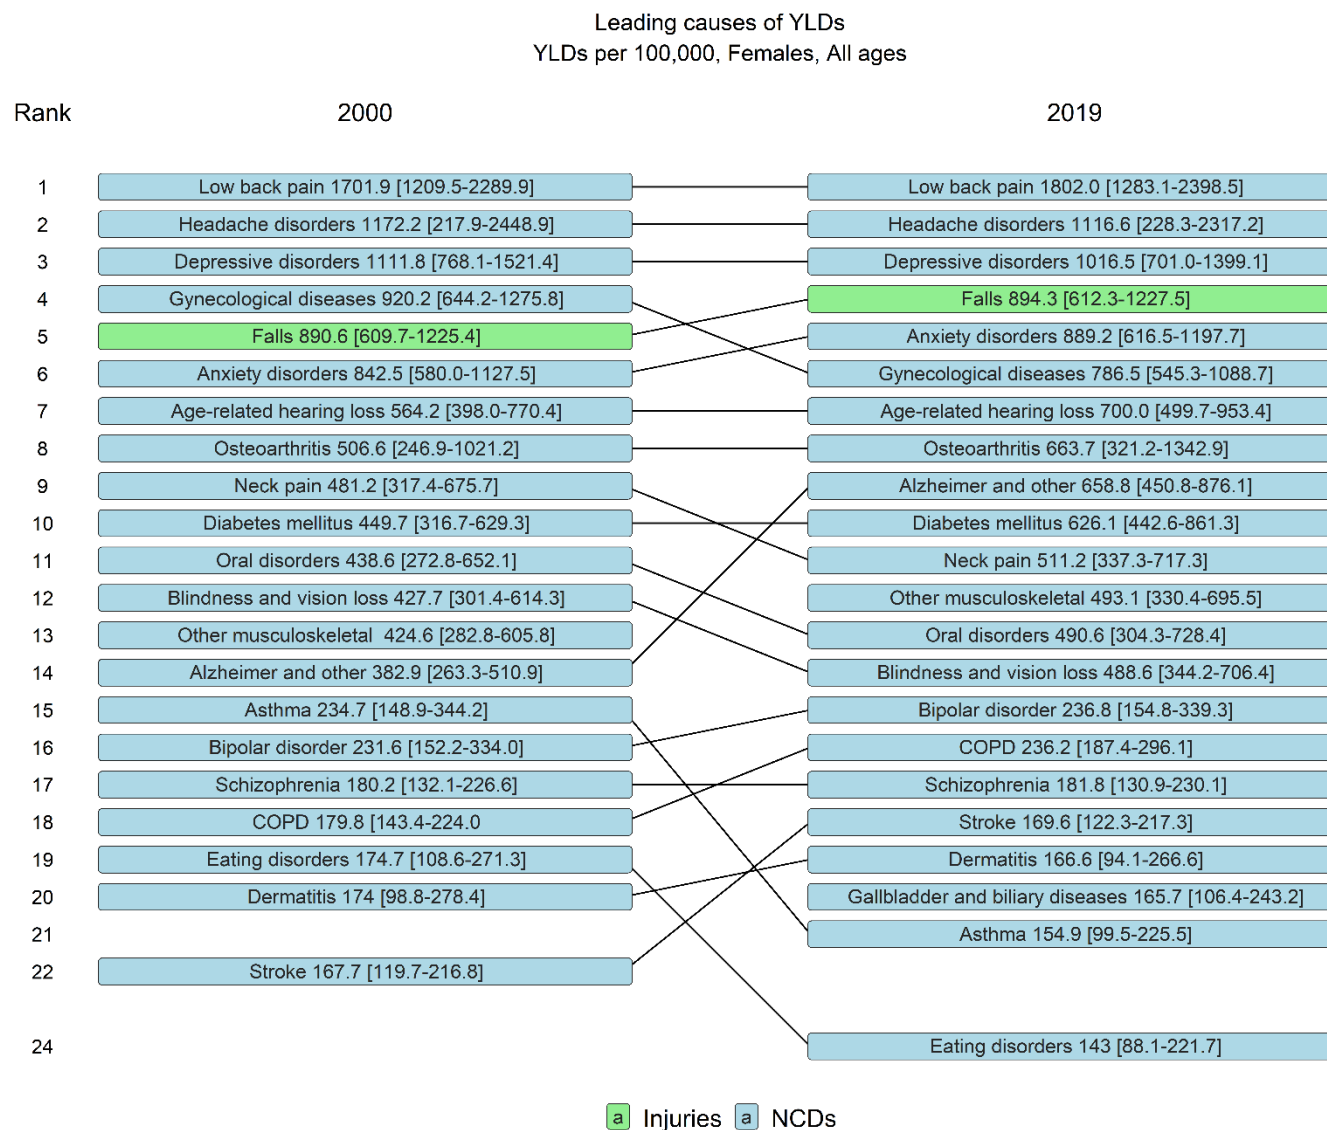

Abbreviations: COPD: Chronic Obstructive Pulmonary Disease; NCDs: Non-Communicable Diseases.

Figure S5. Trends of age-standardised Years Lived with Disability (YLDs) by region in Italy between 2000 and 2021 for females (a) and males (b).

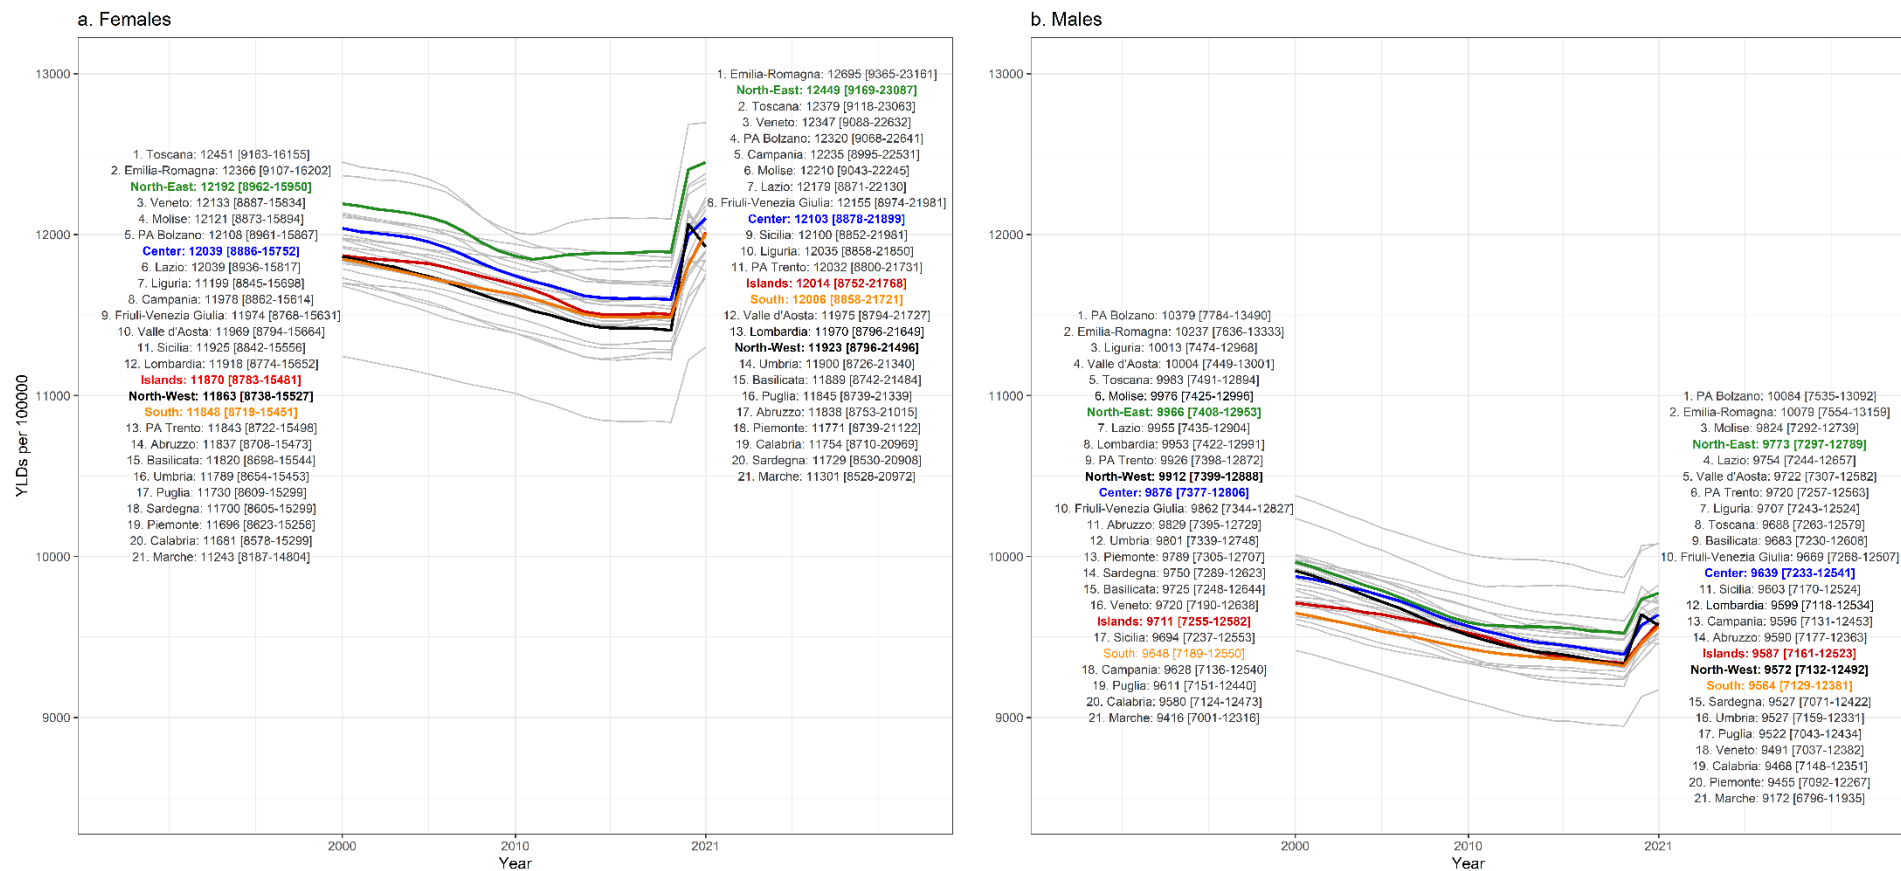

Figure S6. Leading causes of age-standardised Years Lived with Disability (YLDs) in Italy in 2000 and 2019 – Both sexes.

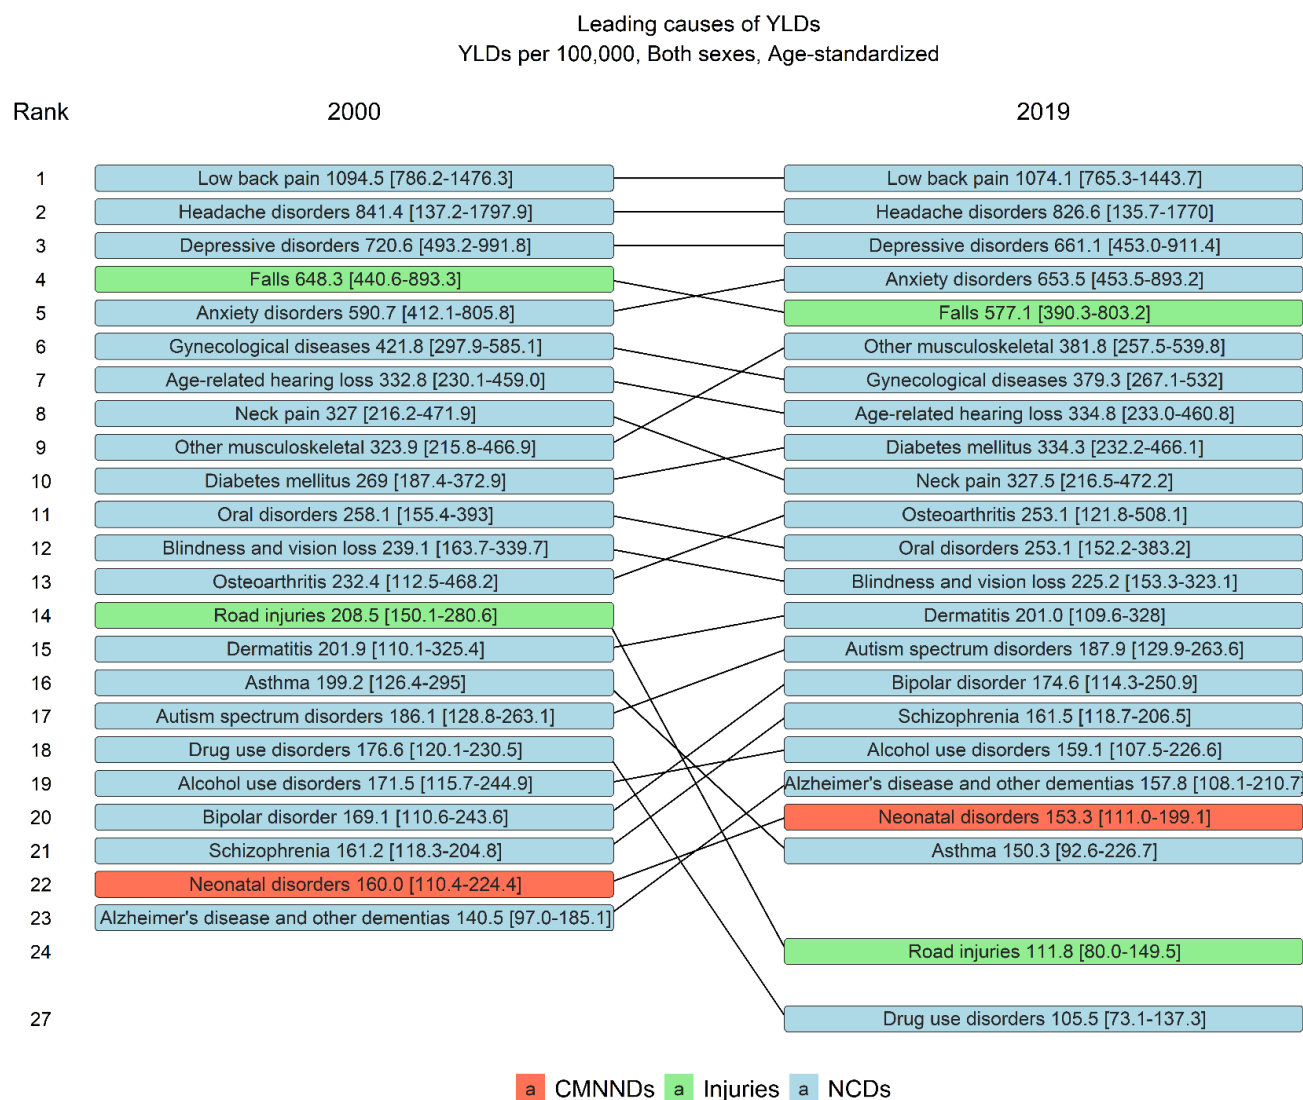

Abbreviations: CMNNDs: Communicable, Maternal, Neonatal and Nutritional Diseases; NCDs: Non-Communicable Diseases.

Figure S7a. Leading causes of age-standardised Years Lived with Disability (YLDs) in Italy in 2000 and 2019 - Males.

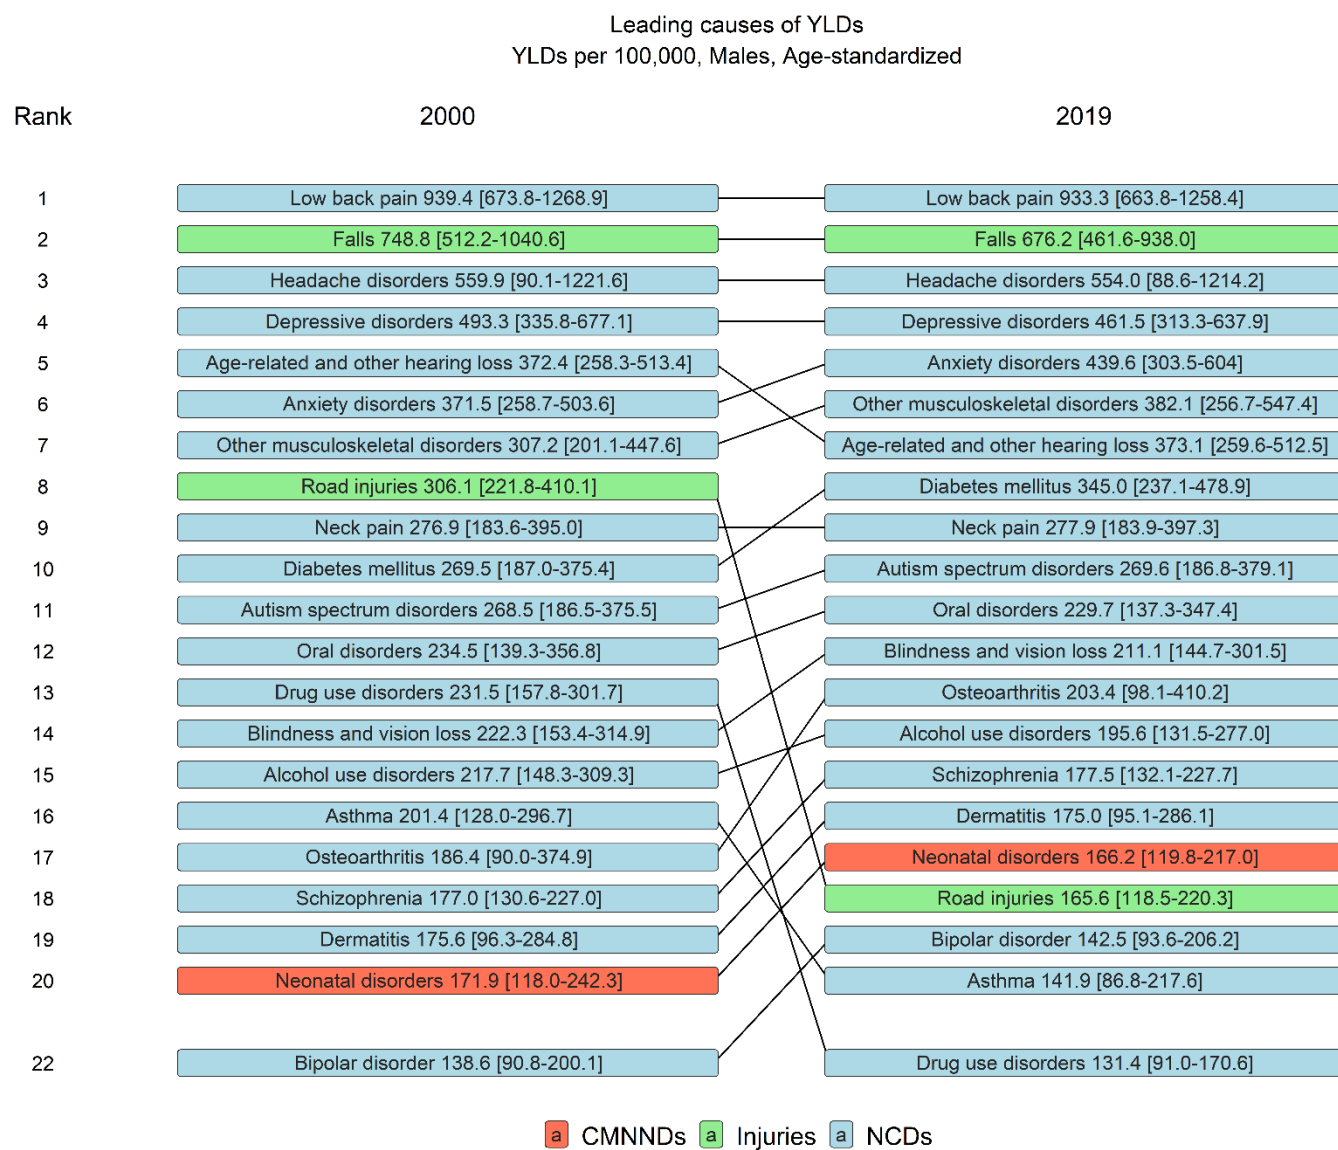

Abbreviations: CLDs: Chronic Liver Diseases; COPD: Chronic Obstructive Pulmonary Disease; CMNNDs: Communicable, Maternal, Neonatal and Nutritional Diseases; NCDs: Non-Communicable Diseases.

Figure S7b. Leading causes of age-standardised Years Lived with Disability (YLDs) in Italy in 2000 and 2019 - Females.

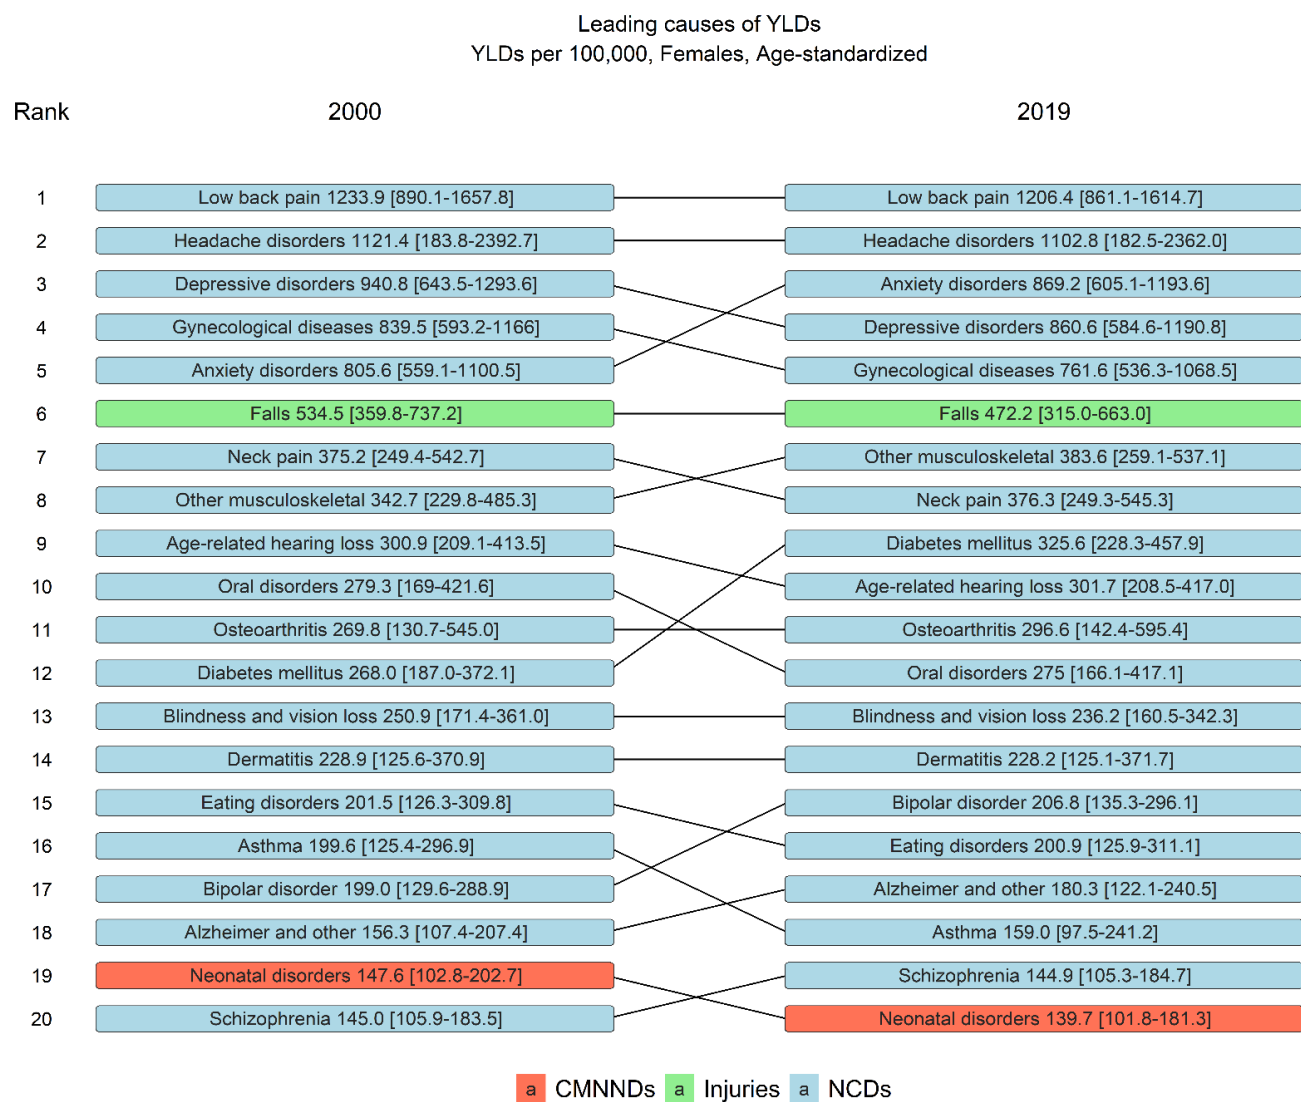

Abbreviations: CLDs: Chronic Liver Diseases; COPD: Chronic Obstructive Pulmonary Disease; CMNNDs: Communicable, Maternal, Neonatal and Nutritional Diseases; NCDs: Non-Communicable Diseases.

Figure S8. Ten leading causes of age-standardised Years Lived with Disability (YLDs) in 2019 in Italy and in the five macro-regions. Rate are expressed per 100,000 people.

| Italy     |                          |                       |                          |                          | North-West |                          |                       |                          |                          |
|-----------|--------------------------|-----------------------|--------------------------|--------------------------|------------|--------------------------|-----------------------|--------------------------|--------------------------|
| Rank 2019 | Cause                    | YLD rate (95% UI)     | Change from 2000 to 2019 | Change from 2019 to 2021 | Rank 2019  | Cause                    | YLD rate (95% UI)     | Change from 2000 to 2019 | Change from 2019 to 2021 |
| 1         | Low back pain            | 1074.1 (165.3-1443.7) | -1.9%                    | 0.7%                     | 1          | Low back pain            | 1083.2 (774.3-1457.5) | -1.8%                    | 0.7%                     |
| 2         | Headache disorders       | 826.6 (1375.7-1770.0) | -1.8%                    | -4.0%                    | 2          | Headache disorders       | 841.8 (139.5-1812.5)  | -1.7%                    | -4.0%                    |
| 3         | Depressive disorders     | 661.1 (453.0-911.4)   | -8.3%                    | 25.1%                    | 3          | Anxiety disorders        | 657.4 (456.3-895.6)   | 11.4%                    | 25.1%                    |
| 4         | Anxiety disorders        | 653.5 (453.5-893.2)   | 10.7%                    | -0.4%                    | 4          | Falls                    | 616.9 (416.1-861.4)   | -12.5%                   | -0.4%                    |
| 5         | Falls                    | 577.1 (390.3-803.2)   | -11.0%                   | 24.3%                    | 5          | Depressive disorders     | 606.7 (418.7-836.9)   | -9.5%                    | 24.3%                    |
| 6         | Other musculoskeletal    | 381.8 (257.5-539.8)   | 17.9%                    | 3.5%                     | 6          | Other musculoskeletal    | 385.7 (261-545.2)     | 20.7%                    | 3.5%                     |
| 7         | Gynecological diseases   | 379.3 (267.1-532.0)   | -10.1%                   | -0.6%                    | 7          | Gynecological diseases   | 348.7 (242.3-490.1)   | -10.0%                   | -0.6%                    |
| 8         | Age-related hearing loss | 334.8 (233.0-460.8)   | 0.6%                     | 0.0%                     | 8          | Age-related hearing loss | 335.4 (233.2-462)     | 0.9%                     | 0.0%                     |
| 9         | Diabetes mellitus        | 334.3 (232.2-466.1)   | 24.3%                    | -0.2%                    | 9          | Neck pain                | 327.7 (215.3-471.3)   | 0.3%                     | -0.2%                    |
| 10        | Neck pain                | 327.5 (216.5-472.2)   | 0.2%                     | 0.3%                     | 10         | Osteoarthritis           | 254.6 (122.4-509.3)   | 9.0%                     | 0.3%                     |

  

| North-East |                          |                       |                          |                          | Center    |                          |                       |                          |                          |
|------------|--------------------------|-----------------------|--------------------------|--------------------------|-----------|--------------------------|-----------------------|--------------------------|--------------------------|
| Rank 2019  | Cause                    | YLD rate (95% UI)     | Change from 2000 to 2019 | Change from 2019 to 2021 | Rank 2019 | Cause                    | YLD rate (95% UI)     | Change from 2000 to 2019 | Change from 2019 to 2021 |
| 1          | Low back pain            | 1088.1 (774.9-1456.8) | -2.0%                    | 0.7%                     | 1         | Low back pain            | 1069.5 (764.2-1440.6) | -1.7%                    | 1.2%                     |
| 2          | Headache disorders       | 840.4 (135.3-1808.8)  | -1.5%                    | -4.6%                    | 2         | Headache disorders       | 825.6 (136.7-1768.6)  | -1.8%                    | -4.9%                    |
| 3          | Depressive disorders     | 803.7 (545.5-1116.6)  | -3.9%                    | 22.1%                    | 3         | Depressive disorders     | 680.7 (463.4-934)     | -10.7%                   | 23.0%                    |
| 4          | Anxiety disorders        | 655.7 (456.7-899.7)   | 11.7%                    | 22.7%                    | 4         | Anxiety disorders        | 662.1 (457.4-910.5)   | 8.2%                     | 24.0%                    |
| 5          | Falls                    | 620.9 (420.1-867.3)   | -9.1%                    | -0.1%                    | 5         | Falls                    | 563.0 (383.6-774.7)   | -12.9%                   | -0.2%                    |
| 6          | Gynecological diseases   | 382.7 (271.3-535.4)   | -7.8%                    | -0.5%                    | 6         | Gynecological diseases   | 389.1 (271.9-541.4)   | -9.8%                    | -0.7%                    |
| 7          | Other musculoskeletal    | 367.3 (247.3-524.8)   | 18.8%                    | 3.6%                     | 7         | Other musculoskeletal    | 383.3 (257.6-543.1)   | 17.0%                    | 3.6%                     |
| 8          | Age-related hearing loss | 334.3 (232-459.8)     | 0.6%                     | -0.05%                   | 8         | Age-related hearing loss | 334.6 (232.1-461.8)   | 0.5%                     | -0.1%                    |
| 9          | Diabetes mellitus        | 331.4 (234.1-463.7)   | 31.2%                    | 7.1%                     | 9         | Neck pain                | 327.9 (216.7-471.8)   | 0.2%                     | -0.2%                    |
| 10         | Neck pain                | 326.9 (215.0-471.7)   | 0.2%                     | -0.2%                    | 10        | Diabetes mellitus        | 308.7 (213.7-433.8)   | 25.7%                    | 5.7%                     |

  

| South     |                          |                       |                          |                          | Islands   |                          |                       |                          |                          |
|-----------|--------------------------|-----------------------|--------------------------|--------------------------|-----------|--------------------------|-----------------------|--------------------------|--------------------------|
| Rank 2019 | Cause                    | YLD rate (95% UI)     | Change from 2000 to 2019 | Change from 2019 to 2021 | Rank 2019 | Cause                    | YLD rate (95% UI)     | Change from 2000 to 2019 | Change from 2019 to 2021 |
| 1         | Low back pain            | 1063.3 (758.7-1422.7) | -1.9%                    | 0.7%                     | 1         | Low back pain            | 1058.9 (750.1-1421.2) | -2.1%                    | 0.6%                     |
| 2         | Headache disorders       | 821.1 (134.2-1755.9)  | -2.1%                    | -4.9%                    | 2         | Headache disorders       | 781.3 (137.4-1652)    | -2.1%                    | -4.9%                    |
| 3         | Anxiety disorders        | 658.0 (457.7-904.8)   | 11.0%                    | 25.0%                    | 3         | Depressive disorders     | 624.4 (424.2-860.2)   | -8.5%                    | 23.5%                    |
| 4         | Depressive disorders     | 606.6 (415.3-835.2)   | -9.7%                    | 22.5%                    | 4         | Anxiety disorders        | 616.8 (428.4-852.1)   | 10.0%                    | 26.5%                    |
| 5         | Falls                    | 579.3 (391.0-809.0)   | -4.6%                    | -0.3%                    | 5         | Diabetes mellitus        | 553.8 (381.6-751.5)   | 29.8%                    | 5.1%                     |
| 6         | Gynecological diseases   | 399.1 (280.7-559.7)   | -10.7%                   | -0.7%                    | 6         | Falls                    | 424.8 (291.0-583.0)   | -22.0%                   | -0.4%                    |
| 7         | Other musculoskeletal    | 380.0 (258.3-533.8)   | 14.8%                    | 3.3%                     | 7         | Other musculoskeletal    | 400.0 (270.7-566.9)   | 18.1%                    | 3.3%                     |
| 8         | Diabetes mellitus        | 364.5 (251.9-509.9)   | 23.8%                    | 5.9%                     | 8         | Gynecological diseases   | 383.5 (268.1-533.7)   | -13.5%                   | -0.8%                    |
| 9         | Age-related hearing loss | 335.0 (232.5-462.1)   | 0.3%                     | -0.1%                    | 9         | Age-related hearing loss | 334.1 (231.6-460.4)   | 0.2%                     | 0.1%                     |
| 10        | Neck pain                | 327.8 (217.2-472.6)   | 0.1%                     | -0.3%                    | 10        | Neck pain                | 327.4 (217.2-469.9)   | 0.0%                     | -0.3%                    |

NCDs CMNNDs Injuries

Change 2000: YLD rate change (%) from 2000 to 2019; Change 2021: YLD rate change (%) from 2019 to 2021. Abbreviations: NCDs: Non-Communicable Diseases; CMNNDs: Communicable, Maternal, Neonatal, Nutritional Disorders.

Table S1. Ten leading causes of all-age Years Lived with Disability (YLDs) in 2019 by region.

| Region                     | Rank (2019) | Cause                    | YLDs per 100000 [95% UI] | Change 2000 (%) | Change 2021 (%) |
|----------------------------|-------------|--------------------------|--------------------------|-----------------|-----------------|
| Piemonte - North-West      | 1           | Low back pain            | 1646.6 [1163.5-2199]     | 4.5             | 1.9             |
|                            | 2           | Headache disorders       | 842.1 [173.6-1767]       | -8.2            | 3.2             |
|                            | 3           | Falls                    | 825.8 [574.7-1122.2]     | -7.5            | 1.1             |
|                            | 4           | Age-related hearing loss | 771.3 [547-1055.6]       | -5.3            | 6.2             |
|                            | 5           | Depressive disorders     | 735.4 [511.3-1014.7]     | 18.4            | 8.7             |
|                            | 6           | Anxiety disorders        | 679 [470.7-911.7]        | 9.5             | 15.4            |
|                            | 7           | Osteoarthritis           | 578.8 [278.8-1173.3]     | 28.3            | 2.0             |
|                            | 8           | Other musculoskeletal    | 557.8 [370.6-797.8]      | 26.2            | 4.8             |
|                            | 9           | Alzheimer and other      | 555.3 [380.5-752.9]      | 27.3            | 3.1             |
|                            | 10          | Diabetes mellitus        | 537.2 [373.8-763.4]      | 27.9            | 5.9             |
| Valle d'Aosta - North-West | 1           | Low back pain            | 1603.3 [1147.1-2157.7]   | 5.2             | 2.2             |
|                            | 2           | Falls                    | 1052.8 [732.1-1425.9]    | -3.7            | 1.3             |
|                            | 3           | Headache disorders       | 844.4 [173.1-1760.9]     | -5.8            | -0.2            |
|                            | 4           | Age-related hearing loss | 730 [516.6-994.1]        | -9.1            | 9.8             |
|                            | 5           | Depressive disorders     | 726.9 [500.1-990.6]      | 18.5            | 9.7             |
|                            | 6           | Anxiety disorders        | 677.4 [476.4-914]        | 16.9            | 9.9             |
|                            | 7           | Diabetes mellitus        | 612.9 [428.6-851.8]      | 28.4            | 8.6             |
|                            | 8           | Osteoarthritis           | 559.4 [272-1122.7]       | 31.1            | 3.1             |
|                            | 9           | Alzheimer and other      | 490.9 [335.3-660.9]      | 15.2            | 2.5             |
|                            | 10          | Other musculoskeletal    | 477.4 [312.5-701.4]      | 13.2            | 4.9             |

| Region                  | Rank (2019) | Cause                    | YLDs per 100000 [95% UI] | Change 2000 (%) | Change 2021 (%) |
|-------------------------|-------------|--------------------------|--------------------------|-----------------|-----------------|
| Lombardia - North-West  | 1           | Low back pain            | 1554.1 [1103-2068.8]     | 4.8             | 2.0             |
|                         | 2           | Falls                    | 1046.4 [714-1431.8]      | -2.3            | 0.9             |
|                         | 3           | Headache disorders       | 880.1 [173.6-1873.2]     | -6.5            | -2.9            |
|                         | 4           | Depressive disorders     | 724.9 [499.6-992.9]      | -10.0           | 17.1            |
|                         | 5           | Age-related hearing loss | 700.7 [500.1-963.9]      | 13.2            | 16.3            |
|                         | 6           | Anxiety disorders        | 679.2 [464.7-918.9]      | 23.5            | 5.4             |
|                         | 7           | Osteoarthritis           | 536.9 [258.2-1079.2]     | 19.9            | 2.7             |
|                         | 8           | Other musculoskeletal    | 500.8 [332.1-728.5]      | 18.0            | 4.8             |
|                         | 9           | Alzheimer and other      | 498 [338.3-669.2]        | 20.9            | 3.0             |
|                         | 10          | Neck pain                | 442.6 [292.8-617.8]      | 8.5             | 0.4             |
| AP Bolzano - North-East | 1           | Low back pain            | 1506.2 [1078.8-2010.6]   | 7.7             | 2.0             |
|                         | 2           | Falls                    | 1180.4 [812.8-1603.1]    | 2.5             | 1.5             |
|                         | 3           | Headache disorders       | 847.6 [163.1-1794.5]     | -4.5            | -5.2            |
|                         | 4           | Depressive disorders     | 705.2 [488.7-958.9]      | -8.1            | 13.9            |
|                         | 5           | Anxiety disorders        | 675.4 [460.9-907.4]      | 11.2            | 16.6            |
|                         | 6           | Age-related hearing loss | 636.5 [454.6-875.1]      | 28.7            | 2.5             |
|                         | 7           | Diabetes mellitus        | 496.7 [349.4-694.6]      | 0.5             | 8.6             |
|                         | 8           | Osteoarthritis           | 489.2 [235.9-989.6]      | 24.0            | 3.1             |
|                         | 9           | Gynaecological diseases  | 428.7 [299-602.4]        | 20.5            | 1.1             |
|                         | 10          | Alzheimer and other      | 423.6 [292.6-560.1]      | 21.3            | 0.4             |
| AP Trento – North-East  | 1           | Low back pain            | 1546.6 [1102.6-2076.4]   | 5.4             | 2.3             |
|                         | 2           | Falls                    | 1189.7 [814.9-1627.4]    | 10.0            | 0.9             |
|                         | 3           | Headache disorders       | 845.7 [170-1790.1]       | -4.8            | -2.3            |
|                         | 4           | Depressive disorders     | 719.1 [496.3-980.5]      | -8.8            | 11.7            |
|                         | 5           | Age-related hearing loss | 694.5 [493.5-948]        | 13.4            | 12.6            |
|                         | 6           | Anxiety disorders        | 677.4 [472.3-919]        | 21.8            | 4.3             |
|                         | 7           | Diabetes mellitus        | 561.3 [395-774.7]        | 26.1            | 8.3             |
|                         | 8           | Osteoarthritis           | 527.7 [257.2-1065.4]     | 27.5            | 2.7             |
|                         | 9           | Alzheimer and other      | 482.9 [331.8-649.4]      | 20.5            | 0.8             |
|                         | 10          | Neck pain                | 434.7 [288-608.8]        | 10.3            | 4.7             |

| Region                             | Rank (2019) | Cause                    | YLDs per 100000 [95% UI] | Change 2000 (%) | Change 2021 (%) |
|------------------------------------|-------------|--------------------------|--------------------------|-----------------|-----------------|
| Veneto - North East                | 1           | Low back pain            | 1572 [1108.9-2101.9]     | 5.7             | 2.4             |
|                                    | 2           | Depressive disorders     | 914.7 [614.7-1263.4]     | -4.5            | 15.1            |
|                                    | 3           | Falls                    | 909 [624.5-1233.5]       | -3.3            | 1.2             |
|                                    | 4           | Headache disorders       | 851.7 [171.1-1791.2]     | -5.7            | -5.2            |
|                                    | 5           | Age-related hearing loss | 703.3 [495.3-956.6]      | 14.3            | 13.3            |
|                                    | 6           | Anxiety disorders        | 679.1 [471.5-916.1]      | 21.6            | 6.2             |
|                                    | 7           | Diabetes mellitus        | 637.2 [436.5-873.2]      | 29.6            | 10.7            |
|                                    | 8           | Osteoarthritis           | 525.1 [254.1-1068.3]     | 24.6            | 3.2             |
|                                    | 9           | Other musculoskeletal    | 499.2 [326-714.6]        | 22.8            | 5.3             |
|                                    | 10          | Alzheimer and other      | 464.1 [314.1-629.1]      | 14.3            | 3.4             |
| Friuli-Venezia Giulia - North-East | 1           | Low back pain            | 1644.8 [1184.8-2220.3]   | 4.1             | 1.8             |
|                                    | 2           | Falls                    | 989.2 [689.1-1333.2]     | -3.2            | 1.5             |
|                                    | 3           | Osteoarthritis           | 871.4 [424.7-1750]       | -2.0            | 2.2             |
|                                    | 4           | Headache disorders       | 835.1 [172.9-1747.3]     | 2.4             | 3.0             |
|                                    | 5           | Age-related hearing loss | 779.5 [557-1064.5]       | 13.3            | 4.1             |
|                                    | 6           | Depressive disorders     | 734.1 [503.8-1005.6]     | 14.6            | 8.4             |
|                                    | 7           | Anxiety disorders        | 676.2 [469.1-912.1]      | 9.5             | 17.1            |
|                                    | 8           | Diabetes mellitus        | 656.3 [460-890.7]        | 40.4            | 9.6             |
|                                    | 9           | Alzheimer and other      | 556.7 [381.8-744.5]      | 25.6            | 2.5             |
|                                    | 10          | Other musculoskeletal    | 517.7 [339.6-757]        | 18.2            | 4.9             |
| Liguria - North-West               | 1           | Low back pain            | 1684.4 [1189.4-2251.3]   | 2.3             | 1.6             |
|                                    | 2           | Falls                    | 1235.3 [853.1-1676.2]    | -1.4            | 0.9             |
|                                    | 3           | Age-related hearing loss | 850.3 [609.9-1156.8]     | -2.0            | 1.3             |
|                                    | 4           | Headache disorders       | 826.1 [172.4-1726.2]     | -0.1            | 4.2             |
|                                    | 5           | Depressive disorders     | 743.7 [517.2-1016.2]     | 3.7             | 8.1             |
|                                    | 6           | Anxiety disorders        | 676.6 [459-904.6]        | 9.3             | 15.9            |
|                                    | 7           | Osteoarthritis           | 635.8 [310-1288.5]       | 21.9            | 4.1             |
|                                    | 8           | Alzheimer and other      | 617.9 [424.6-825.9]      | 30.5            | 5.0             |
|                                    | 9           | Diabetes mellitus        | 613.2 [420.3-856.5]      | 33.2            | 3.1             |
|                                    | 10          | Oral disorders           | 492.1 [306.5-730]        | 8.3             | 1.3             |

| Region                      | Rank (2019) | Cause                    | YLDs per 100000 [95% UI] | Change 2000 (%) | Change 2021 (%) |
|-----------------------------|-------------|--------------------------|--------------------------|-----------------|-----------------|
| Emilia-Romagna - North-East | 1           | Low back pain            | 1596.4 [1130.8-2128]     | 0.5             | 1.8             |
|                             | 2           | Depressive disorders     | 1140.7 [785.2-1551.9]    | -4.0            | 17.8            |
|                             | 3           | Falls                    | 1039.5 [715.4-1412.9]    | -5.0            | 0.9             |
|                             | 4           | Headache disorders       | 896.6 [174.6-1913.8]     | -4.5            | -3.8            |
|                             | 5           | Age-related hearing loss | 729.5 [520.6-997.5]      | 12.2            | 11.0            |
|                             | 6           | Anxiety disorders        | 675.9 [468.2-908.4]      | 10.3            | 9.3             |
|                             | 7           | Diabetes mellitus        | 625.9 [444.5-859.4]      | 34.3            | 7.1             |
|                             | 8           | Alzheimer and other      | 611.4 [418.3-806.4]      | 31.6            | 1.0             |
|                             | 9           | Osteoarthritis           | 552.1 [268-1108.5]       | 23.8            | 2.1             |
|                             | 10          | Other musculoskeletal    | 480.2 [315.1-689.2]      | 10.0            | 5.2             |
| Toscana - Centre            | 1           | Low back pain            | 1616.3 [1144-2163.9]     | 2.8             | 2.0             |
|                             | 2           | Depressive disorders     | 1011 [690.3-1381.7]      | -12.0           | 15.7            |
|                             | 3           | Headache disorders       | 843.1 [174.2-1769.2]     | -6.2            | 8.9             |
|                             | 4           | Falls                    | 819 [564.7-1106.9]       | -7.2            | 1.5             |
|                             | 5           | Anxiety disorders        | 784.2 [551.2-1062.4]     | 2.4             | 2.1             |
|                             | 6           | Age-related hearing loss | 770.1 [544.9-1048.7]     | 18.0            | 1.8             |
|                             | 7           | Diabetes mellitus        | 613.5 [426.5-847.5]      | 36.2            | 7.2             |
|                             | 8           | Osteoarthritis           | 546.2 [263.2-1112.3]     | 21.7            | 4.3             |
|                             | 9           | Other musculoskeletal    | 543.8 [363.2-779.3]      | 21.3            | 2.9             |
|                             | 10          | Alzheimer and other      | 525.9 [362.4-705.1]      | 20.4            | 2.3             |
| Umbria - Centre             | 1           | Low back pain            | 1611.3 [1146.2-2152.2]   | 2.2             | 2.2             |
|                             | 2           | Falls                    | 1025.5 [711.6-1395.2]    | -0.5            | 1.0             |
|                             | 3           | Headache disorders       | 848.3 [173.6-1777.4]     | -3.4            | 0.3             |
|                             | 4           | Age-related hearing loss | 762.1 [542-1037.1]       | -6.0            | 5.8             |
|                             | 5           | Depressive disorders     | 735.8 [513-1006]         | 12.7            | 9.6             |
|                             | 6           | Anxiety disorders        | 681.4 [477.2-906.3]      | 10.1            | 14.1            |
|                             | 7           | Osteoarthritis           | 564.9 [274.1-1146.7]     | 21.7            | 2.5             |
|                             | 8           | Alzheimer and other      | 551.1 [372.8-732.7]      | 21.1            | 1.6             |
|                             | 9           | Other musculoskeletal    | 492.4 [328.1-703.9]      | 13.6            | 5.9             |
|                             | 10          | Diabetes mellitus        | 490.6 [337.9-691.5]      | 15.3            | 5.7             |

| Region          | Rank (2019) | Cause                     | YLDs per 100000 [95% UI] | Change 2000 (%) | Change 2021 (%) |
|-----------------|-------------|---------------------------|--------------------------|-----------------|-----------------|
| Marche - Centre | 1           | Low back pain             | 1455.1 [1012.9-2035.1]   | 4.1             | 5.5             |
|                 | 2           | Headache disorders        | 852.2 [174.7-1785.1]     | -3.8            | 0.4             |
|                 | 3           | Falls                     | 829.9 [572.8-1126.3]     | -3.9            | 1.4             |
|                 | 4           | Age-related hearing loss  | 755.5 [540.3-1030.2]     | -6.4            | 7.2             |
|                 | 5           | Depressive disorders      | 736.2 [509.4-1011.5]     | 16.2            | 4.4             |
|                 | 6           | Osteoarthritis            | 531.5 [255.4-1102.1]     | 18.8            | 6.2             |
|                 | 7           | Other musculoskeletal     | 530.4 [344-770.4]        | 19.9            | 5.4             |
|                 | 8           | Alzheimer and other       | 524.2 [355.5-707.6]      | 20.0            | 3.9             |
|                 | 9           | Anxiety disorders         | 469 [317.5-646.4]        | 9.5             | 14.4            |
|                 | 10          | Diabetes mellitus         | 468.5 [329.4-663.4]      | 12.1            | 7.5             |
| Lazio - Centre  | 1           | Low back pain             | 1560 [1114.7-2087.1]     | 6.2             | 2.5             |
|                 | 2           | Falls                     | 1044.9 [722.5-1421]      | 1.0             | 1.6             |
|                 | 3           | Headache disorders        | 862.9 [174.8-1815.8]     | -5.3            | 0.9             |
|                 | 4           | Depressive disorders      | 735.5 [503.7-1016.3]     | -9.2            | 12.2            |
|                 | 5           | Anxiety disorders         | 683.2 [470.2-921]        | 9.7             | 19.6            |
|                 | 6           | Age-related hearing loss  | 678 [481-929]            | 26.2            | 2.8             |
|                 | 7           | Diabetes mellitus         | 615.8 [429.6-848.7]      | 16.3            | 8.0             |
|                 | 8           | Osteoarthritis            | 527.7 [257.1-1068.8]     | 24.9            | 3.1             |
|                 | 9           | Other musculoskeletal     | 483.1 [322.7-702.2]      | 15.2            | 5.5             |
|                 | 10          | Blindness and vision loss | 479.7 [340.2-679.1]      | 17.4            | 2.5             |
| Abruzzo - South | 1           | Low back pain             | 1581.8 [1124.9-2106]     | 6.8             | 2.4             |
|                 | 2           | Falls                     | 1024.2 [708.9-1394.5]    | -3.8            | 1.4             |
|                 | 3           | Headache disorders        | 804.9 [158.6-1705.1]     | -5.3            | 3.2             |
|                 | 4           | Depressive disorders      | 734.2 [509.7-1017.5]     | -7.5            | 6.7             |
|                 | 5           | Age-related hearing loss  | 729.5 [521.6-999.8]      | 17.6            | 5.0             |
|                 | 6           | Anxiety disorders         | 681.6 [474.4-915.2]      | 15.5            | 9.4             |
|                 | 7           | Diabetes mellitus         | 639.5 [441.3-877.8]      | 30.5            | 8.2             |
|                 | 8           | Osteoarthritis            | 550.9 [265.5-1104.3]     | 30.4            | 3.0             |
|                 | 9           | Alzheimer and other       | 507.3 [348.7-672.8]      | 21.2            | 3.7             |
|                 | 10          | Other musculoskeletal     | 499.9 [332.8-727.4]      | 20.0            | 4.4             |

| Region           | Rank (2019) | Cause                    | YLDs per 100000 [95% UI] | Change 2000 (%) | Change 2021 (%) |
|------------------|-------------|--------------------------|--------------------------|-----------------|-----------------|
| Molise - South   | 1           | Low back pain            | 1590.7 [1128.4-2109.6]   | 7.9             | 2.2             |
|                  | 2           | Falls                    | 1119.2 [775.5-1532.8]    | 1.5             | 1.3             |
|                  | 3           | Headache disorders       | 851.5 [173.1-1778.6]     | -2.9            | 1.7             |
|                  | 4           | Age-related hearing loss | 753.8 [535.1-1027]       | -4.3            | 8.2             |
|                  | 5           | Depressive disorders     | 736.7 [514.5-1010.5]     | 18.9            | 9.4             |
|                  | 6           | Diabetes mellitus        | 717.9 [499.6-984.5]      | 19.1            | 8.3             |
|                  | 7           | Anxiety disorders        | 681.7 [481.3-912.9]      | 43.8            | 13.3            |
|                  | 8           | Osteoarthritis           | 555.1 [266.8-1116.7]     | 18.8            | 3.1             |
|                  | 9           | Alzheimer and other      | 532.7 [361.4-718.5]      | 26.2            | 3.0             |
|                  | 10          | Other musculoskeletal    | 466.1 [303.5-675]        | 12.0            | 5.5             |
| Campania - South | 1           | Low back pain            | 1462.1 [1028.8-1959.4]   | 12.6            | 2.7             |
|                  | 2           | Headache disorders       | 877.7 [171.2-1837.2]     | -2.3            | -2.8            |
|                  | 3           | Falls                    | 817.9 [555.8-1116.7]     | 8.0             | 3.1             |
|                  | 4           | Depressive disorders     | 718.3 [492.1-986.2]      | 8.0             | 15.8            |
|                  | 5           | Anxiety disorders        | 691.4 [480.7-931.6]      | 11.2            | 20.1            |
|                  | 6           | Diabetes mellitus        | 663.4 [463.6-920.5]      | 29.8            | 7.6             |
|                  | 7           | Age-related hearing loss | 601.1 [423.1-827.4]      | 34.7            | 3.2             |
|                  | 8           | Other musculoskeletal    | 513.2 [345.9-734.1]      | 24.6            | 5.1             |
|                  | 9           | Gynaecological diseases  | 466.4 [323-651.3]        | 15.4            | 1.5             |
|                  | 10          | Osteoarthritis           | 455.7 [218.1-916.3]      | 19.2            | 1.1             |
| Puglia - South   | 1           | Low back pain            | 1517.3 [1073.6-2035.8]   | 12.4            | 2.4             |
|                  | 2           | Falls                    | 913.6 [626.1-1246.9]     | 1.1             | 1.9             |
|                  | 3           | Headache disorders       | 868.4 [172.4-1829.5]     | 5.2             | 0.0             |
|                  | 4           | Depressive disorders     | 731.4 [506.2-996.9]      | -5.6            | 14.2            |
|                  | 5           | Anxiety disorders        | 688.1 [479.2-923.6]      | 10.1            | 19.7            |
|                  | 6           | Age-related hearing loss | 676 [475.8-932.9]        | 38.3            | 3.5             |
|                  | 7           | Diabetes mellitus        | 591.6 [411.5-839.6]      | 21.6            | 11.1            |
|                  | 8           | Osteoarthritis           | 505.3 [246.3-1021.9]     | 25.7            | 3.6             |
|                  | 9           | Other musculoskeletal    | 493.4 [329-701.4]        | 24.8            | 5.5             |
|                  | 10          | Neck pain                | 440.6 [293.4-616.8]      | 13.3            | 1.3             |

| Region             | Rank (2019) | Cause                    | YLDs per 100000 [95% UI] | Change 2000 (%) | Change 2021 (%) |
|--------------------|-------------|--------------------------|--------------------------|-----------------|-----------------|
| Basilicata - South | 1           | Low back pain            | 1569.5 [1114.3-2089.8]   | 11.4            | 2.6             |
|                    | 2           | Falls                    | 860.4 [596.8-1170.3]     | -3.3            | 2.0             |
|                    | 3           | Headache disorders       | 860.4 [178.2-1815]       | 10.3            | -3.4            |
|                    | 4           | Depressive disorders     | 735.5 [505-1019.6]       | -5.5            | 10.8            |
|                    | 5           | Age-related hearing loss | 717.7 [509.8-982]        | 15.8            | 11.3            |
|                    | 6           | Diabetes mellitus        | 715.6 [499.8-990]        | 33.0            | 8.7             |
|                    | 7           | Anxiety disorders        | 682.9 [469.4-923.2]      | 47.3            | 8.1             |
|                    | 8           | Osteoarthritis           | 532.5 [257.1-1081.5]     | 18.9            | 3.7             |
|                    | 9           | Other musculoskeletal    | 492.3 [325-699.9]        | 22.7            | 5.5             |
|                    | 10          | Alzheimer and other      | 489.2 [334-655.1]        | 22.8            | 3.5             |
| Calabria - South   | 1           | Low back pain            | 1496.3 [1051.1-2009.7]   | 10.8            | 2.4             |
|                    | 2           | Headache disorders       | 867 [171.3-1826.4]       | -3.0            | -1.0            |
|                    | 3           | Falls                    | 844.5 [580.8-1149.3]     | 3.4             | 0.2             |
|                    | 4           | Depressive disorders     | 728.1 [507.8-989.5]      | -5.5            | 12.8            |
|                    | 5           | Diabetes mellitus        | 716.5 [503.3-987.7]      | 14.6            | 14.3            |
|                    | 6           | Anxiety disorders        | 687.9 [467.7-922.8]      | 35.0            | 13.0            |
|                    | 7           | Age-related hearing loss | 673.4 [472.4-924.5]      | 43.7            | 2.5             |
|                    | 8           | Other musculoskeletal    | 511.3 [332.1-735.4]      | 17.1            | 4.8             |
|                    | 9           | Osteoarthritis           | 501.2 [243.5-1009.4]     | 27.2            | 3.1             |
|                    | 10          | Neck pain                | 437.2 [290-616.9]        | 12.1            | 1.4             |
| Sicilia - Islands  | 1           | Low back pain            | 1484.4 [1048.1-1999.7]   | 9.7             | 2.4             |
|                    | 2           | Diabetes mellitus        | 1065.9 [729.8-1462.4]    | 29.1            | 6.8             |
|                    | 3           | Headache disorders       | 804.8 [171.6-1689]       | 4.6             | 7.9             |
|                    | 4           | Depressive disorders     | 722.5 [496.5-993.3]      | 1.7             | 16.6            |
|                    | 5           | Anxiety disorders        | 685.8 [478.3-928.6]      | 6.3             | 11.5            |
|                    | 6           | Age-related hearing loss | 652.2 [460.9-893.2]      | 4.8             | 3.0             |
|                    | 7           | Falls                    | 643.7 [442.5-874.2]      | 27.2            | 1.6             |
|                    | 8           | Other musculoskeletal    | 540 [365.1-763.9]        | 9.5             | 5.1             |
|                    | 9           | Osteoarthritis           | 486.8 [235.9-986.2]      | 18.2            | 3.3             |
|                    | 10          | Alzheimer and other      | 467.6 [322.6-624]        | 18.5            | 3.4             |

| Region             | Rank (2019) | Cause                    | YLDs per 100000 [95% UI] | Change 2000 (%) | Change 2021 (%) |
|--------------------|-------------|--------------------------|--------------------------|-----------------|-----------------|
| Sardegna - Islands | 1           | Low back pain            | 1610 [1133.2-2156.1]     | 14.5            | 2.7             |
|                    | 2           | Diabetes mellitus        | 887.2 [618.3-1230.1]     | -4.2            | 12.2            |
|                    | 3           | Headache disorders       | 862.7 [178.3-1812.6]     | 2.7             | 9.6             |
|                    | 4           | Depressive disorders     | 839.2 [574.5-1151.2]     | 7.2             | 1.7             |
|                    | 5           | Falls                    | 833.5 [577-1134]         | 54.4            | -2.2            |
|                    | 6           | Age-related hearing loss | 726 [515.8-991.8]        | 43.9            | 4.0             |
|                    | 7           | Osteoarthritis           | 553.9 [267.3-1109.3]     | 12.4            | 5.7             |
|                    | 8           | Other musculoskeletal    | 531.9 [352.1-757.3]      | 10.1            | 8.3             |
|                    | 9           | Anxiety disorders        | 510 [345-698.3]          | 21.9            | 9.8             |
|                    | 10          | Alzheimer and other      | 479.8 [325.7-643.7]      | 17.1            | 5.2             |

Change 2000: YLL rate change (%) from 2000 to 2019; Change 2021: YLL rate change (%) from 2019 to 2021.

Abbreviations: UI: Uncertainty Interval.

Table S2. Ten leading causes of age-standardised Years Lived with Disability (YLDs) in 2019 by region.

| Region                     | Rank (2019) | Cause                    | YLDs per 100000 [95% UI] | Change 2000 (%) | Change 2021 (%) |
|----------------------------|-------------|--------------------------|--------------------------|-----------------|-----------------|
| Piemonte - North-West      | 1           | Low back pain            | 1101.6 [776-1471.5]      | -1.4            | 0.6             |
|                            | 2           | Headache disorders       | 826.5 [135.8-1773.9]     | -1.5            | 0.6             |
|                            | 3           | Anxiety disorders        | 658.3 [453-896.4]        | -1.9            | 19.4            |
|                            | 4           | Depressive disorders     | 608 [414.2-845.3]        | 3.0             | 25.6            |
|                            | 5           | Falls                    | 469.8 [323.3-645.1]      | -19.9           | -0.2            |
|                            | 6           | Other musculoskeletal    | 411.3 [279.5-579.8]      | 10.4            | 3.6             |
|                            | 7           | Age-related hearing loss | 336.6 [233.5-467]        | 0.9             | -0.2            |
|                            | 8           | Gynaecological diseases  | 333.9 [230.5-470.2]      | 0.6             | -0.6            |
|                            | 9           | Neck pain                | 328.3 [215.3-472.9]      | 0.4             | -0.2            |
|                            | 10          | Diabetes mellitus        | 270.4 [187-380.5]        | 9.2             | 5.1             |
| Valle d'Aosta - North-West | 1           | Low back pain            | 1091 [784.4-1460.6]      | -1.8            | 0.6             |
|                            | 2           | Headache disorders       | 825.6 [136.1-1771]       | -0.9            | -2.8            |
|                            | 3           | Anxiety disorders        | 657.5 [452-903.1]        | -11.0           | 19.5            |
|                            | 4           | Falls                    | 634.2 [434.8-869.3]      | -4.8            | 16.5            |
|                            | 5           | Depressive disorders     | 606.3 [414.8-828.4]      | 3.4             | 4.4             |
|                            | 6           | Other musculoskeletal    | 364.1 [242.2-518.2]      | -13.5           | 3.1             |
|                            | 7           | Gynaecological diseases  | 355.8 [249.9-500.7]      | 6.6             | -0.3            |
|                            | 8           | Age-related hearing loss | 335.8 [232.6-463.8]      | 3.2             | 2.4             |
|                            | 9           | Neck pain                | 327.4 [215.4-470.9]      | 9.7             | 2.4             |
|                            | 10          | Diabetes mellitus        | 323.2 [223.6-446.4]      | 23.8            | 1.1             |

| Region                  | Rank (2019) | Cause                    | YLDs per 100000 [95% UI] | Change 2000 (%) | Change 2021 (%) |
|-------------------------|-------------|--------------------------|--------------------------|-----------------|-----------------|
| Lombardia - North-West  | 1           | Low back pain            | 1075.2 [764-1447.2]      | -2.0            | 0.7             |
|                         | 2           | Headache disorders       | 850.9 [142.5-1830.1]     | -1.9            | -3.5            |
|                         | 3           | Falls                    | 675.8 [454-952.8]        | -10.5           | 21.1            |
|                         | 4           | Anxiety disorders        | 656.9 [454.1-893]        | -2.0            | 14.3            |
|                         | 5           | Depressive disorders     | 606.2 [418.5-832.5]      | 2.7             | 11.0            |
|                         | 6           | Other musculoskeletal    | 378.1 [253.7-536.3]      | -2.1            | 3.4             |
|                         | 7           | Gynaecological diseases  | 350.4 [243.8-489]        | 5.7             | -0.6            |
|                         | 8           | Age-related hearing loss | 335.1 [232.5-463.2]      | 2.6             | 0.1             |
|                         | 9           | Neck pain                | 327.4 [215.2-469.9]      | 3.8             | -0.2            |
|                         | 10          | Osteoarthritis           | 254.6 [122.2-509.3]      | -1.4            | 0.5             |
| AP Bolzano - North-East | 1           | Low back pain            | 1096.3 [789.9-1470.3]    | -1.8            | 0.5             |
|                         | 2           | Headache disorders       | 819.7 [134.9-1765.3]     | -7.7            | -2.6            |
|                         | 3           | Falls                    | 797.3 [541.7-1104.5]     | -4.3            | -1.5            |
|                         | 4           | Anxiety disorders        | 655.1 [455.9-889.2]      | -1.8            | 19.0            |
|                         | 5           | Depressive disorders     | 602.8 [410.6-825.7]      | 2.8             | 17.9            |
|                         | 6           | Gynaecological diseases  | 405.6 [284.8-570.6]      | -7.2            | -0.7            |
|                         | 7           | Age-related hearing loss | 333.7 [232.5-461.8]      | 0.7             | 0.1             |
|                         | 8           | Neck pain                | 325.5 [213.8-469.1]      | 0.1             | -0.2            |
|                         | 9           | Other musculoskeletal    | 308.2 [197-447]          | 19.4            | 4.2             |
|                         | 10          | Diabetes mellitus        | 295.7 [206.1-411.7]      | 15.5            | 6.3             |
| AP Trento - North-East  | 1           | Low back pain            | 1087.7 [782.7-1465.1]    | -1.9            | 0.8             |
|                         | 2           | Headache disorders       | 823.9 [137.5-1767.9]     | -1.4            | -4.0            |
|                         | 3           | Falls                    | 790.8 [534.1-1104.6]     | 2.2             | -0.9            |
|                         | 4           | Anxiety disorders        | 656.3 [459.8-894.6]      | -2.0            | 19.0            |
|                         | 5           | Depressive disorders     | 605.8 [408.9-833.7]      | 2.8             | 19.6            |
|                         | 6           | Gynaecological diseases  | 377.9 [266.6-534.8]      | -4.4            | -0.2            |
|                         | 7           | Age-related hearing loss | 335 [231.9-459.8]        | 0.5             | 4.2             |
|                         | 8           | Other musculoskeletal    | 335 [221.5-485.2]        | 2.7             | 0.0             |
|                         | 9           | Neck pain                | 326.8 [215.4-469.2]      | 11.9            | 1.6             |
|                         | 10          | Diabetes mellitus        | 312.5 [218.2-437.9]      | 23.0            | 4.4             |

| Region                             | Rank (2019) | Cause                    | YLDs per 100000 [95% UI] | Change 2000 (%) | Change 2021 (%) |
|------------------------------------|-------------|--------------------------|--------------------------|-----------------|-----------------|
| Veneto - North East                | 1           | Low back pain            | 1083.3 [767.5-1452.2]    | -2.1            | 0.8             |
|                                    | 2           | Headache disorders       | 823.5 [135.7-1760.2]     | -1.5            | 11.2            |
|                                    | 3           | Depressive disorders     | 762.4 [518-1063]         | -4.2            | 4.4             |
|                                    | 4           | Anxiety disorders        | 656 [456.8-895.5]        | 0.2             | 19.3            |
|                                    | 5           | Falls                    | 576.2 [389.9-802.5]      | -1.8            | -0.5            |
|                                    | 6           | Gynaecological diseases  | 396.5 [279.7-556.6]      | -6.9            | -0.4            |
|                                    | 7           | Other musculoskeletal    | 374.5 [249.5-533.9]      | 12.4            | 3.6             |
|                                    | 8           | Diabetes mellitus        | 337.4 [233.5-470.7]      | 3.3             | 8.3             |
|                                    | 9           | Age-related hearing loss | 335.8 [231.8-463.8]      | 6.6             | -0.2            |
|                                    | 10          | Neck pain                | 327.2 [216.9-471.2]      | 26.2            | -0.3            |
| Friuli-Venezia Giulia - North-East | 1           | Low back pain            | 1087.5 [773-1465.5]      | -1.8            | 0.6             |
|                                    | 2           | Headache disorders       | 822.6 [136.5-1768.3]     | -1.5            | 0.6             |
|                                    | 3           | Anxiety disorders        | 656.3 [453.5-901.6]      | -1.5            | 19.2            |
|                                    | 4           | Depressive disorders     | 604.8 [413.6-829.7]      | -5.4            | 24.8            |
|                                    | 5           | Falls                    | 567.9 [389.4-779.3]      | -3.5            | 0.0             |
|                                    | 6           | Other musculoskeletal    | 385.5 [262.3-544.4]      | -1.0            | 3.4             |
|                                    | 7           | Osteoarthritis           | 382.7 [184.7-766.9]      | 8.4             | -0.1            |
|                                    | 8           | Gynaecological diseases  | 350 [245.5-492.9]        | 5.6             | 1.0             |
|                                    | 9           | Age-related hearing loss | 333.9 [232.4-462.4]      | 2.4             | 4.3             |
|                                    | 10          | Diabetes mellitus        | 328.1 [228.5-454.1]      | 0.6             | 1.7             |
| Liguria - North-West               | 1           | Low back pain            | 1082.7 [781.1-1445.1]    | -1.7            | 0.6             |
|                                    | 2           | Headache disorders       | 825.9 [134.9-1771.6]     | -1.6            | -0.5            |
|                                    | 3           | Anxiety disorders        | 658 [452.7-886.3]        | -10.0           | 19.3            |
|                                    | 4           | Falls                    | 637.7 [435-876.2]        | -4.9            | 17.3            |
|                                    | 5           | Depressive disorders     | 606.6 [414.6-831.5]      | 2.6             | 4.7             |
|                                    | 6           | Gynaecological diseases  | 380.6 [269.8-534.5]      | -12.6           | -0.4            |
|                                    | 7           | Other musculoskeletal    | 365.4 [244.1-517.1]      | 10.2            | 3.5             |
|                                    | 8           | Age-related hearing loss | 333.9 [232-459.9]        | 2.1             | -0.1            |
|                                    | 9           | Neck pain                | 327.5 [215.9-470.7]      | 5.0             | -0.3            |
|                                    | 10          | Diabetes mellitus        | 287.9 [197.8-408.5]      | 11.0            | 6.9             |

| Region                      | Rank (2019) | Cause                    | YLDs per 100000 [95% UI] | Change 2000 (%) | Change 2021 (%) |
|-----------------------------|-------------|--------------------------|--------------------------|-----------------|-----------------|
| Emilia-Romagna - North-East | 1           | Low back pain            | 1092.8 [780.2-1474]      | -1.9            | 7.6             |
|                             | 2           | Depressive disorders     | 950 [644.9-1304.4]       | -2.7            | 15.7            |
|                             | 3           | Headache disorders       | 868.1 [136.1-1879.7]     | -1.8            | -4.0            |
|                             | 4           | Anxiety disorders        | 655.1 [451.8-892.7]      | -5.7            | 24.3            |
|                             | 5           | Falls                    | 642.3 [433.2-899.7]      | 9.4             | 0.1             |
|                             | 6           | Gynaecological diseases  | 373.7 [265-524.9]        | -8.7            | 1.1             |
|                             | 7           | Other musculoskeletal    | 365 [245.5-513]          | 10.0            | 1.9             |
|                             | 8           | Age-related hearing loss | 332.9 [231.4-457.7]      | 2.1             | 5.6             |
|                             | 9           | Diabetes mellitus        | 332.1 [233.7-461.6]      | 8.5             | 0.3             |
|                             | 10          | Neck pain                | 326.8 [214.5-471.1]      | 24.7            | -0.1            |
| Toscana - Centre            | 1           | Low back pain            | 1082 [777.3-1443.1]      | -1.6            | 0.6             |
|                             | 2           | Depressive disorders     | 837.6 [566.4-1145.2]     | -11.3           | 22.0            |
|                             | 3           | Headache disorders       | 825.6 [134.7-1763]       | -1.3            | 11.8            |
|                             | 4           | Anxiety disorders        | 758.2 [527.8-1042.2]     | 3.9             | 3.6             |
|                             | 5           | Falls                    | 443.4 [303.6-606.3]      | -20.3           | -0.2            |
|                             | 6           | Other musculoskeletal    | 405.9 [272.2-566.2]      | 1.1             | 3.5             |
|                             | 7           | Gynaecological diseases  | 361.8 [251.1-507.5]      | 6.5             | -0.8            |
|                             | 8           | Age-related hearing loss | 335.6 [232.3-464.8]      | 0.9             | -0.3            |
|                             | 9           | Neck pain                | 327.7 [215.3-466.8]      | 0.4             | -0.1            |
|                             | 10          | Diabetes mellitus        | 309.9 [214.9-431.3]      | 19.5            | 5.6             |
| Umbria - Centre             | 1           | Low back pain            | 1090.7 [781.9-1468.8]    | -1.7            | 0.8             |
|                             | 2           | Headache disorders       | 827.8 [137.2-1774.2]     | -1.3            | -2.0            |
|                             | 3           | Anxiety disorders        | 659.1 [455.4-904.3]      | -1.7            | 19.5            |
|                             | 4           | Falls                    | 613.2 [418.3-847.9]      | -7.2            | 20.6            |
|                             | 5           | Depressive disorders     | 608.8 [411.8-837.3]      | 3.3             | 0.5             |
|                             | 6           | Gynaecological diseases  | 381 [265.4-532.6]        | -8.2            | 1.1             |
|                             | 7           | Other musculoskeletal    | 371.5 [251.7-528.5]      | 11.1            | 2.0             |
|                             | 8           | Age-related hearing loss | 334.4 [232.2-462.2]      | 2.3             | 0.2             |
|                             | 9           | Neck pain                | 328.4 [219.7-472.3]      | 4.8             | -0.1            |
|                             | 10          | Diabetes mellitus        | 254.2 [175.5-359.6]      | -1.5            | 4.9             |

| Region          | Rank (2019) | Cause                    | YLDs per 100000 [95% UI] | Change 2000 (%) | Change 2021 (%) |
|-----------------|-------------|--------------------------|--------------------------|-----------------|-----------------|
| Marche - Centre | 1           | Low back pain            | 980.8 [680.3-1363.9]     | -1.8            | 3.9             |
|                 | 2           | Headache disorders       | 829.6 [137-1778.7]       | -1.4            | -4.9            |
|                 | 3           | Depressive disorders     | 609.6 [418-839.7]        | -9.3            | 22.3            |
|                 | 4           | Falls                    | 482 [327.5-666.3]        | -13.4           | 18.8            |
|                 | 5           | Anxiety disorders        | 456.5 [305.7-636.5]      | 7.9             | 5.6             |
|                 | 6           | Other musculoskeletal    | 396.9 [265.9-565.3]      | -1.4            | 3.7             |
|                 | 7           | Gynaecological diseases  | 365.1 [256.5-511.6]      | 8.5             | -0.5            |
|                 | 8           | Age-related hearing loss | 336.5 [234.1-465.9]      | 0.3             | -0.1            |
|                 | 9           | Neck pain                | 329.1 [219.4-475.3]      | 0.4             | -0.3            |
|                 | 10          | Oral disorders           | 255.8 [153-385.2]        | -2.1            | 1.4             |
| Lazio - Centre  | 1           | Low back pain            | 1082.2 [773.7-1451.7]    | -1.8            | 0.9             |
|                 | 2           | Headache disorders       | 824.2 [136.9-1767.6]     | -2.3            | 0.2             |
|                 | 3           | Anxiety disorders        | 657.5 [452.2-904.7]      | -10.8           | 19.1            |
|                 | 4           | Falls                    | 655.3 [444.9-907.2]      | -3.7            | 16.2            |
|                 | 5           | Depressive disorders     | 611.8 [418.8-839.7]      | 3.4             | 6.7             |
|                 | 6           | Gynaecological diseases  | 413.8 [289.6-575.3]      | -10.3           | -0.8            |
|                 | 7           | Other musculoskeletal    | 366.6 [247.5-528.2]      | 10.5            | 3.7             |
|                 | 8           | Diabetes mellitus        | 334.6 [233.5-466.6]      | 2.2             | 5.8             |
|                 | 9           | Age-related hearing loss | 333.4 [231.1-459.5]      | 4.6             | 0.0             |
|                 | 10          | Neck pain                | 327.5 [216.7-470]        | 19.8            | -0.3            |
| Abruzzo - South | 1           | Low back pain            | 1076.4 [771-1435.5]      | -1.9            | 0.8             |
|                 | 2           | Headache disorders       | 780.8 [125.3-1709.7]     | -3.6            | 0.1             |
|                 | 3           | Anxiety disorders        | 656.7 [454.3-901]        | -9.1            | 13.5            |
|                 | 4           | Falls                    | 614.5 [417.6-853.3]      | -8.3            | 16.2            |
|                 | 5           | Depressive disorders     | 605.9 [411.7-834.5]      | 2.6             | 1.3             |
|                 | 6           | Gynaecological diseases  | 381.7 [269.2-538.9]      | -13.7           | 1.7             |
|                 | 7           | Other musculoskeletal    | 375.9 [251.5-539.4]      | 12.9            | 0.7             |
|                 | 8           | Diabetes mellitus        | 334.4 [230.3-459.6]      | 2.3             | 5.9             |
|                 | 9           | Age-related hearing loss | 334.3 [234.4-460.3]      | 6.9             | -0.1            |
|                 | 10          | Neck pain                | 327.5 [216.9-468.4]      | 26.3            | -0.2            |

| Region           | Rank (2019) | Cause                    | YLDs per 100000 [95% UI] | Change 2000 (%) | Change 2021 (%) |
|------------------|-------------|--------------------------|--------------------------|-----------------|-----------------|
| Molise - South   | 1           | Low back pain            | 1070.7 [760.9-1434.4]    | -2.1            | 0.6             |
|                  | 2           | Headache disorders       | 820 [136.4-1746.1]       | -2.1            | 0.3             |
|                  | 3           | Falls                    | 667.6 [452.7-929.6]      | -10.1           | 16.7            |
|                  | 4           | Anxiety disorders        | 654.4 [454.1-903.8]      | -2.0            | 14.4            |
|                  | 5           | Depressive disorders     | 602.5 [412.7-827.4]      | 2.3             | 10.3            |
|                  | 6           | Gynaecological diseases  | 379.5 [266.6-538.6]      | -13.2           | 3.1             |
|                  | 7           | Diabetes mellitus        | 369.3 [258-504.5]        | -3.4            | 2.0             |
|                  | 8           | Other musculoskeletal    | 351.9 [235-501.9]        | 5.6             | 3.7             |
|                  | 9           | Age-related hearing loss | 334.3 [233.2-459.8]      | 2.6             | 0.0             |
|                  | 10          | Neck pain                | 326.5 [216.3-464.9]      | 11.2            | -0.3            |
| Campania - South | 1           | Low back pain            | 1065.4 [759.8-1426.4]    | -1.7            | 0.7             |
|                  | 2           | Headache disorders       | 825.2 [135.6-1758.7]     | -1.8            | 0.6             |
|                  | 3           | Anxiety disorders        | 659 [461.2-907.3]        | -1.9            | 19.0            |
|                  | 4           | Depressive disorders     | 606.2 [413.1-830.7]      | 2.2             | 23.1            |
|                  | 5           | Falls                    | 573.5 [386-800.9]        | 4.8             | -0.5            |
|                  | 6           | Gynaecological diseases  | 426.2 [300.6-598]        | -7.8            | -0.7            |
|                  | 7           | Other musculoskeletal    | 389.4 [267.4-552.8]      | 12.1            | 3.6             |
|                  | 8           | Diabetes mellitus        | 386.5 [268.8-539.2]      | 15.8            | 3.9             |
|                  | 9           | Age-related hearing loss | 334.8 [232.9-464]        | 2.3             | -0.2            |
|                  | 10          | Neck pain                | 327.8 [218.2-472]        | 6.8             | -0.3            |
| Puglia - South   | 1           | Low back pain            | 1058.4 [753.2-1424]      | -2.2            | 0.5             |
|                  | 2           | Headache disorders       | 825.7 [135.7-1761]       | -2.1            | 0.7             |
|                  | 3           | Anxiety disorders        | 657.1 [457.5-894.5]      | -2.5            | 19.5            |
|                  | 4           | Depressive disorders     | 607.6 [412.4-832.5]      | -5.0            | 24.4            |
|                  | 5           | Falls                    | 593.7 [402.1-833]        | 0.0             | -0.2            |
|                  | 6           | Gynaecological diseases  | 382.1 [267.7-536.4]      | -12.9           | 0.2             |
|                  | 7           | Other musculoskeletal    | 369.7 [251-516.3]        | 10.7            | 2.5             |
|                  | 8           | Age-related hearing loss | 335.4 [234-466.2]        | 2.2             | 6.2             |
|                  | 9           | Diabetes mellitus        | 329.2 [225-465.3]        | 2.4             | 1.9             |
|                  | 10          | Neck pain                | 327.9 [216.3-472.5]      | 14.8            | -0.2            |

| Region             | Rank (2019) | Cause                    | YLDs per 100000 [95% UI] | Change 2000 (%) | Change 2021 (%) |
|--------------------|-------------|--------------------------|--------------------------|-----------------|-----------------|
| Basilicata - South | 1           | Low back pain            | 1075.6 [767.1-1451.9]    | -1.5            | 0.7             |
|                    | 2           | Headache disorders       | 821.1 [136.9-1759.8]     | -2.1            | -3.4            |
|                    | 3           | Anxiety disorders        | 653.6 [456.1-897]        | -2.4            | 19.5            |
|                    | 4           | Depressive disorders     | 604.8 [415.2-839.1]      | 2.8             | 17.6            |
|                    | 5           | Falls                    | 509.3 [349.3-699.7]      | -10.3           | -0.1            |
|                    | 6           | Diabetes mellitus        | 378.5 [261.5-526.2]      | -10.7           | 5.9             |
|                    | 7           | Gynaecological diseases  | 374.7 [263-527.7]        | 12.0            | 2.1             |
|                    | 8           | Other musculoskeletal    | 369.9 [249.9-526.7]      | 13.2            | 0.8             |
|                    | 9           | Age-related hearing loss | 334.3 [233.7-462]        | 3.0             | 0.0             |
|                    | 10          | Neck pain                | 327.1 [216.4-474.1]      | 9.9             | -0.3            |
| Calabria - South   | 1           | Low back pain            | 1054.1 [751.7-1405.7]    | -2.0            | 0.6             |
|                    | 2           | Headache disorders       | 826 [136.6-1769.8]       | -1.8            | -1.4            |
|                    | 3           | Anxiety disorders        | 659.1 [458.9-908.5]      | -1.8            | 19.1            |
|                    | 4           | Depressive disorders     | 607.4 [416.7-838.1]      | -1.2            | 21.0            |
|                    | 5           | Falls                    | 543.6 [367.8-756.3]      | -8.3            | -0.1            |
|                    | 6           | Diabetes mellitus        | 396.1 [275.7-544.4]      | -7.9            | 5.8             |
|                    | 7           | Other musculoskeletal    | 385.3 [257-555.5]        | 15.1            | 3.0             |
|                    | 8           | Gynaecological diseases  | 374.2 [261.4-527.2]      | 14.3            | -0.7            |
|                    | 9           | Age-related hearing loss | 335.4 [231.4-465.2]      | 2.6             | -0.1            |
|                    | 10          | Neck pain                | 328 [215.5-473.8]        | 7.6             | -0.3            |
| Sicilia - Islands  | 1           | Low back pain            | 1054.8 [742.2-1418.2]    | -2.2            | 0.6             |
|                    | 2           | Headache disorders       | 768.7 [137.7-1622.4]     | -1.9            | 9.1             |
|                    | 3           | Anxiety disorders        | 655.8 [457.7-903.6]      | -2.6            | 16.0            |
|                    | 4           | Depressive disorders     | 605.7 [410.3-834.2]      | 2.1             | 20.8            |
|                    | 5           | Diabetes mellitus        | 590.3 [403.9-801.8]      | 10.8            | 4.1             |
|                    | 6           | Other musculoskeletal    | 405.7 [272.8-579.7]      | -10.2           | 3.2             |
|                    | 7           | Falls                    | 404.3 [277-555.5]        | -9.2            | -0.4            |
|                    | 8           | Gynaecological diseases  | 387.3 [270.4-540.8]      | 13.5            | -0.9            |
|                    | 9           | Age-related hearing loss | 333.9 [231.4-459.8]      | 0.1             | 0.1             |
|                    | 10          | Neck pain                | 327.5 [218.1-471.5]      | 0.0             | -0.3            |

| Region             | Rank (2019) | Cause                    | YLDs per 100000 [95% UI] | Change 2000 (%) | Change 2021 (%) |
|--------------------|-------------|--------------------------|--------------------------|-----------------|-----------------|
| Sardegna - Islands | 1           | Low back pain            | 1071.6 [756.2-1429.4]    | -1.9            | 0.6             |
|                    | 2           | Headache disorders       | 821.7 [136.6-1759]       | -2.2            | -2.1            |
|                    | 3           | Depressive disorders     | 684.1 [468.3-942.6]      | -3.6            | 14.3            |
|                    | 4           | Anxiety disorders        | 488.4 [330-673]          | -15.4           | 19.4            |
|                    | 5           | Falls                    | 486.7 [333.1-670.2]      | 5.7             | 1.5             |
|                    | 6           | Diabetes mellitus        | 453.8 [316-629.5]        | 8.4             | 6.7             |
|                    | 7           | Other musculoskeletal    | 383.5 [264-543.3]        | 3.3             | 3.4             |
|                    | 8           | Gynaecological diseases  | 371.1 [260.2-518.4]      | 11.2            | -0.6            |
|                    | 9           | Age-related hearing loss | 334.6 [233.2-459.4]      | 0.9             | 0.0             |
|                    | 10          | Neck pain                | 327.1 [216-469.8]        | 0.0             | -0.2            |

Change 2000: YLL rate change (%) from 2000 to 2019; Change 2021: YLL rate change (%) from 2019 to 2021;

Abbreviations: UI: Uncertainty Interval.

Figure S9. Trends of all-age Years of Life Lost (YLLs) by region in Italy between 2000 and 2021 for females (a) and males (b).

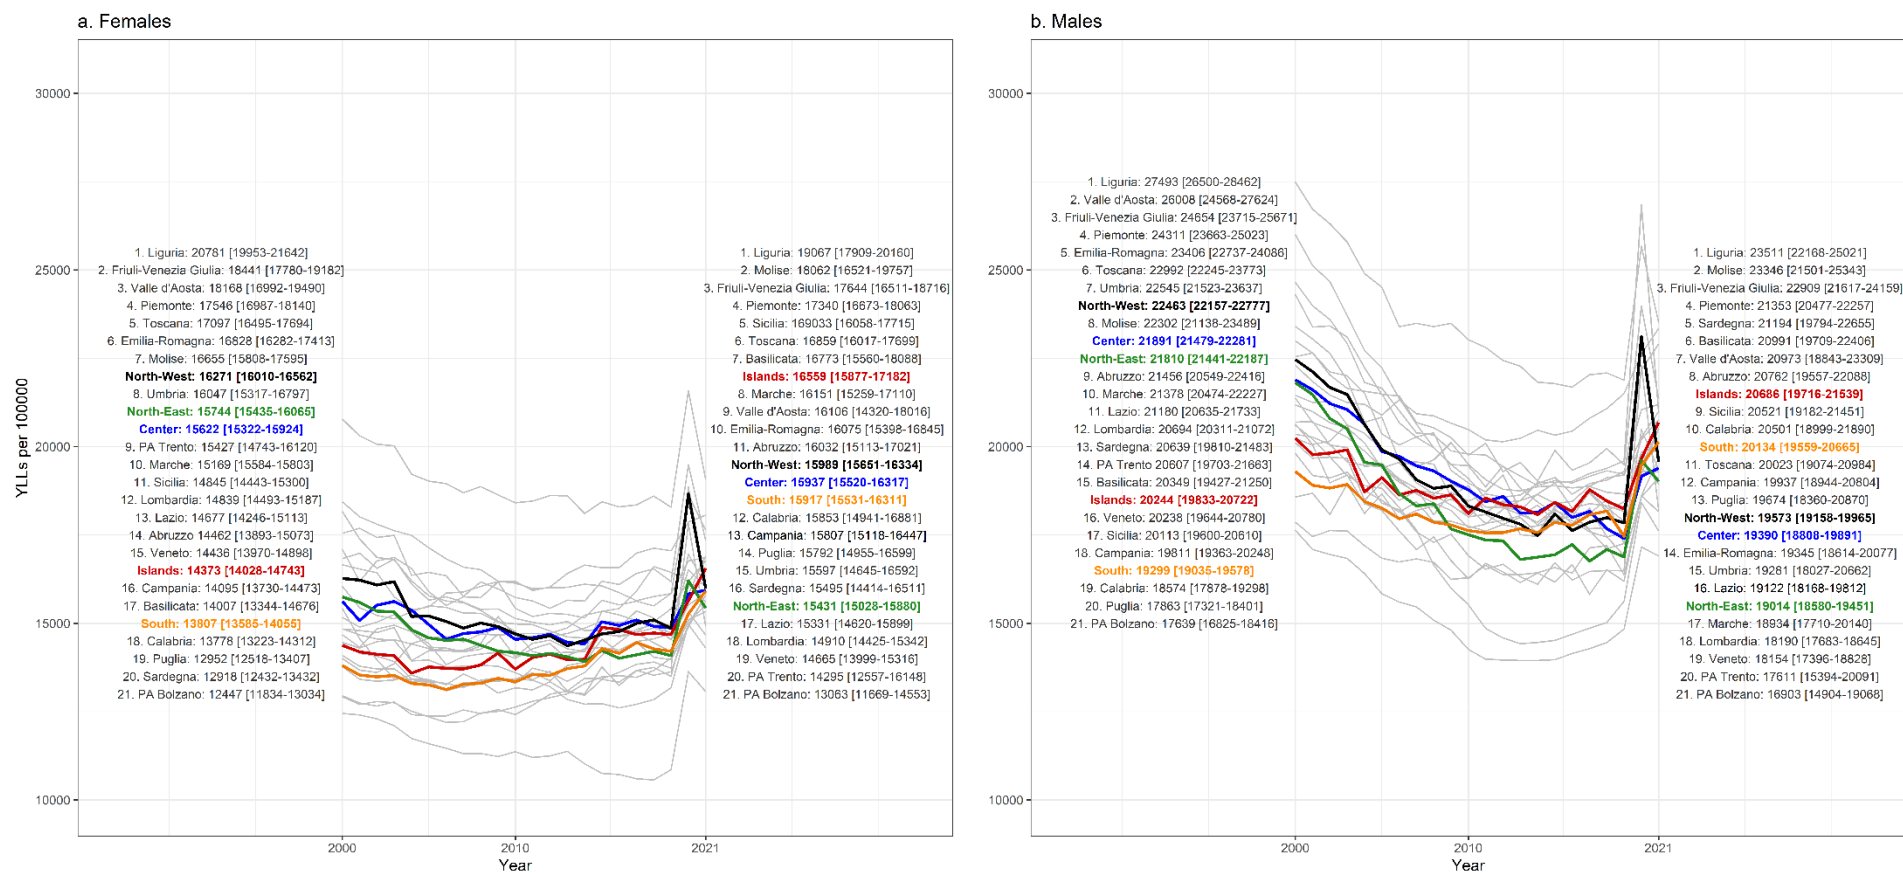

Figure S10. Leading causes of all-age Years of Life Lost (YLLs) in Italy in 2000 and 2019 – Both sexes.

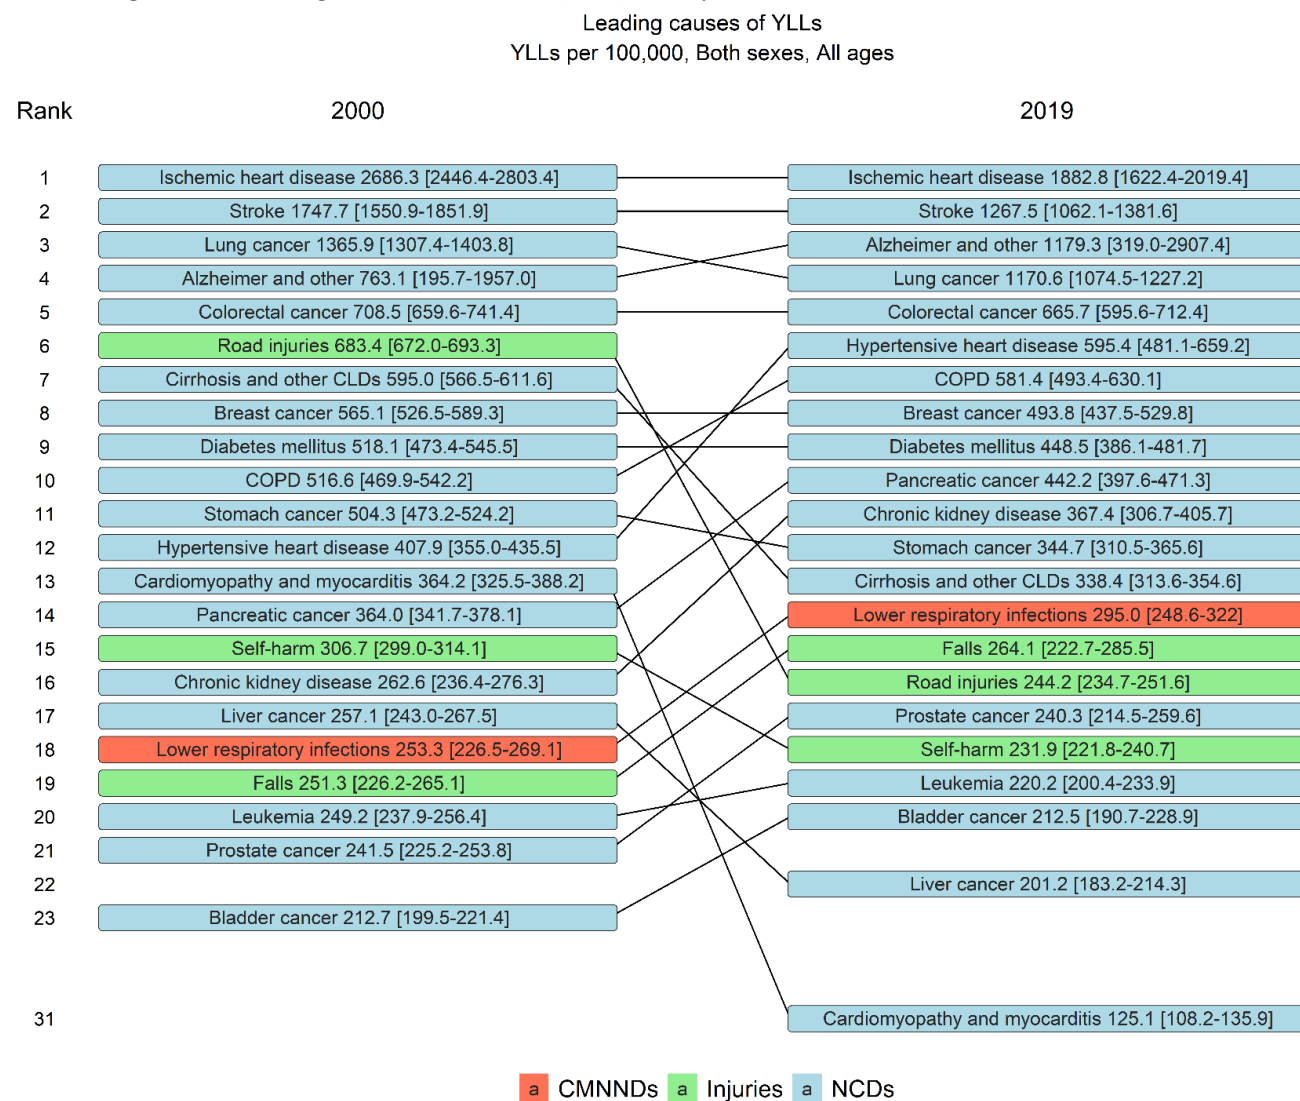

Abbreviations: CLDs: Chronic Liver Diseases; COPD: Chronic Obstructive Pulmonary Disease; CMNNDs: Communicable, Maternal, Neonatal and Nutritional Diseases; NCDs: Non-Communicable Diseases.

Figure S11a. Leading causes of all-age Years of Life Lost (YLLs) in Italy in 2000 and 2019 - Males.

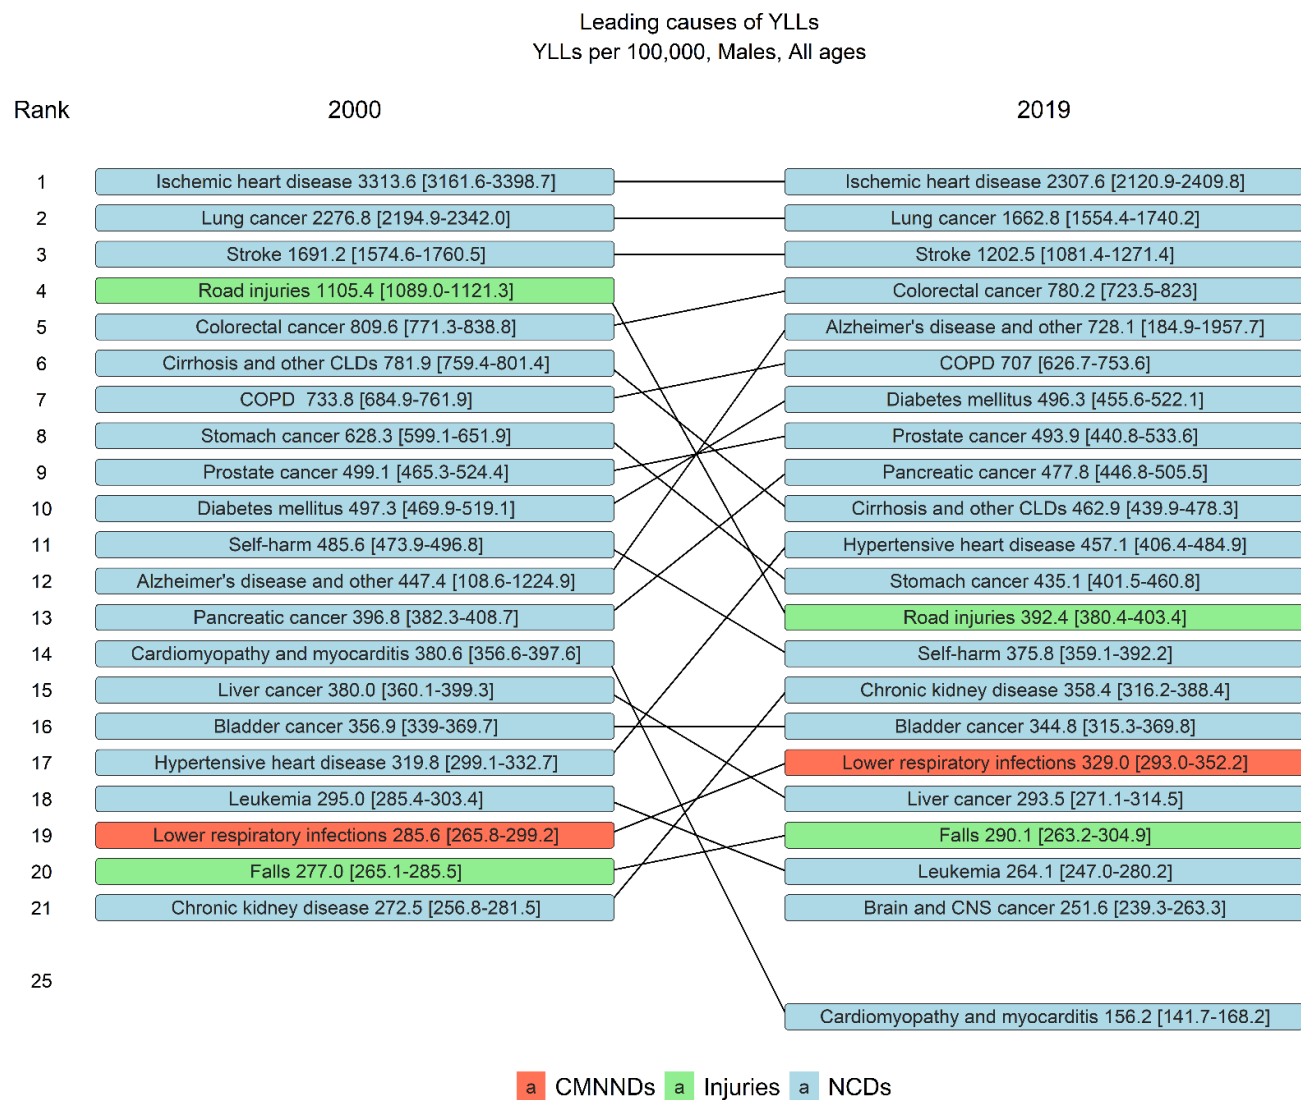

Abbreviations: CLDs: Chronic Liver Diseases; COPD: Chronic Obstructive Pulmonary Disease; CNS: Central Nervous System; CMNNDs: Communicable, Maternal, Neonatal and Nutritional Diseases; NCDs: Non-Communicable Diseases.

Figure S11b. Leading causes of all-age Years of Life Lost (YLLs) in Italy in 2000 and 2019 - Females.

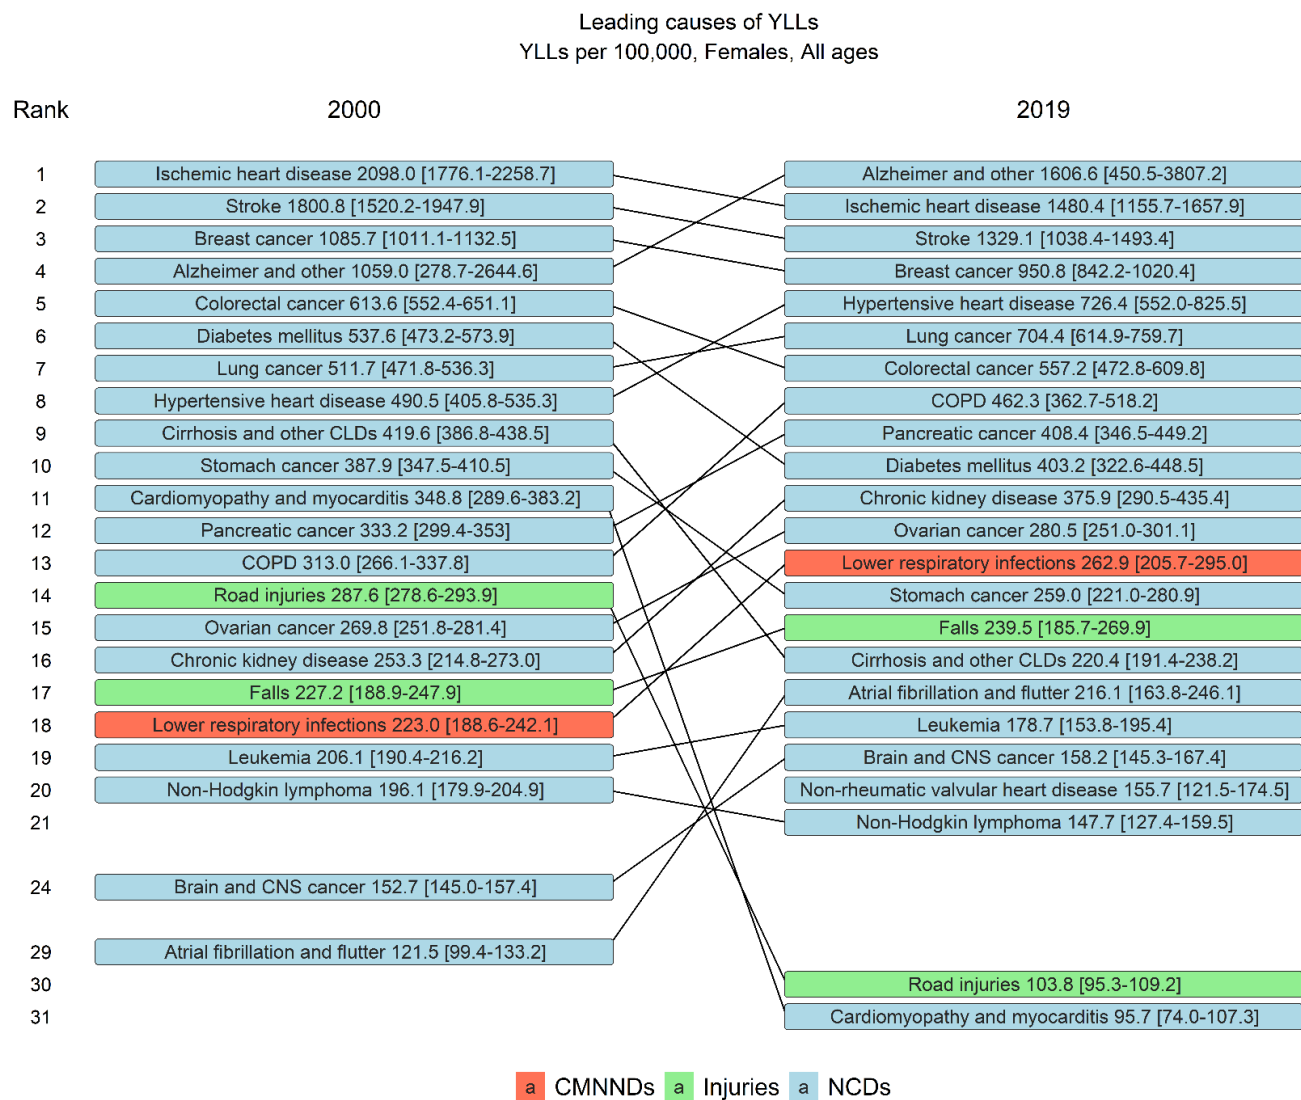

Abbreviations: CLDs: Chronic Liver Diseases; COPD: Chronic Obstructive Pulmonary Disease; CNS: Central Nervous System; CMNNDs: Communicable, Maternal, Neonatal and Nutritional Diseases; NCDs: Non-Communicable Diseases.

Figure S12. Trends of age-standardised Years of Life Lost (YLLs) by region in Italy between 2000 and 2021 for females (a) and males (b).

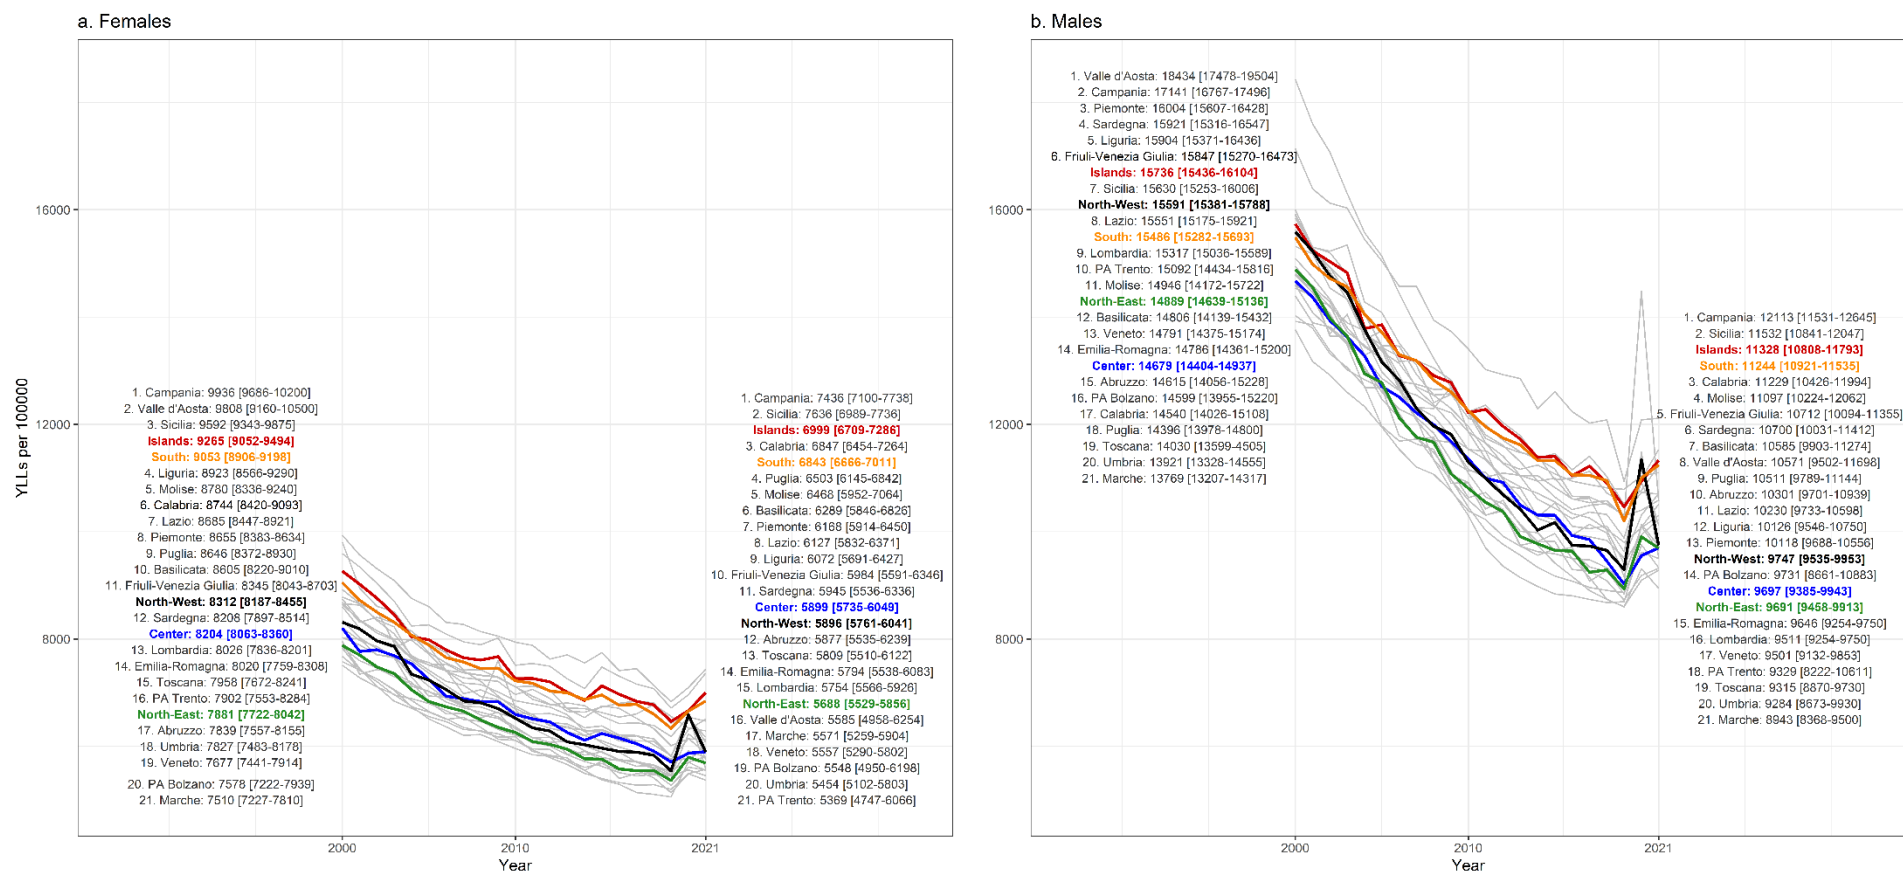

Figure S13. Leading causes of age-standardised Years of Life Lost (YLLs) in Italy in 2000 and 2019 – Both sexes.

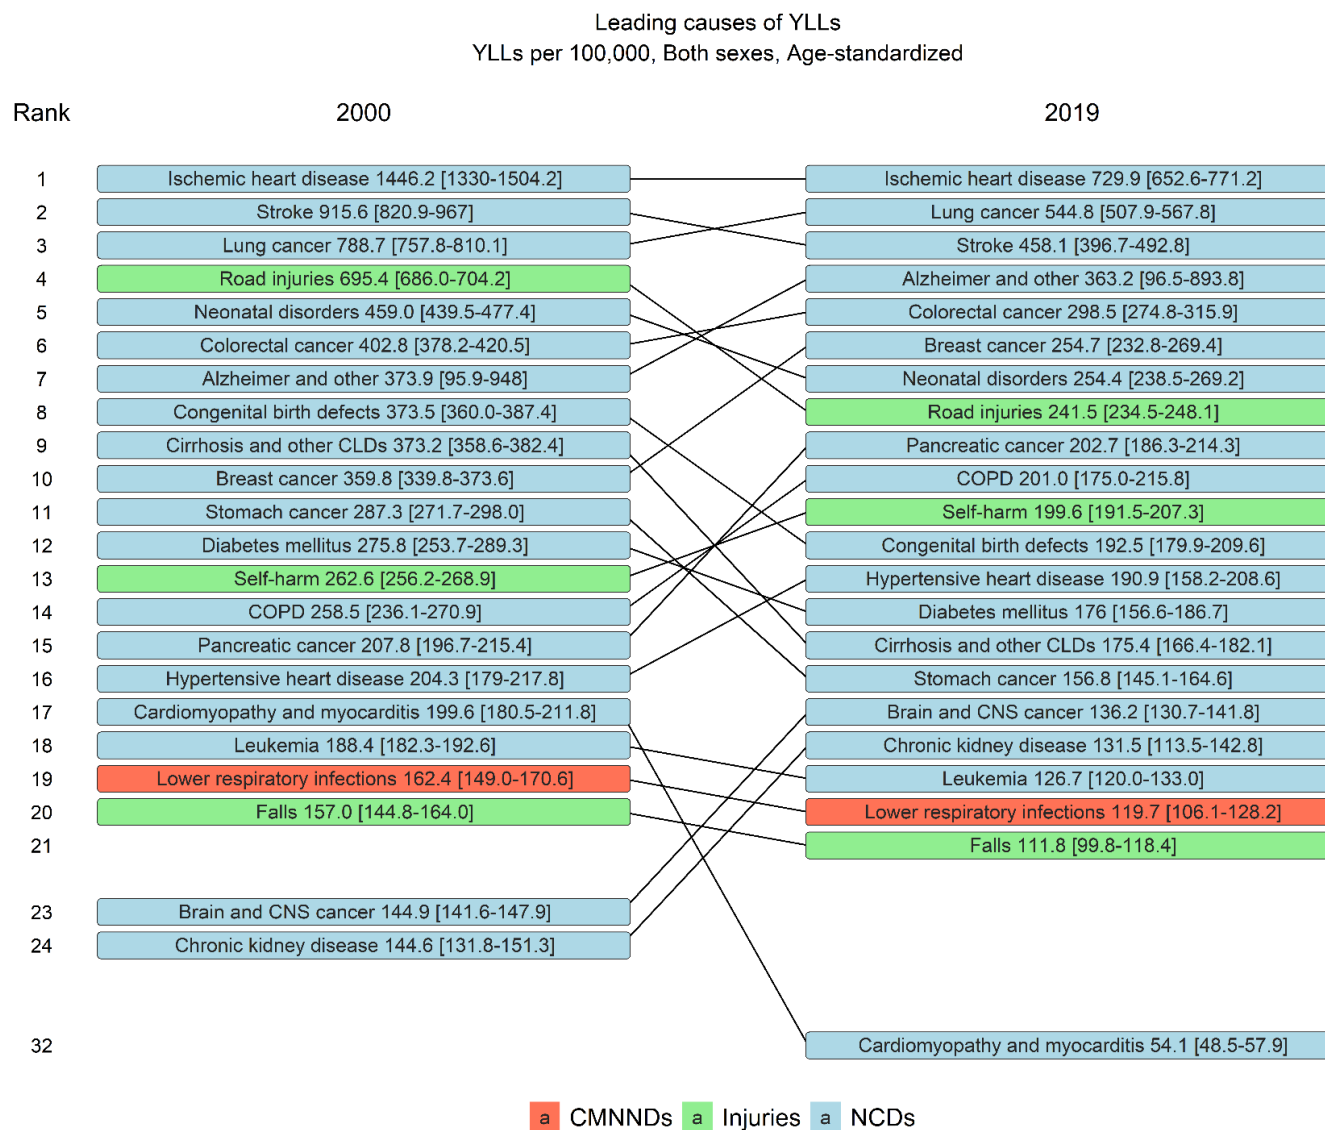

Abbreviations: CLDs: Chronic Liver Diseases; COPD: Chronic Obstructive Pulmonary Disease; CNS: Central Nervous System; CMNNDs: Communicable, Maternal, Neonatal and Nutritional Diseases; NCDs: Non-Communicable Diseases.

Figure S14a. Leading causes of age-standardised Years of Life Lost (YLLs) in Italy in 2000 and 2019 - Males.

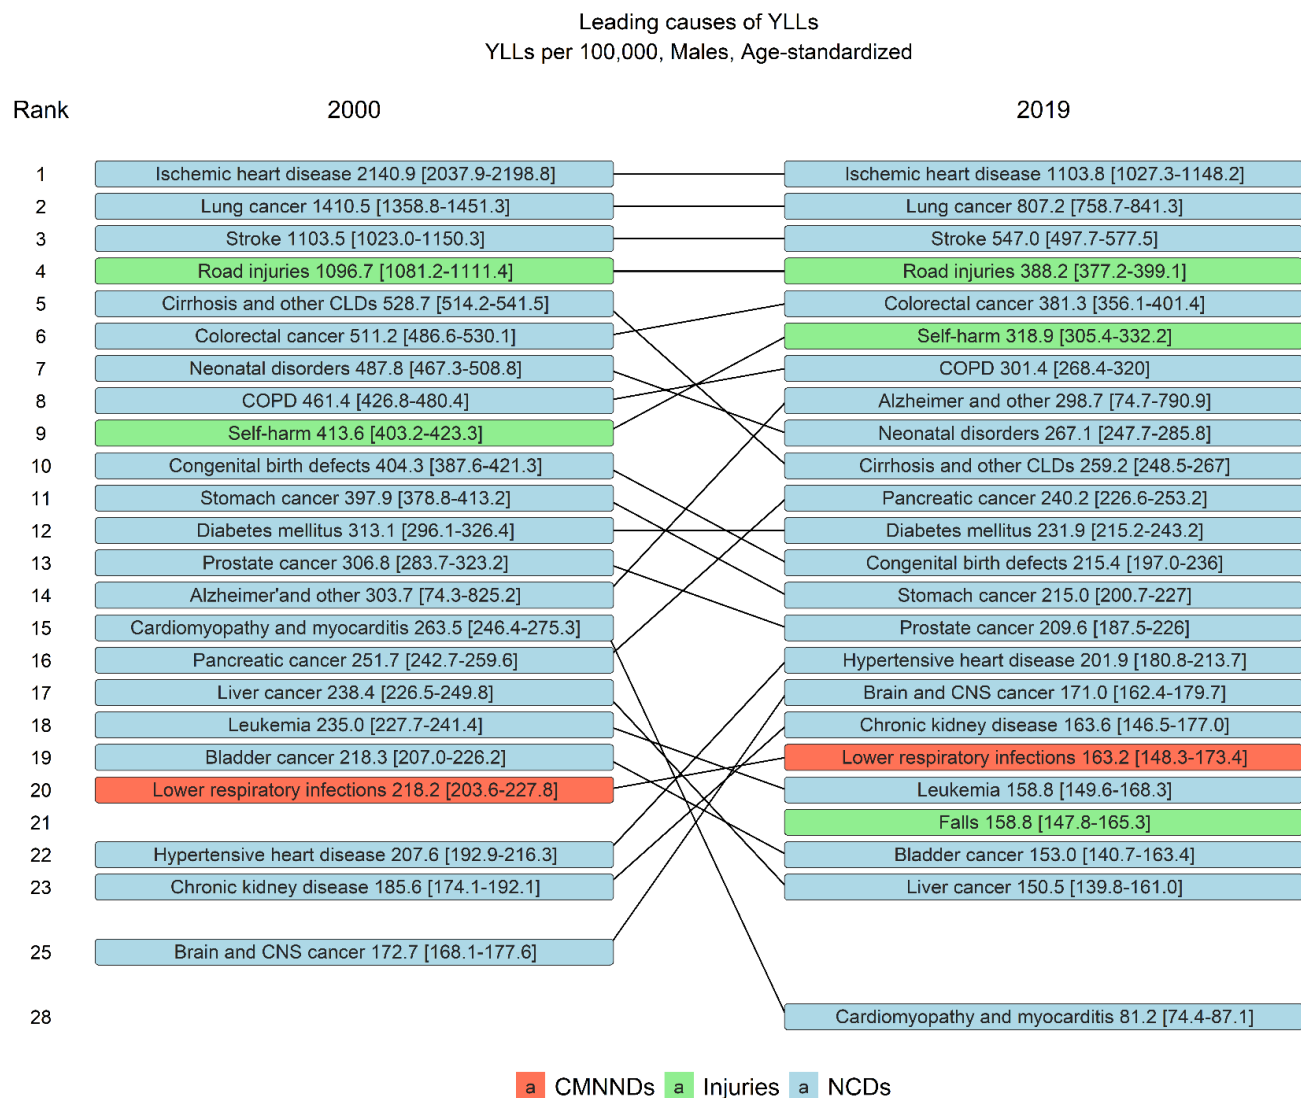

Abbreviations: CLDs: Chronic Liver Diseases; COPD: Chronic Obstructive Pulmonary Disease; CNS: Central Nervous System; CMNNDs: Communicable, Maternal, Neonatal and Nutritional Diseases; NCDs: Non-Communicable Diseases.

Figure S14b. Leading causes of age-standardised Years of Life Lost (YLLs) in Italy in 2000 and 2019 - Females.

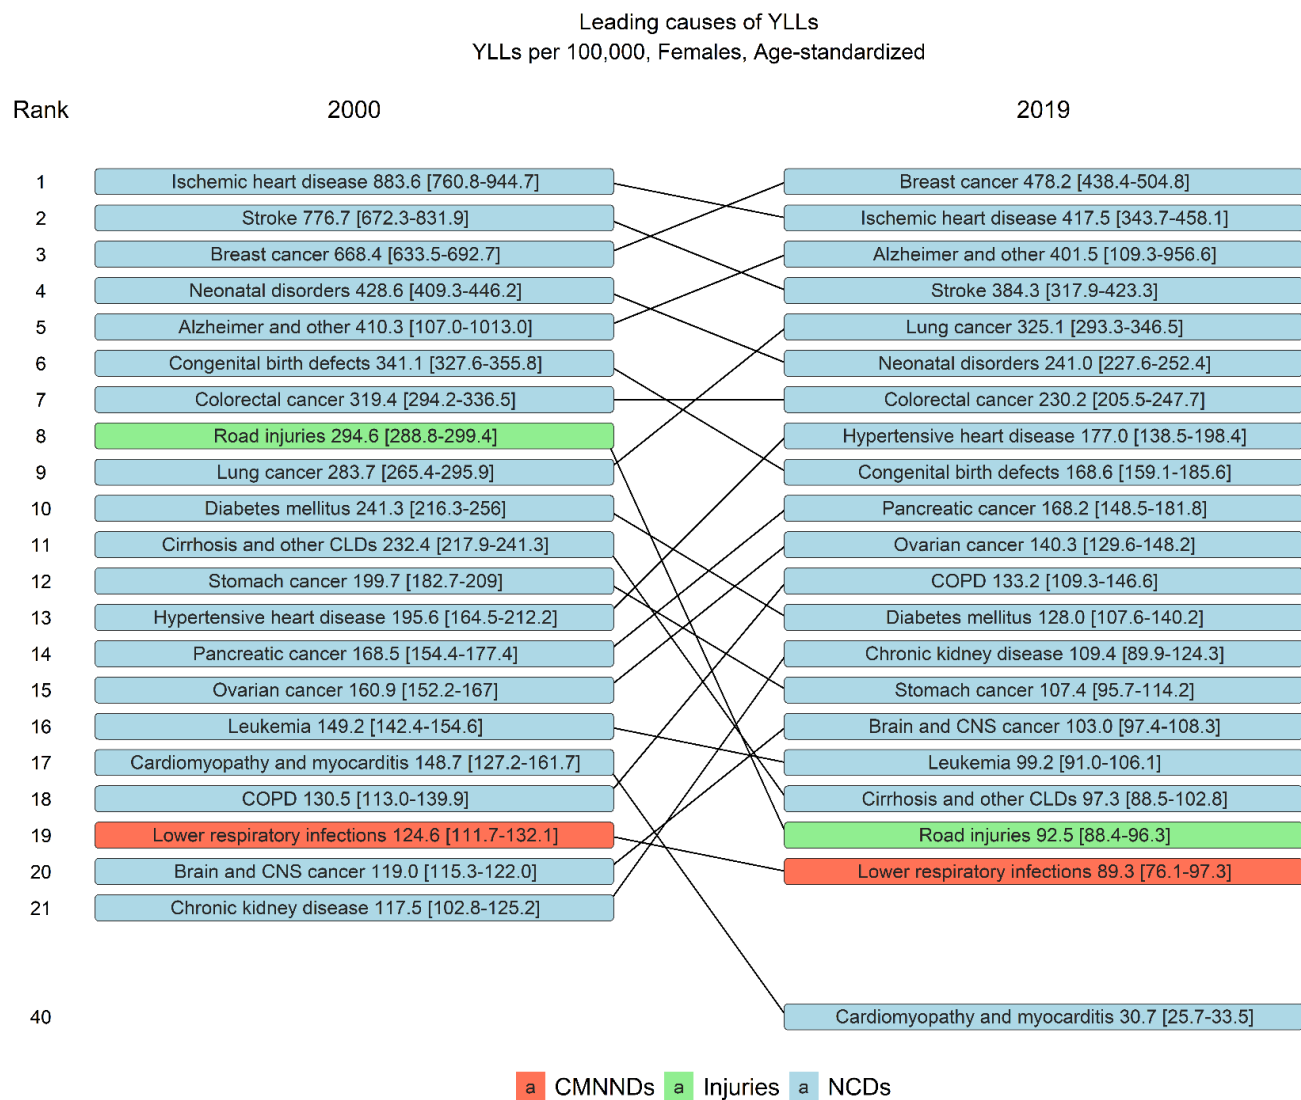

Abbreviations: CLDs: Chronic Liver Diseases; COPD: Chronic Obstructive Pulmonary Disease; CNS: Central Nervous System; CMNNDs: Communicable, Maternal, Neonatal and Nutritional Diseases; NCDs: Non-Communicable Diseases.

Figure S15. Ten leading causes of age-standardised Years of Life Lost (YLLs) in 2019 in Italy and in the five macro-regions. Rate are expressed per 100,000 people.

| Italy     |                        |                     |                          |                          | North-West |                        |                     |                          |                          |
|-----------|------------------------|---------------------|--------------------------|--------------------------|------------|------------------------|---------------------|--------------------------|--------------------------|
| Rank 2019 | Cause                  | YLL rate (95% UI)   | Change from 2000 to 2019 | Change from 2019 to 2021 | Rank 2019  | Cause                  | YLL rate (95% UI)   | Change from 2000 to 2019 | Change from 2019 to 2021 |
| 1         | Ischemic heart disease | 729.9 (652.6-771.2) | -52.1%                   | -4.8%                    | 1          | Ischemic heart disease | 662.5 (589.7-704.1) | -52.1%                   | -4.8%                    |
| 2         | Lung cancer            | 544.8 (507.9-567.8) | -35.0%                   | -3.9%                    | 2          | Lung cancer            | 557.9 (514.2-593.5) | -35.0%                   | -3.9%                    |
| 3         | Stroke                 | 458.1 (396.7-492.8) | -49.1%                   | -4.6%                    | 3          | Stroke                 | 441.2 (377.0-478.9) | -49.1%                   | -4.6%                    |
| 4         | Alzheimer and other    | 363.2 (96.5-893.8)  | -3.3%                    | -3.8%                    | 4          | Alzheimer and other    | 366.7 (99.0-889.3)  | -3.3%                    | -3.8%                    |
| 5         | Colorectal cancer      | 298.5 (274.8-315.9) | -31.0%                   | -4.0%                    | 5          | Colorectal cancer      | 289.4 (262.3-314.8) | -31.0%                   | -4.0%                    |
| 6         | Breast cancer          | 254.7 (238.5-269.2) | -34.5%                   | -5.1%                    | 6          | Breast cancer          | 249.7 (224.0-269.0) | -34.5%                   | -5.1%                    |
| 7         | Neonatal disorders     | 254.4 (238.5-269.2) | -70.0%                   | -9.9%                    | 7          | Road injuries          | 226.2 (217.3-234.8) | -70.0%                   | -9.9%                    |
| 8         | Road injuries          | 241.5 (234.5-248.1) | -39.8%                   | -3.4%                    | 8          | Neonatal disorders     | 221.6 (203.1-242.4) | -39.8%                   | -3.4%                    |
| 9         | Pancreatic cancer      | 202.7 (186.3-214.3) | -23.2%                   | -10.6%                   | 9          | Self-harm              | 215.8 (204.9-226)   | -23.2%                   | -10.6%                   |
| 10        | COPD                   | 201.0 (175.0-215.8) | -5.1%                    | -3.5%                    | 10         | Pancreatic cancer      | 212.3 (194.5-226.5) | -5.1%                    | -3.5%                    |

  

| North-East |                        |                     |                          |                          | Center    |                        |                     |                          |                          |
|------------|------------------------|---------------------|--------------------------|--------------------------|-----------|------------------------|---------------------|--------------------------|--------------------------|
| Rank 2019  | Cause                  | YLL rate (95% UI)   | Change from 2000 to 2019 | Change from 2019 to 2021 | Rank 2019 | Cause                  | YLL rate (95% UI)   | Change from 2000 to 2019 | Change from 2019 to 2021 |
| 1          | Ischemic heart disease | 622.2 (549-663.6)   | -55.0%                   | -5.6%                    | 1         | Ischemic heart disease | 720.7 (641.8-766.8) | -50.1%                   | -2.8%                    |
| 2          | Lung cancer            | 500.4 (460.6-530.5) | -38.5%                   | -7.6%                    | 2         | Lung cancer            | 558.9 (515.9-591.5) | -28.2%                   | -4.0%                    |
| 3          | Alzheimer and other    | 372.4 (100.3-915.5) | -4.2%                    | -3.3%                    | 3         | Stroke                 | 439.3 (382-472.2)   | -50.4%                   | -3.5%                    |
| 4          | Stroke                 | 365.7 (312.5-397.7) | -48.2%                   | -5.1%                    | 4         | Alzheimer and other    | 340.5 (88.6-852.0)  | -1.8%                    | -4.0%                    |
| 5          | Colorectal cancer      | 276.9 (246.6-300.0) | -33.5%                   | -7.2%                    | 5         | Colorectal cancer      | 294.6 (266.7-321.4) | -29.6%                   | -4.0%                    |
| 6          | Road injuries          | 264.7 (255.1-273.9) | -69.2%                   | -7.2%                    | 6         | Breast cancer          | 248.2 (226.9-264.9) | -27.7%                   | -6.6%                    |
| 7          | Breast cancer          | 233.4 (211.8-248.8) | -34.2%                   | -9.0%                    | 7         | Road injuries          | 246.1 (236.5-255.3) | -65.1%                   | -4.9%                    |
| 8          | Self-harm              | 229.1 (218.6-238.1) | -26.2%                   | -10.4%                   | 8         | Neonatal disorders     | 218.8 (203.7-232.8) | -49.8%                   | -11.0%                   |
| 9          | Pancreatic cancer      | 217.5 (197.5-231.7) | -7.5%                    | -6.9%                    | 9         | Pancreatic cancer      | 194.8 (178.8-207.7) | -3.3%                    | -3.7%                    |
| 10         | Neonatal disorders     | 212.2 (194.5-227.7) | -36.3%                   | -4.6%                    | 10        | COPD                   | 187.3 (162.5-201.3) | -17.9%                   | -2.6%                    |

  

| South     |                            |                     |                          |                          | Islands   |                            |                     |                          |                          |
|-----------|----------------------------|---------------------|--------------------------|--------------------------|-----------|----------------------------|---------------------|--------------------------|--------------------------|
| Rank 2019 | Cause                      | YLL rate (95% UI)   | Change from 2000 to 2019 | Change from 2019 to 2021 | Rank 2019 | Cause                      | YLL rate (95% UI)   | Change from 2000 to 2019 | Change from 2019 to 2021 |
| 1         | Ischemic heart disease     | 888.6 (801.4-942.2) | -42.9%                   | -1.2%                    | 1         | Ischemic heart disease     | 802.3 (720.1-851.7) | -45.8%                   | -0.5%                    |
| 2         | Lung cancer                | 551.0 (517.1-581.2) | -24.7%                   | -1.4%                    | 2         | Stroke                     | 587.2 (508.6-637.1) | -51.4%                   | -1.0%                    |
| 3         | Stroke                     | 519.8 (458.7-557.5) | -51.7%                   | -1.7%                    | 3         | Lung cancer                | 547.9 (505-586.5)   | -20.7%                   | -1.0%                    |
| 4         | Alzheimer and other        | 355.1 (93.1-889.4)  | -2.1%                    | -2.8%                    | 4         | Alzheimer and other        | 396.8 (104.4-958.9) | -2.2%                    | -3.8%                    |
| 5         | Colorectal cancer          | 314.3 (286.5-339.2) | -13.0%                   | -1.4%                    | 5         | Neonatal disorders         | 350.8 (325.5-375.3) | -44.6%                   | 0.2%                     |
| 6         | Neonatal disorders         | 310.2 (288.5-331.7) | -44.9%                   | -2.0%                    | 6         | Colorectal cancer          | 334.0 (300.6-367.2) | -13.7%                   | -0.9%                    |
| 7         | Hypertensive heart disease | 283.5 (237.5-308.3) | -7.4%                    | -2.3%                    | 7         | Breast cancer              | 282.6 (258.1-304.3) | -25.0%                   | -2.5%                    |
| 8         | Breast cancer              | 270.0 (250.0-286.9) | -21.1%                   | -3.2%                    | 8         | Road injuries              | 258.3 (247.0-269.3) | -55.9%                   | -11.4%                   |
| 9         | COPD                       | 261.1 (229.0-280.4) | -24.1%                   | -0.8%                    | 9         | Hypertensive heart disease | 255.4 (213.1-282.9) | -9.9%                    | -1.4%                    |
| 10        | Diabetes mellitus          | 257.4 (230.6-274.6) | -35.4%                   | -0.7%                    | 10        | Congenital birth defects   | 249.0 (229.4-275.6) | -48.3%                   | -2.4%                    |

NCDs CMNNDs Injuries

Change 2000: YLL rate change (%) from 2000 to 2019; Change 2021: YLL rate change (%) from 2019 to 2021;

Abbreviations: COPD: Chronic Obstructive Pulmonary Disease; NCDs: Non-Communicable Diseases; CMNNDs: Communicable, Maternal, Neonatal, Nutritional Disorders.

Table S3. Ten leading causes of all-age Years of Life Lost (YLLs) in 2019 by region.

| Region                     | Rank (2019) | Cause                        | YLLs per 100000 [95% UI] | Change 2000 (%) | Change 2021 (%) |
|----------------------------|-------------|------------------------------|--------------------------|-----------------|-----------------|
| Piemonte - North-West      | 1           | Ischemic heart disease       | 1901.5 [1633.4-2050.2]   | -30.2           | 0.3             |
|                            | 2           | Stroke                       | 1635.3 [1361.5-1797.3]   | -26.3           | 0.0             |
|                            | 3           | Lung cancer                  | 1314.8 [1186.4-1427]     | -20.5           | 16.5            |
|                            | 4           | Alzheimer and other          | 1289.1 [346-3231.1]      | 48.4            | 2.6             |
|                            | 5           | Colorectal cancer            | 764.3 [671.6-857.6]      | -9.8            | 65.5            |
|                            | 6           | COPD                         | 681.9 [580.5-744.1]      | -13.7           | 12.7            |
|                            | 7           | Hypertensive heart disease   | 621.1 [497.2-692.3]      | -5.2            | 11.5            |
|                            | 8           | Breast cancer                | 537.7 [465.3-596.3]      | -15.1           | 15.0            |
|                            | 9           | Pancreatic cancer            | 453.4 [399.6-491.2]      | -24.1           | 17.2            |
|                            | 10          | Lower respiratory infections | 444.4 [371.9-493.8]      | -21.8           | 3.2             |
| Valle d'Aosta - North-West | 1           | Ischemic heart disease       | 1913 [1626.4-2108.5]     | -33.9           | 1.6             |
|                            | 2           | Stroke                       | 1353.8 [1091.3-1522.7]   | -29.1           | 3.9             |
|                            | 3           | Alzheimer and other          | 1195.3 [318.9-2861.9]    | -19.2           | 16.6            |
|                            | 4           | Lung cancer                  | 1158.1 [1013-1313]       | 36.4            | 1.6             |
|                            | 5           | COPD                         | 692.4 [573.6-771]        | -12.3           | 67.1            |
|                            | 6           | Colorectal cancer            | 642.4 [547.4-740.2]      | -17.4           | 10.4            |
|                            | 7           | Breast cancer                | 490.6 [406.5-573.8]      | -36.8           | 31.8            |
|                            | 8           | Hypertensive heart disease   | 482.5 [385.4-550.8]      | -30.4           | 2.8             |
|                            | 9           | Pancreatic cancer            | 453 [398.8-503.9]        | -32.7           | 9.5             |
|                            | 10          | Lower respiratory infections | 420.6 [341.9-473.4]      | -36.0           | 8.9             |

| Region                  | Rank (2019) | Cause                        | YLLs per 100000 [95% UI] | Change 2000 (%) | Change 2021 (%) |
|-------------------------|-------------|------------------------------|--------------------------|-----------------|-----------------|
| Lombardia - North-West  | 1           | Ischemic heart disease       | 1673 [1414.8-1817.4]     | -35.5           | -1.2            |
|                         | 2           | Lung cancer                  | 1214.2 [1095.1-1317.4]   | -19.4           | 34.6            |
|                         | 3           | Alzheimer and other          | 1212.9 [340.4-2907.1]    | -17.9           | 0.5             |
|                         | 4           | Stroke                       | 1119.8 [911.1-1241.9]    | 45.7            | 7.1             |
|                         | 5           | Colorectal cancer            | 615.3 [533.8-695]        | -14.0           | 79.8            |
|                         | 6           | COPD                         | 497.7 [405.4-549.8]      | -28.3           | 22.3            |
|                         | 7           | Breast cancer                | 495.7 [424.5-549.5]      | -19.5           | 1.1             |
|                         | 8           | Pancreatic cancer            | 490.5 [429.2-533.2]      | -17.6           | -0.8            |
|                         | 9           | Stomach cancer               | 397.9 [352.5-436.8]      | -27.7           | 21.5            |
|                         | 10          | Hypertensive heart disease   | 393.7 [310.4-444.3]      | -5.0            | -1.3            |
| AP Bolzano - North-East | 1           | Ischemic heart disease       | 1457 [1242.1-1603.5]     | -38.3           | 52.3            |
|                         | 2           | Alzheimer and other          | 994.4 [270.4-2367]       | -16.2           | 50.5            |
|                         | 3           | Stroke                       | 872 [716.9-972.5]        | -8.0            | 14.5            |
|                         | 4           | Lung cancer                  | 839 [748.5-930.8]        | 13.7            | 9.6             |
|                         | 5           | Colorectal cancer            | 556.7 [480.1-634.1]      | -14.1           | 43.3            |
|                         | 6           | COPD                         | 410 [341.6-452.5]        | -35.3           | 33.8            |
|                         | 7           | Pancreatic cancer            | 400.1 [352.3-436.7]      | -13.0           | 6.6             |
|                         | 8           | Hypertensive heart disease   | 374.3 [291.1-428.4]      | -16.9           | 10.0            |
|                         | 9           | Breast cancer                | 361.6 [310-408.1]        | -15.7           | 8.9             |
|                         | 10          | Lower respiratory infections | 319.8 [268.1-356.7]      | -23.3           | 10.2            |
| AP Trento - North-East  | 1           | Ischemic heart disease       | 1735.3 [1422.6-1922.3]   | -43.8           | 9.9             |
|                         | 2           | Alzheimer and other          | 1214.2 [319.8-2922.5]    | -5.6            | 45.1            |
|                         | 3           | Lung cancer                  | 977.9 [861.4-1078.9]     | -22.9           | 21.0            |
|                         | 4           | Stroke                       | 855.3 [685.5-960.2]      | 12.3            | 8.6             |
|                         | 5           | Colorectal cancer            | 607.7 [513.7-694.5]      | -19.2           | 43.3            |
|                         | 6           | Breast cancer                | 462.9 [386.9-523.2]      | -24.7           | 27.2            |
|                         | 7           | Pancreatic cancer            | 432.9 [380.8-475.8]      | -28.0           | -1.4            |
|                         | 8           | Hypertensive heart disease   | 409.5 [312.8-467.7]      | -31.5           | 2.6             |
|                         | 9           | COPD                         | 401.9 [332.2-449]        | -18.5           | 2.9             |
|                         | 10          | Cirrhosis and other CLDs     | 324.9 [291.3-353.6]      | -28.4           | 26.7            |

| Region                             | Rank (2019) | Cause                        | YLLs per 100000 [95% UI] | Change 2000 (%) | Change 2021 (%) |
|------------------------------------|-------------|------------------------------|--------------------------|-----------------|-----------------|
| Veneto - North East                | 1           | Ischemic heart disease       | 1657.7 [1412.2-1803.9]   | -32.1           | 15.9            |
|                                    | 2           | Alzheimer and other          | 1176.1 [314.5-2869.4]    | -20.6           | 39.2            |
|                                    | 3           | Lung cancer                  | 1047.5 [934.5-1140.5]    | -21.6           | 14.2            |
|                                    | 4           | Stroke                       | 1038.6 [851.9-1151.1]    | 27.8            | -1.1            |
|                                    | 5           | Colorectal cancer            | 626.4 [530.8-706.9]      | -19.2           | 61.9            |
|                                    | 6           | Hypertensive heart disease   | 537.1 [424.2-603.4]      | -24.2           | 13.4            |
|                                    | 7           | Pancreatic cancer            | 475.5 [415.3-520]        | -14.9           | 12.3            |
|                                    | 8           | Breast cancer                | 471.1 [409-524.5]        | -11.6           | -1.8            |
|                                    | 9           | COPD                         | 416.8 [344.6-461.7]      | -2.8            | 7.3             |
|                                    | 10          | Diabetes mellitus            | 367 [312.2-408]          | -13.3           | 13.6            |
| Friuli-Venezia Giulia - North-East | 1           | Ischemic heart disease       | 2040.9 [1731.3-2231.7]   | -38.2           | 61.7            |
|                                    | 2           | Alzheimer and other          | 1354.9 [370-3316.6]      | -19.9           | 47.5            |
|                                    | 3           | Stroke                       | 1302.7 [1066.3-1445.7]   | -20.1           | 1.5             |
|                                    | 4           | Lung cancer                  | 1208.6 [1082.9-1317.5]   | 25.5            | 5.7             |
|                                    | 5           | Colorectal cancer            | 757.9 [655.1-853.1]      | -18.8           | 54.3            |
|                                    | 6           | COPD                         | 591.5 [489.3-656.6]      | -24.8           | 24.2            |
|                                    | 7           | Breast cancer                | 571.4 [487.2-638.2]      | -21.8           | 3.7             |
|                                    | 8           | Pancreatic cancer            | 565 [500.4-621.5]        | -22.4           | -2.8            |
|                                    | 9           | Hypertensive heart disease   | 549.2 [435.7-623.4]      | -13.8           | -2.6            |
|                                    | 10          | Lower respiratory infections | 403.7 [333.9-447.7]      | -27.0           | 31.5            |
| Liguria - North-West               | 1           | Ischemic heart disease       | 2241.4 [1877-2452]       | -39.5           | -2.0            |
|                                    | 2           | Stroke                       | 1700.6 [1388.3-1892.7]   | -23.9           | -0.8            |
|                                    | 3           | Alzheimer and other          | 1627.1 [439.8-3889.9]    | -14.1           | 2.4             |
|                                    | 4           | Lung cancer                  | 1412.8 [1270.6-1548.3]   | 24.1            | 15.1            |
|                                    | 5           | Colorectal cancer            | 866.5 [753.4-967.2]      | -18.8           | 58.4            |
|                                    | 6           | Hypertensive heart disease   | 719.1 [552-818.2]        | -9.8            | 17.2            |
|                                    | 7           | COPD                         | 710.1 [598.9-784.8]      | 6.9             | -0.2            |
|                                    | 8           | Breast cancer                | 589.6 [492.1-666]        | -8.9            | 19.2            |
|                                    | 9           | Pancreatic cancer            | 546.8 [477.6-600.5]      | -14.4           | 2.9             |
|                                    | 10          | Diabetes mellitus            | 521.9 [442.8-580.9]      | -11.2           | 1.9             |

| Region                      | Rank (2019) | Cause                      | YLLs per 100000 [95% UI] | Change 2000 (%) | Change 2021 (%) |
|-----------------------------|-------------|----------------------------|--------------------------|-----------------|-----------------|
| Emilia-Romagna - North-East | 1           | Ischemic heart disease     | 1728.1 [1440.5-1909.5]   | -46.5           | 25.4            |
|                             | 2           | Alzheimer and other        | 1435.5 [400.8-3426.9]    | -15.2           | 18.2            |
|                             | 3           | Lung cancer                | 1188.1 [1051.2-1305.3]   | -25.8           | 19.2            |
|                             | 4           | Stroke                     | 1130.1 [918.2-1266.5]    | 2.0             | 0.2             |
|                             | 5           | Colorectal cancer          | 627.4 [524.7-716.5]      | -27.8           | 76.9            |
|                             | 6           | Hypertensive heart disease | 593.5 [454.3-675.8]      | -29.3           | 1.4             |
|                             | 7           | COPD                       | 542.1 [441.3-606.5]      | -22.6           | 8.4             |
|                             | 8           | Pancreatic cancer          | 502.3 [439.8-548.4]      | -18.4           | 6.7             |
|                             | 9           | Breast cancer              | 455.1 [392.3-500.1]      | -16.5           | 5.9             |
|                             | 10          | Stomach cancer             | 373.3 [322.1-414]        | -20.1           | 15.2            |
| Toscana - Centre            | 1           | Ischemic heart disease     | 1892.3 [1634.9-2040.1]   | -38.6           | 0.0             |
|                             | 2           | Stroke                     | 1565.4 [1298.7-1715.9]   | -30.0           | 5.7             |
|                             | 3           | Lung cancer                | 1253.7 [1141.4-1369]     | -16.8           | 24.1            |
|                             | 4           | Alzheimer and other        | 1219.1 [319.8-3073]      | 40.4            | 1.1             |
|                             | 5           | Colorectal cancer          | 689.9 [596-779.8]        | -19.6           | 77.8            |
|                             | 6           | COPD                       | 616.7 [529.8-675.3]      | -15.4           | 10.2            |
|                             | 7           | Breast cancer              | 526.7 [460.4-579.4]      | -18.3           | 17.4            |
|                             | 8           | Pancreatic cancer          | 460.9 [411-497.4]        | -22.0           | 10.7            |
|                             | 9           | Hypertensive heart disease | 444.5 [359-496.4]        | -22.2           | 2.3             |
|                             | 10          | Diabetes mellitus          | 431 [370.7-474.7]        | -14.7           | 2.5             |
| Umbria - Centre             | 1           | Ischemic heart disease     | 2178.3 [1795.2-2394]     | -36.6           | -2.1            |
|                             | 2           | Stroke                     | 1403 [1142.6-1561.9]     | -33.1           | 5.3             |
|                             | 3           | Alzheimer and other        | 1376.7 [364.1-3406]      | 12.0            | -0.8            |
|                             | 4           | Lung cancer                | 1077.2 [957.8-1189]      | 19.0            | 24.5            |
|                             | 5           | Colorectal cancer          | 693.7 [590.3-781.7]      | -15.3           | 48.5            |
|                             | 6           | COPD                       | 609.5 [502.7-678.6]      | -11.8           | 8.8             |
|                             | 7           | Hypertensive heart disease | 525.2 [411.8-596.8]      | -21.7           | 14.0            |
|                             | 8           | Breast cancer              | 460.9 [394.9-513.7]      | -20.1           | 10.6            |
|                             | 9           | Pancreatic cancer          | 443 [388.1-486.9]        | -17.9           | -4.0            |
|                             | 10          | Diabetes mellitus          | 418.3 [346.8-462.3]      | -15.5           | 0.6             |

| Region          | Rank (2019) | Cause                      | YLLs per 100000 [95% UI] | Change 2000 (%) | Change 2021 (%) |
|-----------------|-------------|----------------------------|--------------------------|-----------------|-----------------|
| Marche - Centre | 1           | Ischemic heart disease     | 2050.8 [1706-2274.8]     | -26.8           | 1.8             |
|                 | 2           | Alzheimer and other        | 1345.4 [356.9-3311.7]    | -29.5           | 20.8            |
|                 | 3           | Stroke                     | 1244.5 [1018.7-1393.2]   | -2.3            | 9.0             |
|                 | 4           | Lung cancer                | 999.2 [878.2-1106.7]     | 10.5            | 27.1            |
|                 | 5           | Colorectal cancer          | 685.2 [590.2-773]        | -12.2           | 44.1            |
|                 | 6           | COPD                       | 556.3 [449.6-621.3]      | -22.9           | 22.5            |
|                 | 7           | Hypertensive heart disease | 497.5 [389.6-565.8]      | -29.5           | 13.9            |
|                 | 8           | Pancreatic cancer          | 458.7 [403.4-502.3]      | -11.0           | 11.3            |
|                 | 9           | Breast cancer              | 439.9 [379.9-495.5]      | -14.0           | 4.1             |
|                 | 10          | Stomach cancer             | 418.9 [363.4-465.5]      | -1.7            | 3.8             |
| Lazio - Centre  | 1           | Ischemic heart disease     | 1967.9 [1707.5-2144]     | -29.6           | 2.6             |
|                 | 2           | Lung cancer                | 1308.1 [1176.2-1417.2]   | -14.3           | 24.5            |
|                 | 3           | Stroke                     | 1094.4 [935.6-1195.9]    | -25.9           | 19.7            |
|                 | 4           | Alzheimer and other        | 1046.5 [283.2-2651.6]    | 40.6            | 6.5             |
|                 | 5           | Colorectal cancer          | 665.1 [572.8-760.6]      | -5.5            | 58.0            |
|                 | 6           | Hypertensive heart disease | 588.5 [484-655.1]        | -10.1           | 13.5            |
|                 | 7           | COPD                       | 544.9 [467.2-597.5]      | -3.4            | 10.5            |
|                 | 8           | Breast cancer              | 483.2 [426.1-529.8]      | -14.2           | 15.1            |
|                 | 9           | Diabetes mellitus          | 433 [374.3-474]          | -15.0           | 8.4             |
|                 | 10          | Pancreatic cancer          | 416 [372.8-455.1]        | -13.9           | 6.1             |
| Abruzzo - South | 1           | Ischemic heart disease     | 2349.2 [2014-2568.6]     | -6.7            | 1.4             |
|                 | 2           | Stroke                     | 1302.8 [1095-1440.7]     | -28.4           | 31.2            |
|                 | 3           | Alzheimer and other        | 1218.8 [325.9-3024.2]    | 12.9            | 7.9             |
|                 | 4           | Lung cancer                | 973 [873.2-1066]         | 21.4            | 25.7            |
|                 | 5           | Hypertensive heart disease | 720.6 [572.1-805.6]      | 2.2             | 34.5            |
|                 | 6           | Colorectal cancer          | 676.1 [597.2-743.2]      | -3.0            | 7.7             |
|                 | 7           | COPD                       | 613.1 [516.2-675.7]      | 0.6             | 9.8             |
|                 | 8           | Diabetes mellitus          | 471.1 [403.4-517.3]      | -19.4           | 32.8            |
|                 | 9           | Breast cancer              | 432.8 [374.5-479.8]      | -25.0           | 10.1            |
|                 | 10          | Chronic kidney disease     | 388.2 [322.4-432.8]      | -22.5           | 7.4             |

| Region           | Rank (2019) | Cause                      | YLLs per 100000 [95% UI] | Change 2000 (%) | Change 2021 (%) |
|------------------|-------------|----------------------------|--------------------------|-----------------|-----------------|
| Molise - South   | 1           | Ischemic heart disease     | 2769.1 [2385.8-3046.5]   | -13.8           | -2.4            |
|                  | 2           | Stroke                     | 1579.6 [1336.9-1748]     | -26.8           | 35.0            |
|                  | 3           | Alzheimer and other        | 1316.5 [347.5-3305.9]    | 41.2            | 16.8            |
|                  | 4           | Lung cancer                | 1044 [932.9-1148.6]      | 22.4            | 24.8            |
|                  | 5           | Hypertensive heart disease | 865.8 [710-969.4]        | 18.6            | 15.9            |
|                  | 6           | Colorectal cancer          | 755.5 [656.2-851.2]      | 4.1             | 12.8            |
|                  | 7           | COPD                       | 664.5 [562.4-735.1]      | -5.6            | 8.7             |
|                  | 8           | Diabetes mellitus          | 629.5 [544.7-696.2]      | -2.0            | 3.4             |
|                  | 9           | Cirrhosis and other CLDs   | 516.5 [468-565.3]        | -10.1           | 19.1            |
|                  | 10          | Chronic kidney disease     | 468 [392.4-524.8]        | -18.3           | 2.8             |
| Campania - South | 1           | Ischemic heart disease     | 2141.1 [1896.1-2299.3]   | -18.3           | 3.7             |
|                  | 2           | Stroke                     | 1327.7 [1149.7-1445.1]   | -28.3           | 38.0            |
|                  | 3           | Lung cancer                | 1250.9 [1145.9-1349.5]   | 0.9             | 9.5             |
|                  | 4           | Alzheimer and other        | 858.9 [226-2139.9]       | -3.0            | 50.2            |
|                  | 5           | COPD                       | 663.2 [576.1-718.3]      | -5.2            | 33.6            |
|                  | 6           | Hypertensive heart disease | 647.1 [532.9-714.3]      | 11.6            | 6.4             |
|                  | 7           | Diabetes mellitus          | 633.5 [563.6-684.6]      | 17.1            | 5.1             |
|                  | 8           | Colorectal cancer          | 626.8 [547.7-702.3]      | 18.7            | 4.9             |
|                  | 9           | Breast cancer              | 487.1 [436.9-534.4]      | -3.1            | 33.0            |
|                  | 10          | Cirrhosis and other CLDs   | 481.6 [449-508.7]        | -1.8            | 3.1             |
| Puglia - South   | 1           | Ischemic heart disease     | 1738 [1487.3-1892]       | -15.2           | 26.9            |
|                  | 2           | Alzheimer and other        | 1056.3 [285.4-2613.9]    | -21.2           | 73.0            |
|                  | 3           | Lung cancer                | 989.6 [894.1-1071.7]     | -7.2            | 10.9            |
|                  | 4           | Stroke                     | 984.1 [821.6-1082.3]     | 52.1            | 4.8             |
|                  | 5           | Hypertensive heart disease | 779.9 [626.8-875.3]      | 25.2            | 31.0            |
|                  | 6           | COPD                       | 668.2 [565.8-733.4]      | 11.7            | 22.6            |
|                  | 7           | Colorectal cancer          | 610.9 [534.6-677.3]      | 5.6             | 14.9            |
|                  | 8           | Diabetes mellitus          | 537.8 [456.9-596.9]      | -5.8            | 17.6            |
|                  | 9           | Breast cancer              | 507.3 [453.1-566.6]      | -6.0            | 11.4            |
|                  | 10          | Chronic kidney disease     | 480.6 [391.5-555.8]      | -4.4            | 5.7             |

| Region             | Rank (2019) | Cause                      | YLLs per 100000 [95% UI] | Change 2000 (%) | Change 2021 (%) |
|--------------------|-------------|----------------------------|--------------------------|-----------------|-----------------|
| Basilicata - South | 1           | Ischemic heart disease     | 2157.9 [1872-2361.7]     | -12.7           | 2.2             |
|                    | 2           | Stroke                     | 1414.8 [1193.4-1560.7]   | -24.7           | 1.2             |
|                    | 3           | Alzheimer and other        | 1217.2 [325.8-3037.5]    | 37.8            | -0.1            |
|                    | 4           | Hypertensive heart disease | 1102.8 [899.7-1232.8]    | 57.2            | 2.0             |
|                    | 5           | Lung cancer                | 938.3 [851.2-1028.3]     | 36.1            | 19.8            |
|                    | 6           | COPD                       | 816.4 [684.5-900.2]      | 22.2            | 17.5            |
|                    | 7           | Colorectal cancer          | 686.4 [609.9-759.2]      | 8.6             | 20.3            |
|                    | 8           | Diabetes mellitus          | 641.9 [553.4-710.6]      | 2.4             | 7.9             |
|                    | 9           | Cirrhosis and other CLDs   | 529.6 [480-570.9]        | -14.4           | 23.5            |
|                    | 10          | Chronic kidney disease     | 488.4 [396.3-549]        | -19.4           | 8.2             |
| Calabria - South   | 1           | Ischemic heart disease     | 2100.5 [1850.6-2264.5]   | -12.4           | 2.0             |
|                    | 2           | Stroke                     | 1423.1 [1208.4-1547.9]   | -22.0           | 11.1            |
|                    | 3           | Alzheimer and other        | 1049.1 [270.7-2614.3]    | 20.3            | 37.8            |
|                    | 4           | Hypertensive heart disease | 983.7 [812.2-1089.8]     | 47.7            | 5.8             |
|                    | 5           | Lung cancer                | 955.7 [876.6-1032.2]     | 53.7            | 4.7             |
|                    | 6           | Colorectal cancer          | 691.3 [619.2-754.1]      | 11.5            | 39.6            |
|                    | 7           | Diabetes mellitus          | 639.3 [558-698.5]        | 14.9            | 9.5             |
|                    | 8           | COPD                       | 633.8 [547.6-691.5]      | 16.9            | 2.7             |
|                    | 9           | Breast cancer              | 450.2 [404.4-492.8]      | -16.7           | 43.5            |
|                    | 10          | Chronic kidney disease     | 438.2 [371.7-484.9]      | -15.1           | 2.6             |
| Sicilia - Islands  | 1           | Ischemic heart disease     | 1956.6 [1707.5-2108.2]   | -21.4           | 3.7             |
|                    | 2           | Stroke                     | 1565.5 [1310.3-1724.5]   | -28.1           | 25.8            |
|                    | 3           | Alzheimer and other        | 1164 [309.8-2844.8]      | 11.2            | 39.2            |
|                    | 4           | Lung cancer                | 1094.3 [996.8-1183]      | 44.1            | 7.2             |
|                    | 5           | Hypertensive heart disease | 787 [640.1-882.5]        | 8.5             | 42.4            |
|                    | 6           | Colorectal cancer          | 693 [611.3-764.3]        | 13.1            | 17.8            |
|                    | 7           | COPD                       | 663.8 [568.3-725.8]      | 9.1             | 7.2             |
|                    | 8           | Diabetes mellitus          | 646.5 [552.7-707.1]      | 14.7            | 6.6             |
|                    | 9           | Breast cancer              | 503.3 [444.2-546.9]      | -8.5            | 32.9            |
|                    | 10          | Chronic kidney disease     | 501.2 [413-559]          | -5.5            | 4.4             |

| Region             | Rank (2019) | Cause                      | YLLs per 100000 [95% UI] | Change 2000 (%) | Change 2021 (%) |
|--------------------|-------------|----------------------------|--------------------------|-----------------|-----------------|
| Sardegna - Islands | 1           | Ischemic heart disease     | 1633.1 [1397.4-1775.1]   | -24.6           | 5.4             |
|                    | 2           | Lung cancer                | 1220.2 [1105.6-1335.5]   | -20.1           | 4.1             |
|                    | 3           | Stroke                     | 1200.6 [1001.4-1318.6]   | 5.2             | 4.9             |
|                    | 4           | Alzheimer and other        | 1138.9 [307-2732.9]      | 58.2            | 4.5             |
|                    | 5           | Colorectal cancer          | 769.5 [672.2-870.3]      | 14.9            | 51.2            |
|                    | 6           | Breast cancer              | 568.6 [499.4-636.1]      | -9.7            | 40.4            |
|                    | 7           | Pancreatic cancer          | 521.6 [467.6-571]        | -14.6           | 9.1             |
|                    | 8           | COPD                       | 520.6 [438.7-574.6]      | -4.2            | 6.7             |
|                    | 9           | Cirrhosis and other CLDs   | 492.6 [450.7-531.3]      | 7.3             | 10.3            |
|                    | 10          | Hypertensive heart disease | 487.8 [391.7-546.6]      | 7.9             | 6.4             |

Change 2000: YLL rate change (%) from 2000 to 2019; Change 2021: YLL rate change (%) from 2019 to 2021.

Abbreviations: COPD: Chronic Obstructive Pulmonary Disease; CLDs: Chronic Liver Diseases; UI: Uncertainty Interval.

Table S4. Ten leading causes of age-standardised Years of Life Lost (YLLs) in 2019 by region.

| Region                     | Rank (2019) | Cause                  | YLLs per 100000 [95% UI] | Change 2000 (%) | Change 2021 (%) |
|----------------------------|-------------|------------------------|--------------------------|-----------------|-----------------|
| Piemonte - North-West      | 1           | Ischemic heart disease | 683.8 [608.3-732.8]      | -47.4           | -3.0            |
|                            | 2           | Lung cancer            | 561 [510.6-605.8]        | -44.2           | 15.1            |
|                            | 3           | Stroke                 | 506.5 [434.2-550.3]      | -40.7           | 8.6             |
|                            | 4           | Alzheimer and other    | 349.7 [92.1-866.7]       | -58.8           | 40.2            |
|                            | 5           | Colorectal cancer      | 314.6 [280.8-351]        | -26.3           | 5.4             |
|                            | 6           | Breast cancer          | 254 [226.3-280.4]        | -36.3           | 21.2            |
|                            | 7           | Road injuries          | 244 [231.1-257.6]        | -34.7           | -0.2            |
|                            | 8           | Self-harm              | 237.7 [223.7-252.5]      | -34.3           | -5.4            |
|                            | 9           | COPD                   | 208.2 [180.3-225.6]      | -40.1           | 5.3             |
|                            | 10          | Neonatal disorders     | 207.8 [189.6-225.4]      | -37.1           | -0.7            |
| Valle d'Aosta - North-West | 1           | Ischemic heart disease | 725.7 [641.6-795.6]      | -52.0           | -2.9            |
|                            | 2           | Lung cancer            | 522.8 [458.8-595.2]      | -45.3           | 16.0            |
|                            | 3           | Stroke                 | 446.9 [373-497.2]        | -48.6           | 12.3            |
|                            | 4           | Alzheimer and other    | 346.2 [92.3-829]         | -58.4           | 27.0            |
|                            | 5           | Self-harm              | 315.6 [286.4-347.9]      | -42.4           | 4.4             |
|                            | 6           | Colorectal cancer      | 275.6 [237.5-315.6]      | -42.8           | 1.9             |
|                            | 7           | Road injuries          | 254.7 [234-279.1]        | -46.5           | 4.3             |
|                            | 8           | Breast cancer          | 243.2 [206.2-284.8]      | -43.7           | -4.4            |
|                            | 9           | COPD                   | 229.6 [194.6-255.1]      | -44.9           | -1.2            |
|                            | 10          | Pancreatic cancer      | 201.3 [178.3-223]        | -44.8           | 9.8             |

| Region                  | Rank (2019) | Cause                    | YLLs per 100000 [95% UI] | Change 2000 (%) | Change 2021 (%) |
|-------------------------|-------------|--------------------------|--------------------------|-----------------|-----------------|
| Lombardia - North-West  | 1           | Ischemic heart disease   | 650.6 [572.3-697.4]      | -54.0           | 13.2            |
|                         | 2           | Lung cancer              | 557 [508.8-600.6]        | -35.1           | 10.3            |
|                         | 3           | Stroke                   | 404.9 [342.4-443.6]      | -49.1           | 31.4            |
|                         | 4           | Alzheimer and other      | 376.8 [104.1-911.2]      | -48.1           | 1.7             |
|                         | 5           | Colorectal cancer        | 272.4 [240.8-305.4]      | -32.8           | 33.7            |
|                         | 6           | Breast cancer            | 247 [217.6-269.6]        | -36.9           | 5.3             |
|                         | 7           | Neonatal disorders       | 225.1 [203.5-250.2]      | -40.5           | 3.8             |
|                         | 8           | Pancreatic cancer        | 222.2 [200.8-238.9]      | -35.0           | -0.8            |
|                         | 9           | Road injuries            | 221.6 [210-232.9]        | -34.8           | -3.8            |
|                         | 10          | Self-harm                | 207.8 [195.8-220.3]      | -38.4           | -4.0            |
| AP Bolzano - North-East | 1           | Ischemic heart disease   | 616.3 [541.5-672.3]      | -57.5           | 85.0            |
|                         | 2           | Lung cancer              | 439 [394.7-485]          | -42.5           | 35.5            |
|                         | 3           | Stroke                   | 344.8 [293.3-381.3]      | -51.7           | 14.9            |
|                         | 4           | Alzheimer and other      | 340.7 [91.2-822]         | -45.3           | 0.1             |
|                         | 5           | Colorectal cancer        | 275.8 [240.3-313.3]      | -37.8           | 19.6            |
|                         | 6           | Self-harm                | 268.2 [247.7-289]        | -35.8           | -4.3            |
|                         | 7           | Neonatal disorders       | 243.8 [209.1-283.1]      | -38.6           | -1.4            |
|                         | 8           | Road injuries            | 225.7 [209.3-240.8]      | -37.3           | 0.7             |
|                         | 9           | Breast cancer            | 209.2 [184-235.4]        | -34.2           | -6.7            |
|                         | 10          | Pancreatic cancer        | 203.1 [182.1-221.9]      | -32.0           | -6.8            |
| AP Trento - North-East  | 1           | Ischemic heart disease   | 620 [530.3-676]          | -61.7           | 45.9            |
|                         | 2           | Lung cancer              | 467.8 [420.8-513.4]      | -38.3           | 27.9            |
|                         | 3           | Alzheimer and other      | 352.7 [92.9-857.1]       | -45.7           | 19.6            |
|                         | 4           | Stroke                   | 295 [249.7-326]          | -53.3           | 14.4            |
|                         | 5           | Colorectal cancer        | 273.1 [234.3-310.1]      | -35.9           | 4.8             |
|                         | 6           | Road injuries            | 237.5 [221.1-255.7]      | -37.4           | 5.4             |
|                         | 7           | Breast cancer            | 236.3 [204.1-265.8]      | -36.6           | -11.1           |
|                         | 8           | Self-harm                | 221.3 [203.3-241.2]      | -39.0           | -6.0            |
|                         | 9           | Congenital birth defects | 204.7 [175.4-238.7]      | -30.8           | -5.1            |
|                         | 10          | Pancreatic cancer        | 200.2 [178.9-218.8]      | -32.3           | -9.2            |

| Region                             | Rank (2019) | Cause                    | YLLs per 100000 [95% UI] | Change 2000 (%) | Change 2021 (%) |
|------------------------------------|-------------|--------------------------|--------------------------|-----------------|-----------------|
| Veneto - North East                | 1           | Ischemic heart disease   | 625.7 [550.6-670.5]      | -51.6           | 38.8            |
|                                    | 2           | Lung cancer              | 476.6 [432.2-516.4]      | -43.5           | 23.4            |
|                                    | 3           | Stroke                   | 367.4 [315-403.5]        | -56.2           | 20.6            |
|                                    | 4           | Alzheimer and other      | 364.3 [96.4-901]         | -47.5           | -2.5            |
|                                    | 5           | Colorectal cancer        | 278.1 [240.6-311.5]      | -31.6           | 24.6            |
|                                    | 6           | Road injuries            | 263 [249.9-276.6]        | -29.7           | -1.6            |
|                                    | 7           | Breast cancer            | 236 [211.8-257.9]        | -32.4           | 3.4             |
|                                    | 8           | Self-harm                | 221.5 [208-236.1]        | -33.7           | -2.4            |
|                                    | 9           | Pancreatic cancer        | 213.5 [193.3-231.9]      | -29.0           | -5.3            |
|                                    | 10          | Neonatal disorders       | 211.3 [192-230.8]        | -28.0           | -5.6            |
| Friuli-Venezia Giulia - North-East | 1           | Ischemic heart disease   | 675.9 [596.9-733.4]      | -53.7           | 95.6            |
|                                    | 2           | Lung cancer              | 508.9 [459.4-552.9]      | -38.8           | 24.6            |
|                                    | 3           | Stroke                   | 388.8 [330.8-427.2]      | -52.8           | 21.4            |
|                                    | 4           | Alzheimer and other      | 348.2 [92.2-854.9]       | -52.5           | 5.7             |
|                                    | 5           | Colorectal cancer        | 304 [267.2-343]          | -34.5           | 8.2             |
|                                    | 6           | Road injuries            | 272.5 [256.9-289.9]      | -35.5           | 3.5             |
|                                    | 7           | Breast cancer            | 263.4 [231.3-293.8]      | -35.7           | -6.5            |
|                                    | 8           | Self-harm                | 253.6 [236-272.6]        | -29.8           | -5.7            |
|                                    | 9           | Pancreatic cancer        | 231.7 [209.2-252.2]      | -32.5           | -1.4            |
|                                    | 10          | Neonatal disorders       | 187.4 [162.8-214]        | -41.0           | 15.3            |
| Liguria - North-West               | 1           | Ischemic heart disease   | 669.9 [592.6-720.7]      | -53.7           | -2.1            |
|                                    | 2           | Lung cancer              | 563.6 [513.5-614.6]      | -35.8           | 12.6            |
|                                    | 3           | Stroke                   | 462.2 [398.8-506.5]      | -44.7           | 15.2            |
|                                    | 4           | Alzheimer and other      | 360.5 [94.6-879.3]       | -43.3           | 22.3            |
|                                    | 5           | Colorectal cancer        | 320.8 [285.5-355.8]      | -32.3           | 8.8             |
|                                    | 6           | Breast cancer            | 258.1 [226.4-288]        | -45.0           | 17.5            |
|                                    | 7           | Neonatal disorders       | 242.3 [202.5-284.2]      | -42.2           | 1.0             |
|                                    | 8           | Pancreatic cancer        | 213.1 [193-233.2]        | -42.6           | 9.7             |
|                                    | 9           | Congenital birth defects | 208 [180.1-239.5]        | -42.9           | -2.9            |
|                                    | 10          | Road injuries            | 202.7 [189.6-216.7]      | -41.5           | -5.3            |

| Region                      | Rank (2019) | Cause                  | YLLs per 100000 [95% UI] | Change 2000 (%) | Change 2021 (%) |
|-----------------------------|-------------|------------------------|--------------------------|-----------------|-----------------|
| Emilia-Romagna - North-East | 1           | Ischemic heart disease | 605.6 [524.3-658]        | -57.3           | 52.5            |
|                             | 2           | Lung cancer            | 534.5 [482.5-581]        | -42.8           | 7.0             |
|                             | 3           | Alzheimer and other    | 392.6 [108.2-955.9]      | -51.2           | 25.7            |
|                             | 4           | Stroke                 | 368.3 [313.4-405.8]      | -48.6           | 3.0             |
|                             | 5           | Road injuries          | 272 [257.1-287]          | -34.4           | 28.6            |
|                             | 6           | Colorectal cancer      | 268.2 [233.2-301.7]      | -34.9           | -3.9            |
|                             | 7           | Self-harm              | 227.1 [211.6-244.3]      | -41.7           | 9.4             |
|                             | 8           | Breast cancer          | 224.2 [198.9-244.3]      | -35.3           | -8.1            |
|                             | 9           | Pancreatic cancer      | 221.3 [199.8-238]        | -34.3           | -7.0            |
|                             | 10          | Neonatal disorders     | 216.5 [195.8-236.4]      | -34.1           | -5.1            |
| Toscana - Centre            | 1           | Ischemic heart disease | 627.1 [561.6-669.9]      | -52.7           | 10.7            |
|                             | 2           | Lung cancer            | 538.7 [495.8-585.4]      | -41.7           | 12.0            |
|                             | 3           | Stroke                 | 474.9 [408.2-515.4]      | -37.1           | 8.1             |
|                             | 4           | Alzheimer and other    | 321.7 [82.8-809.2]       | -52.4           | 41.7            |
|                             | 5           | Colorectal cancer      | 279.6 [246.7-314.4]      | -32.3           | 11.7            |
|                             | 6           | Breast cancer          | 253.8 [228.3-277.5]      | -33.0           | 5.0             |
|                             | 7           | Road injuries          | 230.3 [218.4-242.2]      | -34.0           | 3.2             |
|                             | 8           | Self-harm              | 194.9 [182.7-209.2]      | -42.2           | 11.5            |
|                             | 9           | Pancreatic cancer      | 193.6 [177-207.6]        | -40.9           | -4.2            |
|                             | 10          | COPD                   | 182 [161.1-197.1]        | -40.2           | 0.6             |
| Umbria - Centre             | 1           | Ischemic heart disease | 715 [619.2-775.5]        | -53.3           | -5.7            |
|                             | 2           | Lung cancer            | 476.3 [429.2-524.8]      | -47.1           | 30.6            |
|                             | 3           | Stroke                 | 427.2 [360.2-469.6]      | -40.0           | 3.5             |
|                             | 4           | Alzheimer and other    | 354.8 [93.8-874.2]       | -42.0           | 13.3            |
|                             | 5           | Colorectal cancer      | 284.6 [250.6-317.3]      | -30.8           | 17.5            |
|                             | 6           | Road injuries          | 232.1 [216.8-247.8]      | -41.5           | 13.7            |
|                             | 7           | Breast cancer          | 226.3 [198.5-249.9]      | -36.6           | 12.3            |
|                             | 8           | Self-harm              | 219.7 [203.9-236.5]      | -38.1           | -2.7            |
|                             | 9           | Neonatal disorders     | 191.9 [160.5-226.6]      | -42.5           | 6.4             |
|                             | 10          | Pancreatic cancer      | 190.9 [171.1-208.1]      | -38.8           | -4.0            |

| Region          | Rank (2019) | Cause                      | YLLs per 100000 [95% UI] | Change 2000 (%) | Change 2021 (%) |
|-----------------|-------------|----------------------------|--------------------------|-----------------|-----------------|
| Marche - Centre | 1           | Ischemic heart disease     | 684.2 [593.9-749.7]      | -46.9           | -2.4            |
|                 | 2           | Lung cancer                | 442.1 [395.6-486.6]      | -47.2           | 50.2            |
|                 | 3           | Stroke                     | 383.9 [325.8-424.9]      | -49.3           | 9.9             |
|                 | 4           | Alzheimer and other        | 357.3 [94.1-890.2]       | -46.1           | 5.2             |
|                 | 5           | Colorectal cancer          | 291.9 [259.6-324.1]      | -26.6           | 19.4            |
|                 | 6           | Road injuries              | 234 [218.4-249.6]        | -37.6           | 19.4            |
|                 | 7           | Breast cancer              | 220.2 [194.2-244.4]      | -39.2           | -3.8            |
|                 | 8           | Self-harm                  | 205.5 [190.9-221.6]      | -42.2           | 1.6             |
|                 | 9           | Pancreatic cancer          | 200.3 [180.1-218.4]      | -43.6           | -3.7            |
|                 | 10          | Congenital birth defects   | 179.1 [155.2-209.5]      | -42.7           | 1.7             |
| Lazio - Centre  | 1           | Ischemic heart disease     | 799.5 [713.4-863.2]      | -49.7           | -2.0            |
|                 | 2           | Lung cancer                | 620.4 [565.9-668.9]      | -28.0           | 24.0            |
|                 | 3           | Stroke                     | 427.3 [375.4-462.2]      | -50.0           | 40.6            |
|                 | 4           | Alzheimer and other        | 347.5 [92.3-871.1]       | -51.0           | 19.4            |
|                 | 5           | Colorectal cancer          | 307.5 [269-350.5]        | -37.8           | 7.3             |
|                 | 6           | Road injuries              | 261.1 [247.3-273.7]      | -39.6           | 14.1            |
|                 | 7           | Neonatal disorders         | 257 [239.3-275.7]        | -34.3           | -3.9            |
|                 | 8           | Breast cancer              | 255.4 [230.7-276.9]      | -29.6           | -6.6            |
|                 | 9           | Hypertensive heart disease | 205.6 [173.5-226.2]      | -42.4           | 7.5             |
|                 | 10          | COPD                       | 199.3 [174.3-217.1]      | -38.2           | -0.8            |
| Abruzzo - South | 1           | Ischemic heart disease     | 846.3 [750.9-914.4]      | -33.8           | -3.2            |
|                 | 2           | Stroke                     | 447.5 [388-491.8]        | -49.1           | 59.7            |
|                 | 3           | Lung cancer                | 445.9 [405-485.7]        | -38.0           | -3.2            |
|                 | 4           | Alzheimer and other        | 347.5 [91.2-867.7]       | -42.2           | 23.0            |
|                 | 5           | Colorectal cancer          | 296.1 [265.8-324.7]      | -38.6           | 13.5            |
|                 | 6           | Neonatal disorders         | 274.5 [230.3-317.6]      | -33.6           | 3.1             |
|                 | 7           | Road injuries              | 272.6 [258.5-286.8]      | -29.4           | -6.9            |
|                 | 8           | Congenital birth defects   | 224.7 [193.3-261.2]      | -39.2           | 4.0             |
|                 | 9           | Breast cancer              | 222.3 [199.1-244.9]      | -37.7           | -7.4            |
|                 | 10          | Hypertensive heart disease | 213.2 [174.6-235.4]      | -26.5           | -3.5            |

| Region           | Rank (2019) | Cause                      | YLLs per 100000 [95% UI] | Change 2000 (%) | Change 2021 (%) |
|------------------|-------------|----------------------------|--------------------------|-----------------|-----------------|
| Molise - South   | 1           | Ischemic heart disease     | 963.3 [860.8-1046.5]     | -39.7           | -7.1            |
|                  | 2           | Stroke                     | 532 [466.9-583.3]        | -47.6           | 66.1            |
|                  | 3           | Lung cancer                | 479.5 [429.5-526.4]      | -34.0           | 2.9             |
|                  | 4           | Alzheimer and other        | 350.7 [90.8-889.1]       | -32.8           | 26.1            |
|                  | 5           | Colorectal cancer          | 325.8 [287.1-364.2]      | -27.6           | 1.9             |
|                  | 6           | Road injuries              | 279.9 [259-302.1]        | -34.7           | 6.8             |
|                  | 7           | Cirrhosis and other CLDs   | 271.4 [248.6-296.7]      | -35.7           | -10.0           |
|                  | 8           | Hypertensive heart disease | 246.5 [209.6-272.6]      | -37.8           | -1.8            |
|                  | 9           | Diabetes mellitus          | 237.6 [214.2-260]        | -33.2           | -3.0            |
|                  | 10          | Breast cancer              | 234.9 [206.1-265.3]      | -24.8           | -5.2            |
| Campania - South | 1           | Ischemic heart disease     | 1043.6 [941.3-1114.6]    | -44.6           | -0.7            |
|                  | 2           | Lung cancer                | 676.3 [622.5-727.8]      | -49.1           | 44.7            |
|                  | 3           | Stroke                     | 628 [556.2-679.8]        | -29.7           | 6.8             |
|                  | 4           | Alzheimer and other        | 357.6 [92.9-891.9]       | -45.7           | 73.1            |
|                  | 5           | Colorectal cancer          | 333.1 [291.3-371.8]      | -41.3           | 4.9             |
|                  | 6           | Neonatal disorders         | 319.7 [297.3-341.2]      | -39.1           | 3.7             |
|                  | 7           | Diabetes mellitus          | 306.7 [277.7-329]        | -36.9           | 0.3             |
|                  | 8           | COPD                       | 301.6 [266-325.4]        | -24.2           | 1.3             |
|                  | 9           | Breast cancer              | 288.2 [260.7-315.1]      | -27.1           | 4.0             |
|                  | 10          | Hypertensive heart disease | 283.3 [238.2-310.6]      | -25.6           | 0.2             |
| Puglia - South   | 1           | Ischemic heart disease     | 711.4 [624.6-765.6]      | -45.6           | 46.5            |
|                  | 2           | Lung cancer                | 475.3 [436.1-513.2]      | -43.9           | 49.3            |
|                  | 3           | Stroke                     | 392.7 [338-427.9]        | -43.8           | 19.9            |
|                  | 4           | Alzheimer and other        | 359.4 [96.2-880.5]       | -43.0           | 8.6             |
|                  | 5           | Colorectal cancer          | 286.5 [254.3-317.3]      | -48.1           | 23.3            |
|                  | 6           | Breast cancer              | 276.6 [250.7-304.8]      | -39.7           | 2.7             |
|                  | 7           | Hypertensive heart disease | 275.8 [226.2-306.1]      | -35.4           | -1.1            |
|                  | 8           | COPD                       | 247.3 [212.9-269.7]      | -32.9           | 7.3             |
|                  | 9           | Neonatal disorders         | 244.9 [224.8-265.5]      | -32.1           | 1.7             |
|                  | 10          | Road injuries              | 236.2 [222.2-249.6]      | -32.0           | 4.6             |

| Region             | Rank (2019) | Cause                      | YLLs per 100000 [95% UI] | Change 2000 (%) | Change 2021 (%) |
|--------------------|-------------|----------------------------|--------------------------|-----------------|-----------------|
| Basilicata - South | 1           | Ischemic heart disease     | 819.3 [736-887.7]        | -42.2           | -1.7            |
|                    | 2           | Stroke                     | 502.4 [441.4-548.5]      | -52.1           | 1.8             |
|                    | 3           | Lung cancer                | 443 [405.1-484.6]        | -35.6           | 9.1             |
|                    | 4           | Alzheimer and other        | 354.4 [91.3-897]         | -34.2           | 23.8            |
|                    | 5           | Hypertensive heart disease | 340.4 [287-376.8]        | -34.9           | -1.3            |
|                    | 6           | Neonatal disorders         | 317.1 [268.7-368.4]      | -30.9           | 3.6             |
|                    | 7           | Colorectal cancer          | 309.9 [279.4-340.9]      | -28.6           | -2.2            |
|                    | 8           | Road injuries              | 285.8 [268.1-305.9]      | -21.1           | 2.4             |
|                    | 9           | Cirrhosis and other CLDs   | 269.3 [247.4-291.5]      | -23.4           | -3.1            |
|                    | 10          | COPD                       | 268.5 [231.9-293.8]      | -22.0           | -3.1            |
| Calabria - South   | 1           | Ischemic heart disease     | 882.2 [799.9-944.4]      | -39.7           | -1.9            |
|                    | 2           | Stroke                     | 561.3 [495.2-609.1]      | -48.2           | 35.7            |
|                    | 3           | Lung cancer                | 476.9 [438.8-515]        | -26.2           | 15.1            |
|                    | 4           | Neonatal disorders         | 441.4 [402.9-480.5]      | -22.0           | 5.4             |
|                    | 5           | Alzheimer and other        | 348.3 [88.9-871]         | -33.8           | 28.3            |
|                    | 6           | Hypertensive heart disease | 340.2 [287.8-373.2]      | -25.9           | -2.8            |
|                    | 7           | Colorectal cancer          | 331.3 [301.7-358.7]      | -25.8           | -0.2            |
|                    | 8           | Diabetes mellitus          | 270.3 [241.4-294.1]      | -27.1           | 20.0            |
|                    | 9           | Congenital birth defects   | 266.1 [242.7-294.8]      | -24.8           | 0.0             |
|                    | 10          | Road injuries              | 263.2 [248.3-277.8]      | -24.1           | -0.8            |
| Sicilia - Islands  | 1           | Ischemic heart disease     | 860.7 [772.7-917.8]      | -43.7           | 10.9            |
|                    | 2           | Stroke                     | 642.1 [555.1-698.3]      | -50.8           | 33.4            |
|                    | 3           | Lung cancer                | 549 [503.7-590.1]        | -21.1           | 15.8            |
|                    | 4           | Alzheimer and other        | 413.3 [108.8-1006.8]     | -39.0           | 31.5            |
|                    | 5           | Neonatal disorders         | 387.4 [360.2-414.3]      | -29.7           | 2.8             |
|                    | 6           | Colorectal cancer          | 334.3 [299.4-368.2]      | -34.2           | 17.2            |
|                    | 7           | Hypertensive heart disease | 290.7 [242.3-323.2]      | -35.8           | 14.0            |
|                    | 8           | Breast cancer              | 282 [255.7-304.7]        | -33.1           | 1.6             |
|                    | 9           | Diabetes mellitus          | 277.1 [243-300.7]        | -33.5           | 0.1             |
|                    | 10          | COPD                       | 262.1 [229.8-284.6]      | -32.2           | 5.3             |

| Region             | Rank (2019) | Cause                    | YLLs per 100000 [95% UI] | Change 2000 (%) | Change 2021 (%) |
|--------------------|-------------|--------------------------|--------------------------|-----------------|-----------------|
| Sardegna - Islands | 1           | Ischemic heart disease   | 642.4 [569.8-694.4]      | -51.9           | -0.2            |
|                    | 2           | Lung cancer              | 545 [497.7-592]          | -40.5           | -1.1            |
|                    | 3           | Stroke                   | 436.4 [377.2-476.1]      | -40.6           | 18.2            |
|                    | 4           | Alzheimer and other      | 351.8 [93.8-839.9]       | -48.8           | 23.4            |
|                    | 5           | Colorectal cancer        | 333.1 [293.2-374.5]      | -27.8           | 1.1             |
|                    | 6           | Self-harm                | 295.8 [276.6-317.2]      | -24.3           | 11.5            |
|                    | 7           | Road injuries            | 290.1 [274.5-306.2]      | -25.4           | -5.4            |
|                    | 8           | Breast cancer            | 284 [254.2-316.2]        | -26.9           | -4.6            |
|                    | 9           | Cirrhosis and other CLDs | 248.1 [228.4-266.9]      | -34.4           | 6.5             |
|                    | 10          | Pancreatic cancer        | 231 [210.4-251]          | -37.9           | 5.3             |

Change 2000: YLL rate change (%) from 2000 to 2019; Change 2021: YLL rate change (%) from 2019 to 2021.

Abbreviations: COPD: Chronic Obstructive Pulmonary Disease; CLDs: Chronic Liver Diseases; UI: Uncertainty Interval.

Figure S16. Trends of all-age Disability-Adjusted Life-Years (DALYs) by region in Italy between 2000 and 2021 for females (a) and males (b).

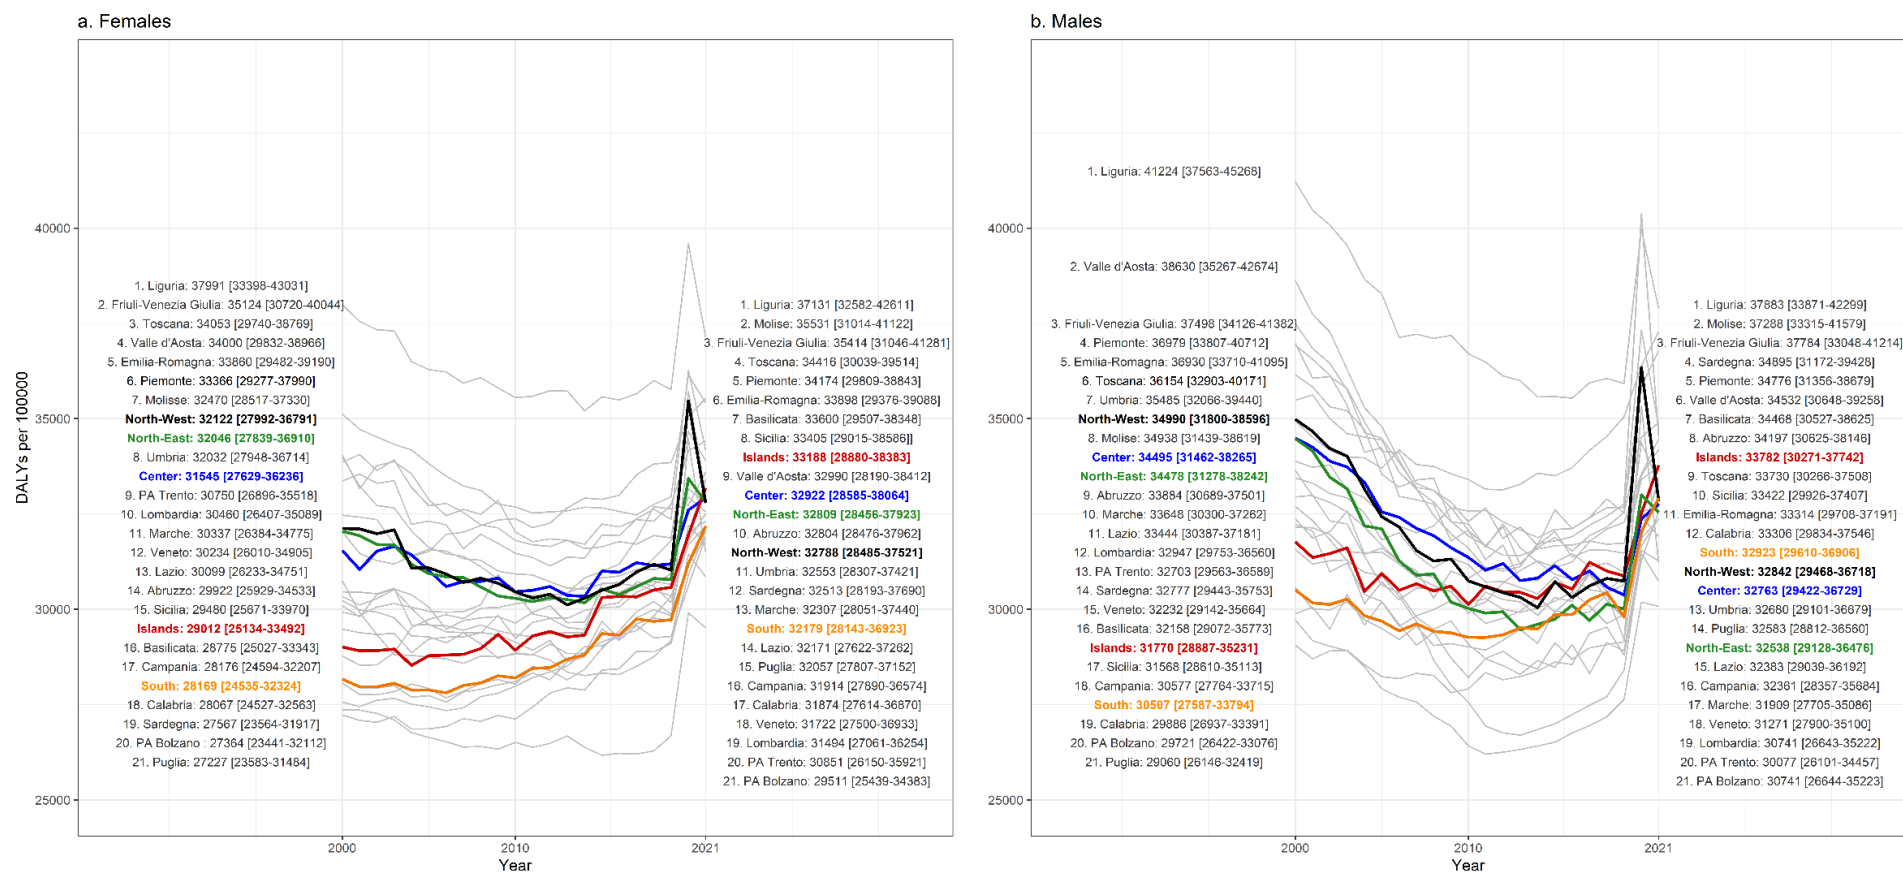

Figure S17. Ten leading causes of all-age Disability-Adjusted Life-Years (DALYs) in 2019 in Italy and the five macro-regions. Rate are expressed per 100,000 people.

| Italy     |                        |                        |                          |                          | North-West |                          |                        |                          |                          |
|-----------|------------------------|------------------------|--------------------------|--------------------------|------------|--------------------------|------------------------|--------------------------|--------------------------|
| Rank 2019 | Cause                  | DALY rate (95% UI)     | Change from 2000 to 2019 | Change from 2019 to 2021 | Rank 2019  | Cause                    | DALY rate (95% UI)     | Change from 2000 to 2019 | Change from 2019 to 2021 |
| 1         | Ischemic heart disease | 1975.7 (1717.0-2118.7) | -29.0%                   | 1.1%                     | 1          | Ischemic heart disease   | 1888.8 (1626.3-2043.1) | -33.8%                   | -0.8%                    |
| 2         | Alzheimer and other    | 1665.4 (789.0-3382.9)  | 58.9%                    | 1.2%                     | 2          | Alzheimer and other      | 1798.8 (844.9-3613.8)  | 57.0%                    | 0.6%                     |
| 3         | Low back pain          | 1556.5 (1098.5-2080.2) | 6.6%                     | 2.3%                     | 3          | Low back pain            | 1952.4 (1128.6-2114.0) | 4.3%                     | 1.9%                     |
| 4         | Stroke                 | 1442.7 (1235.2-1574.2) | -24.8%                   | 0.9%                     | 4          | Stroke                   | 1512.4 (1276.7-1669.5) | -23.0%                   | -0.6%                    |
| 5         | Falls                  | 1190.3 (911.2-1525.1)  | 1.1%                     | 1.2%                     | 5          | Lung cancer              | 1278.2 (1157.2-1371.3) | -20.5%                   | -0.9%                    |
| 6         | Lung cancer            | 1186.7 (1089.7-1245.0) | -14.1%                   | -0.4%                    | 6          | Falls                    | 1264.0 (957.5-1626.6)  | -4.1%                    | 0.6%                     |
| 7         | Diabetes mellitus      | 1070.5 (883.6-1320.4)  | 13.74%                   | 5.2%                     | 7          | Headache disorders       | 864.2 (175.4-1829.8)   | -6.0%                    | -4.1%                    |
| 8         | Headache disorders     | 858.0 (173.7-1808.2)   | -4.6%                    | -4.8%                    | 8          | Diabetes mellitus        | 807.0 (662.1-997.2)    | 2.3%                     | 3.4%                     |
| 9         | Depressive disorders   | 795.3 (546.9-1092.3)   | -7.1%                    | 17.3%                    | 9          | COPD                     | 798.2 (695.2-972.2)    | 17.5%                    | 0.8%                     |
| 10        | COPD                   | 792.1 (695.0-864.4)    | 15.8%                    | 1.6%                     | 10         | Age-related hearing loss | 734.7 (523.8-1006.4)   | 24.9%                    | 1.9%                     |

  

| North-East |                          |                        |                          |                          | Center    |                        |                        |                          |                          |
|------------|--------------------------|------------------------|--------------------------|--------------------------|-----------|------------------------|------------------------|--------------------------|--------------------------|
| Rank 2019  | Cause                    | DALY rate (95% UI)     | Change from 2000 to 2019 | Change from 2019 to 2021 | Rank 2019 | Cause                  | DALY rate (95% UI)     | Change from 2000 to 2019 | Change from 2019 to 2021 |
| 1          | Ischemic heart disease   | 1819.9 (1557.0-1978.9) | -38.7%                   | -1.2%                    | 1         | Ischemic heart disease | 2065.3 (1798.9-2227.9) | -32.1%                   | 1.3%                     |
| 2          | Alzheimer and other      | 1817.5 (875.2-3690.9)  | 45.4%                    | 0.4%                     | 2         | Alzheimer and other    | 1654.2 (784.2-3379.7)  | 54.5%                    | 1.1%                     |
| 3          | Low back pain            | 1584.9 (1118.6-2110.1) | 3.5%                     | 2.1%                     | 3         | Low back pain          | 1567.8 (1109.5-2111.1) | 4.5%                     | 2.7%                     |
| 4          | Stroke                   | 1266.7 (1062.8-1392.0) | -24.6%                   | -0.8%                    | 4         | Stroke                 | 1470.8 (1261.3-1605.4) | -27.7%                   | 0.7%                     |
| 5          | Falls                    | 1248.7 (951.3-1607.9)  | -1.6%                    | 0.6%                     | 5         | Lung cancer            | 1250.2 (1140.8-1333.3) | -14.0%                   | -0.9%                    |
| 6          | Lung cancer              | 1121.5 (1010.1-1196.5) | -26.4%                   | -4.0%                    | 6         | Falls                  | 1235.8 (947.8-1580.9)  | -0.9%                    | 1.3%                     |
| 7          | Diabetes mellitus        | 982.8 (793.8-1221.2)   | 22.3%                    | 5.2%                     | 7         | Diabetes mellitus      | 1010.0 (827.3-1241.5)  | 8.7%                     | 4.7%                     |
| 8          | Depressive disorders     | 964.5 (657.2-1324.4)   | -4.7%                    | 16.5%                    | 8         | Headache disorders     | 854.2 (174.4-1796.4)   | -4.7%                    | 5.2%                     |
| 9          | Headache disorders       | 866.8 (172.6-1837.2)   | -5.1%                    | -4.6%                    | 9         | Depressive disorders   | 821.9 (563.4-1133.9)   | -10.5%                   | 16.9%                    |
| 10         | Age-related hearing loss | 717.8 (511.2-979.0)    | 19.8%                    | 2.0%                     | 10        | COPD                   | 787.2 (690.6-856.9)    | 16.5%                    | 1.1%                     |

  

| South     |                            |                        |                          |                          | Islands   |                        |                        |                          |                          |
|-----------|----------------------------|------------------------|--------------------------|--------------------------|-----------|------------------------|------------------------|--------------------------|--------------------------|
| Rank 2019 | Cause                      | DALY rate (95% UI)     | Change from 2000 to 2019 | Change from 2019 to 2021 | Rank 2019 | Cause                  | DALY rate (95% UI)     | Change from 2000 to 2019 | Change from 2019 to 2021 |
| 1         | Ischemic heart disease     | 2138.3 (1877.1-2289.3) | -14.5%                   | 3.2%                     | 1         | Ischemic heart disease | 1959.9 (1717.3-2106.5) | -21.3%                   | 4.0%                     |
| 2         | Low back pain              | 1501.3 (1055.6-2019.5) | 11.5%                    | 2.5%                     | 2         | Stroke                 | 1628.9 (1402.3-1774.4) | 24.5%                    | 3.8%                     |
| 3         | Alzheimer and other        | 1410.6 (664.2-2923.9)  | 73.9%                    | 2.7%                     | 3         | Alzheimer and other    | 1628.4 (771.9-3306.2)  | 68.4%                    | 1.9%                     |
| 4         | Stroke                     | 1398.2 (1222.0-1515.1) | 24.3%                    | 2.8%                     | 4         | Diabetes mellitus      | 1609.9 (1299.2-1981.8) | 23.6%                    | 6.5%                     |
| 5         | Diabetes mellitus          | 1242.4 (1045.7-1506.9) | 18.3%                    | 6.2%                     | 5         | Low back pain          | 1515.2 (1067.8-2034.9) | 10.9%                    | 2.5%                     |
| 6         | Falls                      | 1127.8 (863.2-1444.9)  | 12.7%                    | 1.8%                     | 6         | Lung cancer            | 1139.8 (1040.7-1226.8) | 5.4%                     | 2.6%                     |
| 7         | Lung cancer                | 1104.7 (1026.3-1169.0) | -0.6%                    | 2.4%                     | 7         | Falls                  | 985.7 (753.5-1210.6)   | -1.3%                    | 2.1%                     |
| 8         | Headache disorders         | 865.4 (171.1-1826.3)   | -3.2%                    | -5.2%                    | 8         | COPD                   | 819.2 (715.4-894.9)    | 21.4%                    | 3.7%                     |
| 9         | COPD                       | 855.7 (753.5-927.6)    | 19.8%                    | 3.1%                     | 9         | Headache disorders     | 819.0 (174.1-1715.1)   | -3.7%                    | -5.1%                    |
| 10        | Hypertensive heart disease | 808.7 (667.3-883.6)    | 53.0%                    | 2.5%                     | 10        | Colorectal cancer      | 761.9 (674.2-841.1)    | 18.8%                    | 2.9%                     |

NCDs CMNNDs Injuries

Change 2000: DALY rate change (%) from 2000 to 2019; Change 2021: DALY rate change (%) from 2019 to 2021.

Figure S18. Leading causes of all-age Disability-Adjusted Life-Years (DALYs) in Italy in 2000 and 2019 – Both sexes.

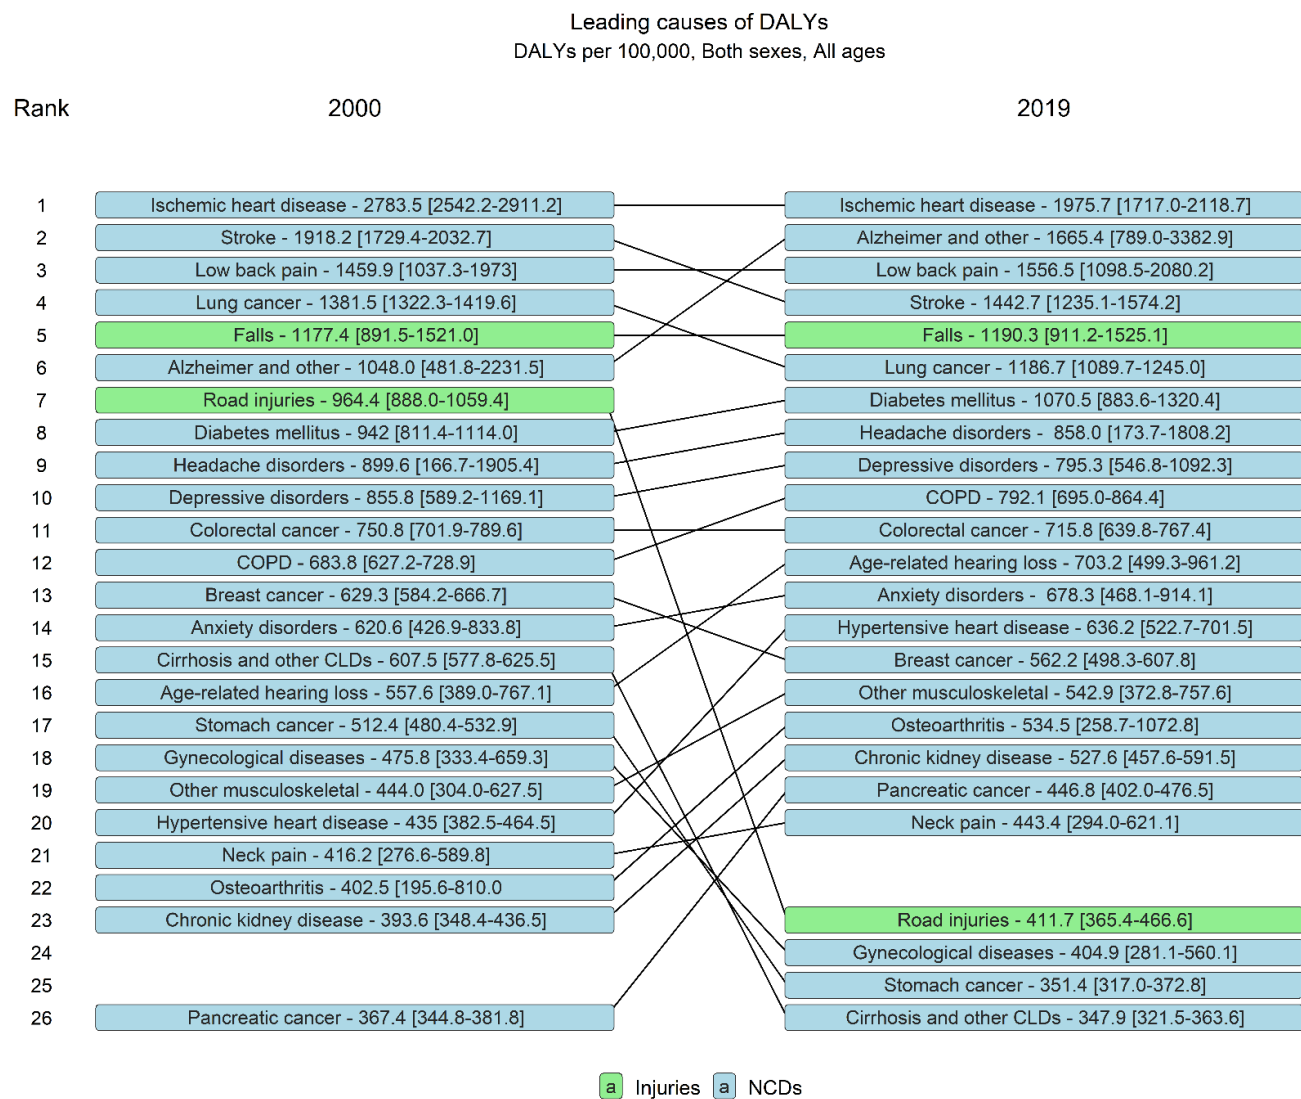

*Abbreviations: COPD: Chronic Obstructive Pulmonary Disease; CLDs: Chronic Liver Diseases; NCDs: Non-Communicable Diseases.*

Figure S19a. Leading causes of all-age Disability-Adjusted Life-Years in Italy in 2000 and 2019 - Males.

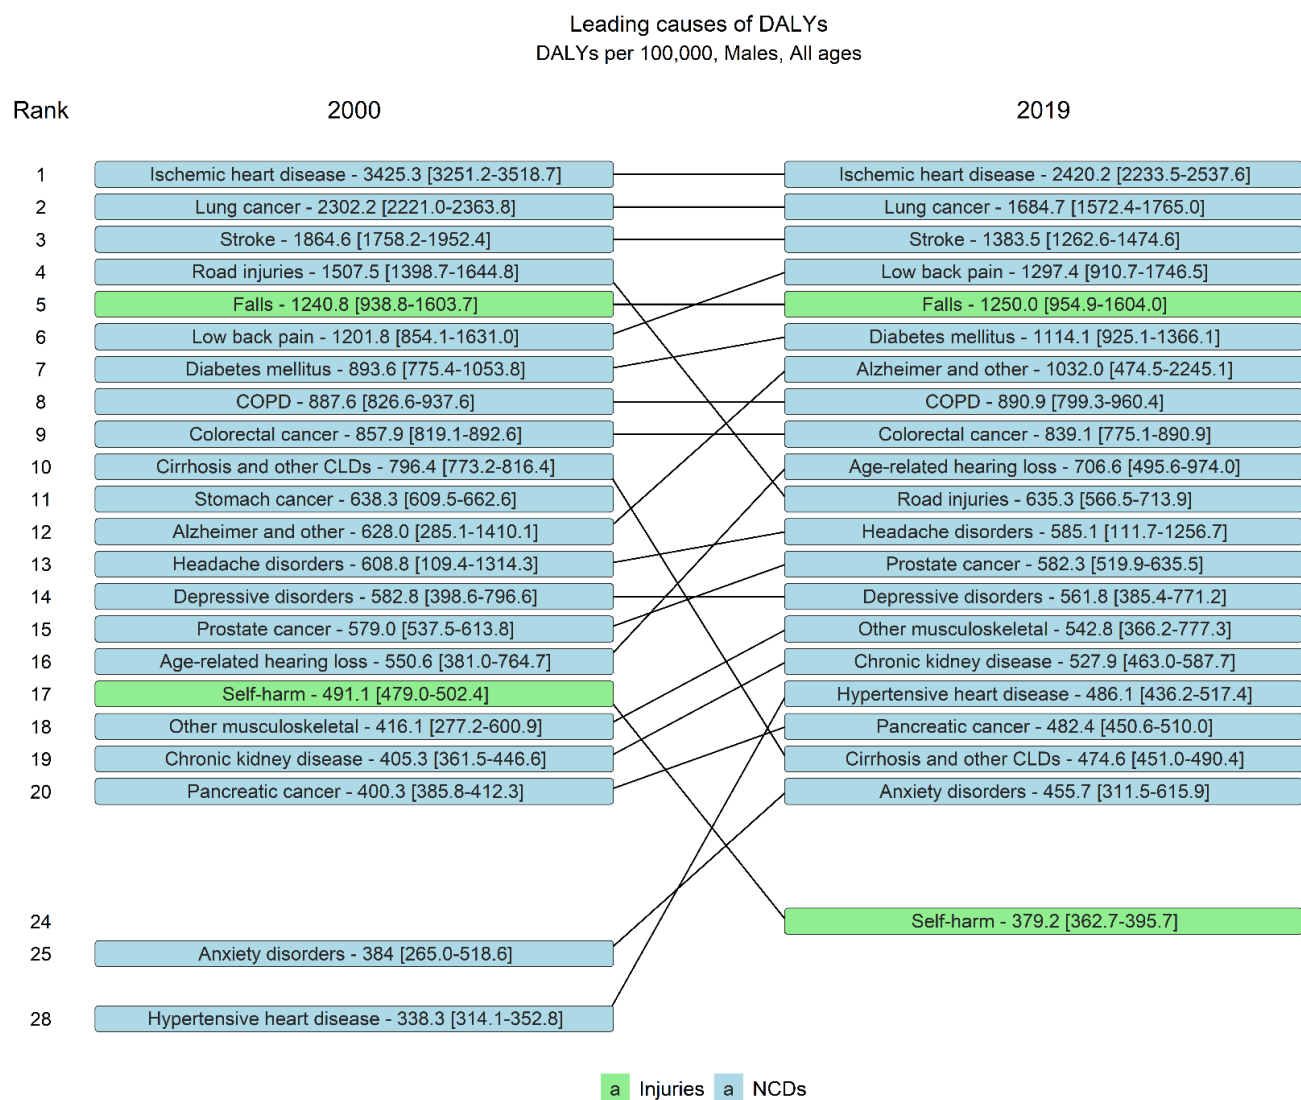

Abbreviations: COPD: Chronic Obstructive Pulmonary Disease; CLDs: Chronic Liver Diseases; NCDs: Non-Communicable Diseases.

Figure S19b. Leading causes of all-age Disability-Adjusted Life-Years in Italy in 2000 and 2019 - Females.

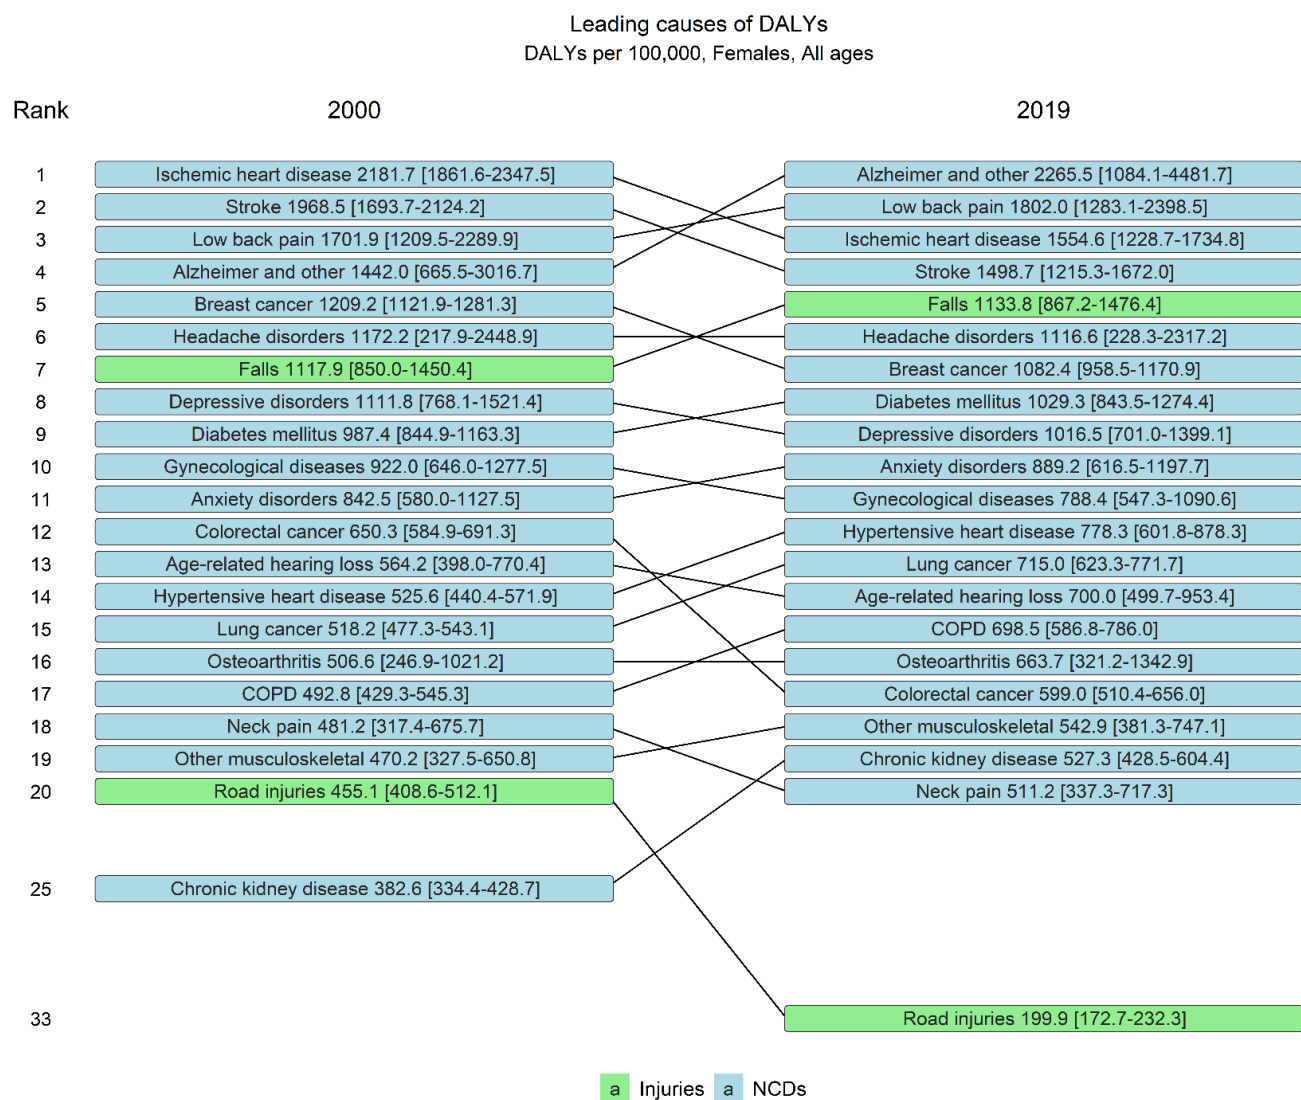

Abbreviations: COPD: Chronic Obstructive Pulmonary Disease; NCDs: Non-Communicable Diseases.

Figure S20. Trends of age-standardised Disability-Adjusted Life-Years (DALYs) by region in Italy between 2000 and 2021 for females (a) and males (b).

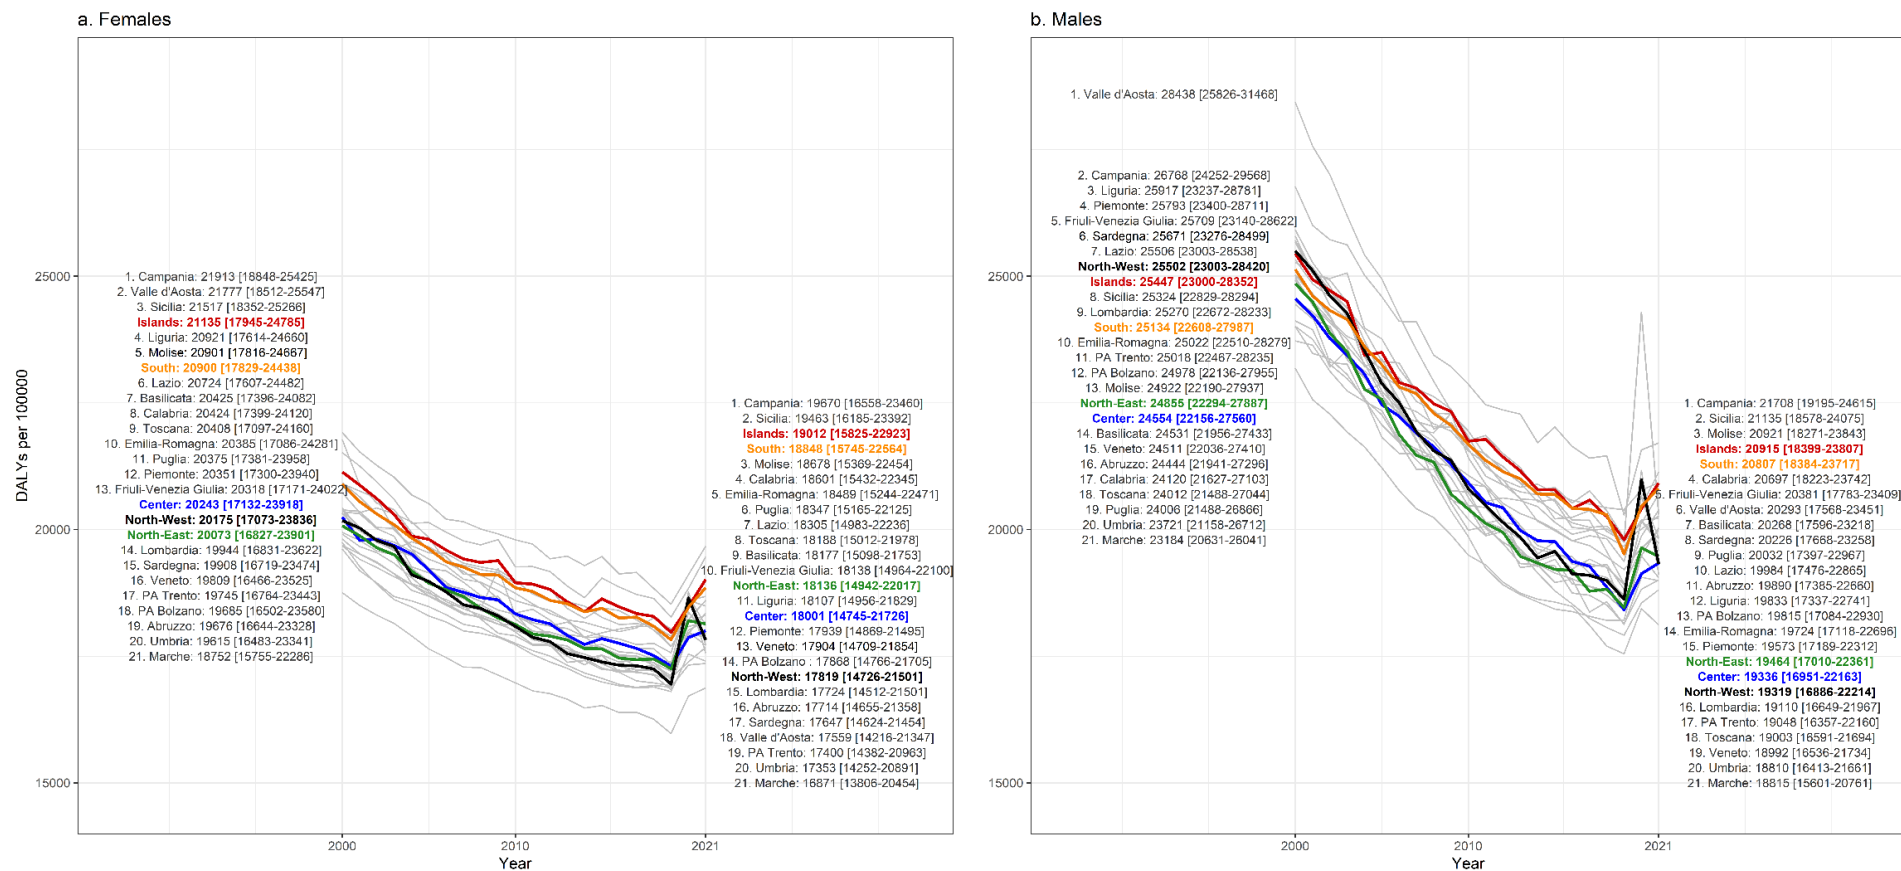

Figure S21. Leading causes of age-standardised Disability-Adjusted Life-Years (DALYs) in Italy in 2000 and 2019 – Both sexes.

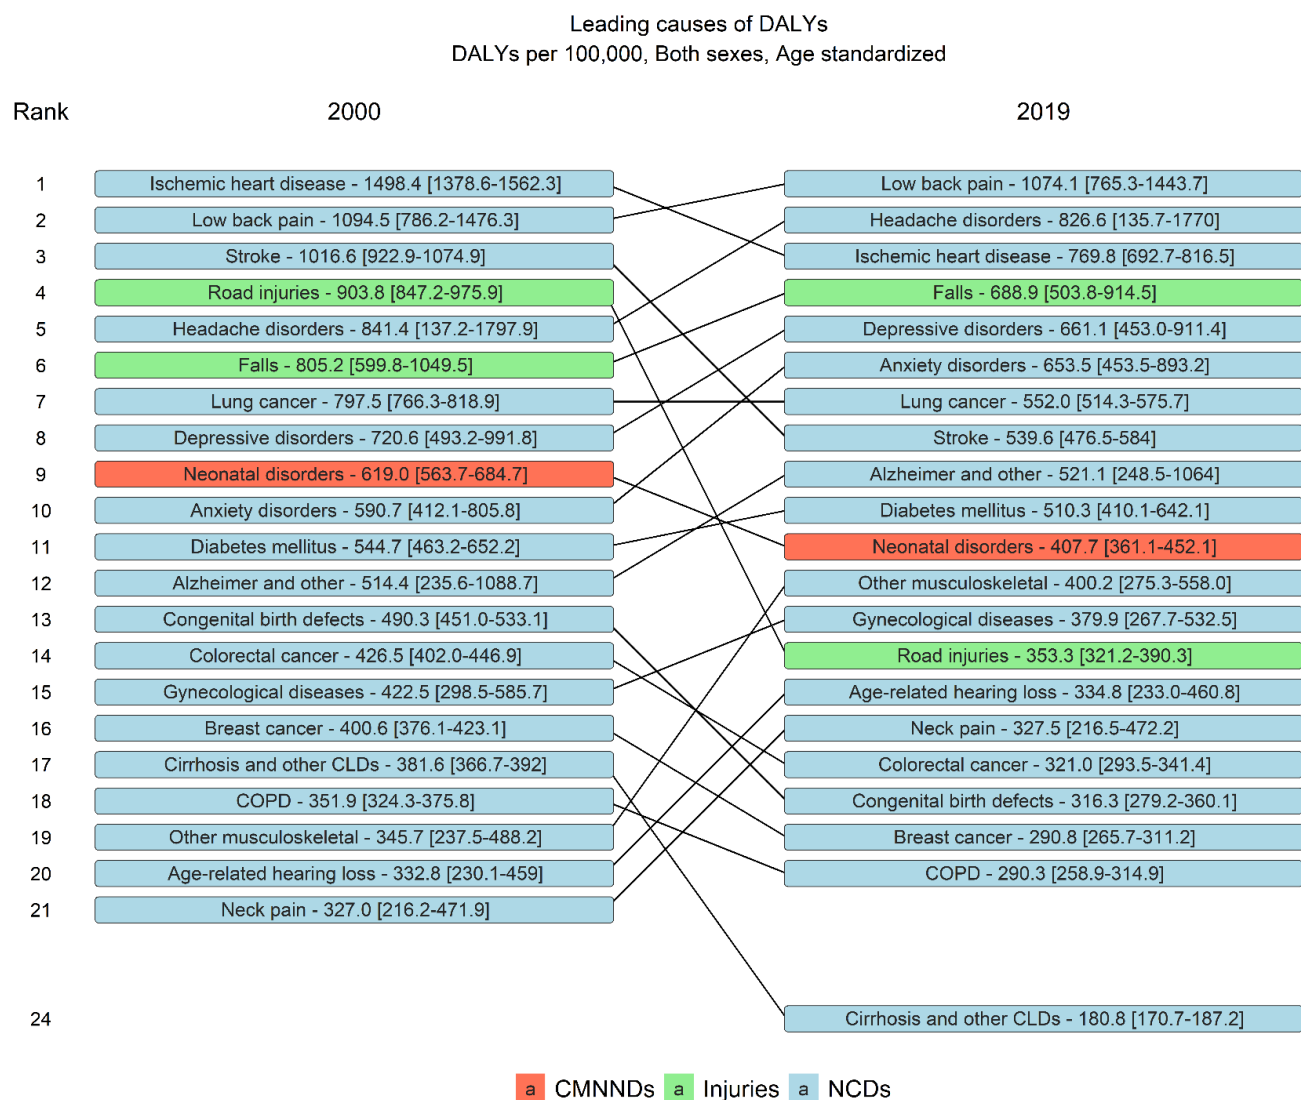

Abbreviations: CLDs: Chronic Liver Diseases; COPD: Chronic Obstructive Pulmonary Disease; CMNNDs: Communicable, Maternal, Neonatal and Nutritional Diseases; NCDs: Non-Communicable Diseases.

Figure S22a. Leading causes of age-standardised Disability-Adjusted Life-Years (DALYs) in Italy in 2000 and 2019 –Males.

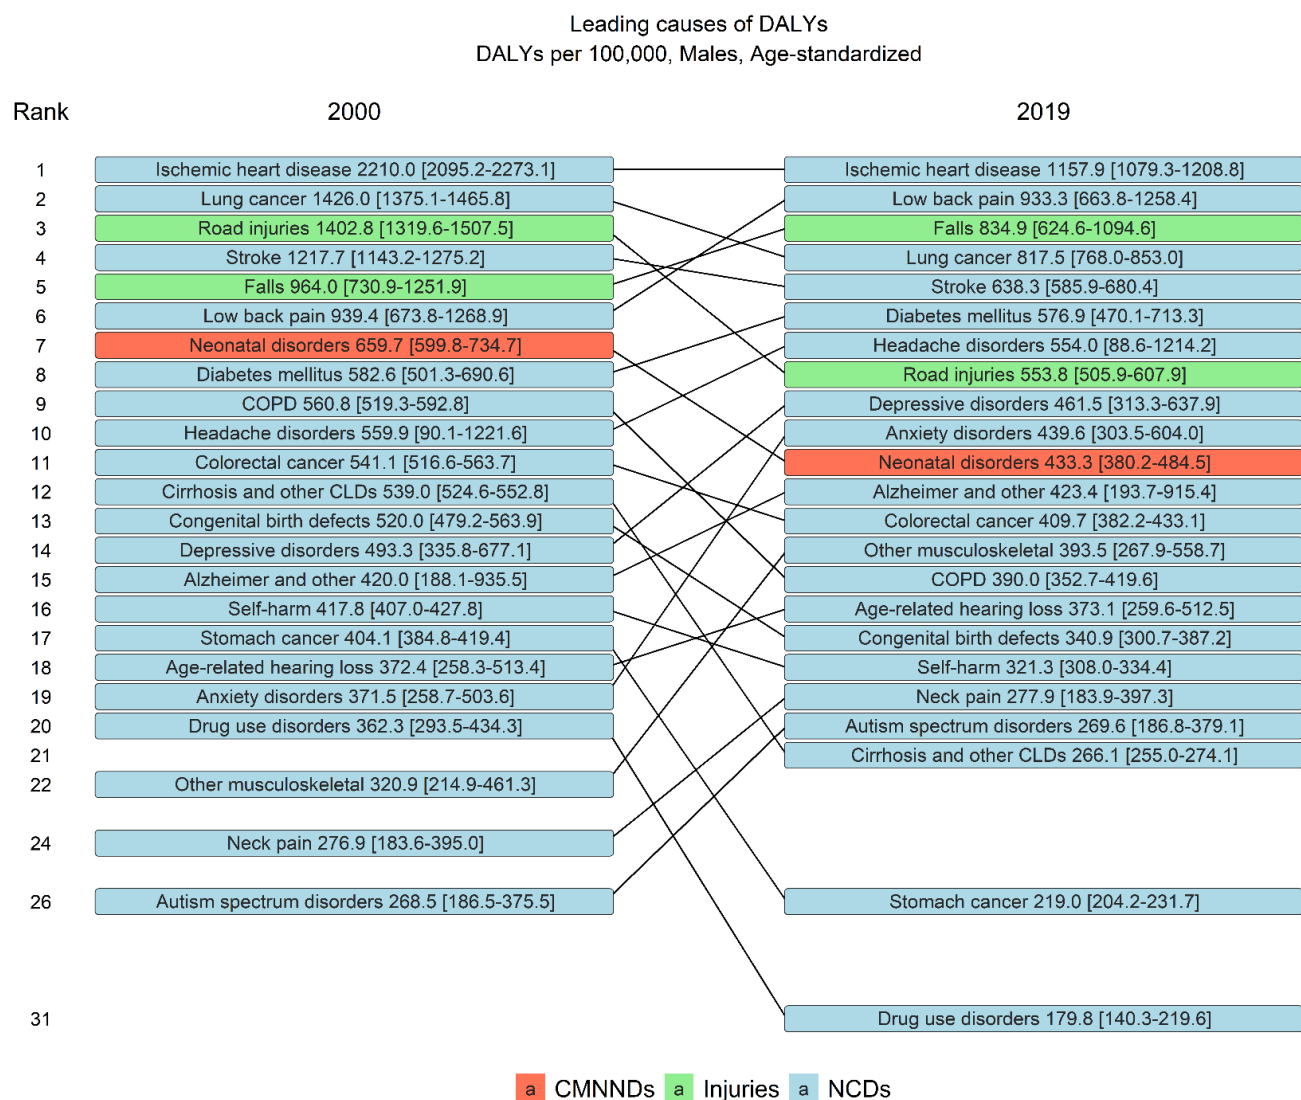

Abbreviations: COPD: Chronic Obstructive Pulmonary Disease; CLDs: Chronic Liver Diseases; CMNNDs: Communicable, Maternal, Neonatal and Nutritional Diseases; NCDs: Non-Communicable Diseases.

Figure S22b. Leading causes of age-standardised Disability-Adjusted Life-Years (DALYs) in Italy in 2000 and 2019 – Females.

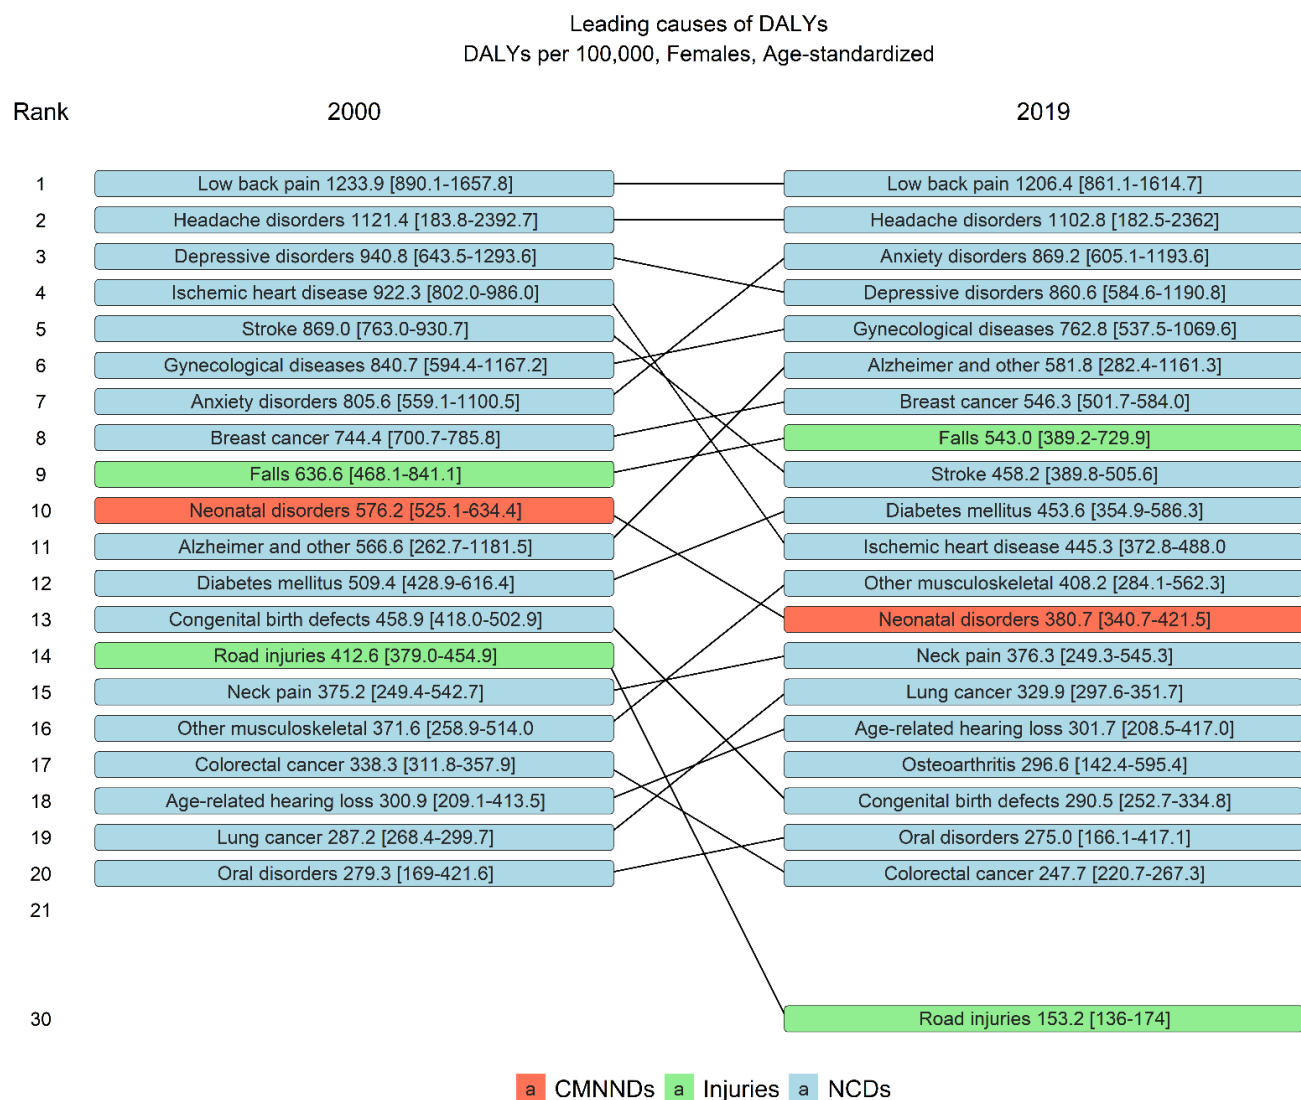

Abbreviations: CMNNDs: Communicable, Maternal, Neonatal and Nutritional Diseases; NCDs: Non-Communicable Diseases.

Figure S23. Ten leading causes of age-standardised Disability-Adjusted Life-Years (DALYs) in 2019 in Italy and in the five macro-regions. Rate are expressed per 100,000 people.

| Italy     |                        |                       |                          |                          | North-West |                        |                       |                          |                          |
|-----------|------------------------|-----------------------|--------------------------|--------------------------|------------|------------------------|-----------------------|--------------------------|--------------------------|
| Rank 2019 | Cause                  | DALY rate (95% UI)    | Change from 2000 to 2019 | Change from 2019 to 2021 | Rank 2019  | Cause                  | DALY rate (95% UI)    | Change from 2000 to 2019 | Change from 2019 to 2021 |
| 1         | Low back pain          | 1074.1 (765.3-1443.7) | 1.9%                     | 0.8%                     | 1          | Low back pain          | 1083.2 (774.3-1457.5) | -1.8%                    | 0.7%                     |
| 2         | Headache disorders     | 826.6 (135.7-1770.0)  | -1.8%                    | -4.6%                    | 2          | Headache disorders     | 841.8 (139.5-1812.5)  | -1.7%                    | -4.6%                    |
| 3         | Ischemic heart disease | 768.9 (692.7-816.5)   | -48.6%                   | -3.0%                    | 3          | Falls                  | 723.5 (524.9-968.9)   | -16.5%                   | -1.1%                    |
| 4         | Falls                  | 688.9 (503.8-914.5)   | -14.5%                   | -0.9%                    | 4          | Ischemic heart disease | 702.2 (629.5-749.8)   | -51.1%                   | -4.6%                    |
| 5         | Depressive disorders   | 661.1 (453.0-911.4)   | -8.3%                    | 23.1%                    | 5          | Anxiety disorders      | 657.4 (456.3-895.6)   | 11.4%                    | 25.1%                    |
| 6         | Anxiety disorders      | 653.5 (453.5-893.2)   | 10.7%                    | 24.6%                    | 6          | Depressive disorders   | 606.7 (418.7-836.9)   | -9.5%                    | 24.3%                    |
| 7         | Lung cancer            | 552.0 (514.3-575.7)   | -30.8%                   | -3.7%                    | 7          | Lung cancer            | 565.5 (521.0-602.0)   | -34.8%                   | -3.9%                    |
| 8         | Stroke                 | 539.6 (476.5-584.0)   | -16.9%                   | -2.8%                    | 8          | Alzheimer and other    | 526.2 (251.3-1069.9)  | 0.8%                     | -2.8%                    |
| 9         | Alzheimer and other    | 521.1 (248.5-1064.0)  | 1.3%                     | -2.6%                    | 9          | Stroke                 | 526.1 (461.0-575.0)   | -46.9%                   | -3.9%                    |
| 10        | Diabetes mellitus      | 510.3 (410.1-642.1)   | -6.3%                    | 3.0%                     | 10         | Other musculoskeletal  | 405.2 (280.0-564.3)   | 17.7%                    | 3.1%                     |

  

| North-East |                        |                       |                          |                          | Center    |                        |                       |                          |                          |
|------------|------------------------|-----------------------|--------------------------|--------------------------|-----------|------------------------|-----------------------|--------------------------|--------------------------|
| Rank 2019  | Cause                  | DALY rate (95% UI)    | Change from 2000 to 2019 | Change from 2019 to 2021 | Rank 2019 | Cause                  | DALY rate (95% UI)    | Change from 2000 to 2019 | Change from 2019 to 2021 |
| 1          | Low back pain          | 1088.1 (774.9-1456.8) | -1.8%                    | 0.7%                     | 1         | Low back pain          | 1069.5 [764.2-1440.6] | -1.7%                    | 1.2%                     |
| 2          | Headache disorders     | 840.4 (135.3-1808.8)  | -1.5%                    | -4.6%                    | 2         | Headache disorders     | 825.6 [136.7-1768.6]  | -1.8%                    | 23.0%                    |
| 3          | Depressive disorders   | 803.7 (545.5-1116.6)  | -3.9%                    | 22.1%                    | 3         | Ischemic heart disease | 759.7 [683.8-808.1]   | -49.6%                   | -2.8%                    |
| 4          | Falls                  | 725.8 (526.5-972.8)   | -12.4%                   | -0.9%                    | 4         | Depressive disorders   | 680.7 [463.4-934]     | -10.7%                   | 23.0%                    |
| 5          | Ischemic heart disease | 663.8 (589.6-710.4)   | -53.8%                   | -5.4%                    | 5         | Falls                  | 677.1 [498.7-884.2]   | -16.1%                   | -0.7%                    |
| 6          | Anxiety disorders      | 655.7 (456.7-899.7)   | 11.7%                    | 22.7%                    | 6         | Anxiety disorders      | 662.1 [457.4-910.5]   | 8.2%                     | 24.0%                    |
| 7          | Alzheimer and other    | 536.2 (261.0-1086.5)  | 0.1%                     | -2.5%                    | 7         | Lung cancer            | 566.5 [523.9-600.5]   | -28.0%                   | -4.0%                    |
| 8          | Lung cancer            | 507.3 (466.3-537.5)   | -38.4%                   | -7.6%                    | 8         | Stroke                 | 522.1 [463.9-564.6]   | -47.1%                   | -3.0%                    |
| 9          | Diabetes mellitus      | 466.0 (368.4-593.4)   | 5.8%                     | 3.6%                     | 9         | Alzheimer and other    | 492.1 [235.3-1003.6]  | 2.7%                     | -2.9%                    |
| 10         | Stroke                 | 447.2 (389.1-487.7)   | -44.4%                   | -4.3%                    | 10        | Diabetes mellitus      | 467.5 [372.5-595.8]   | -6.3%                    | 2.8%                     |

  

| South     |                        |                       |                          |                          | Islands   |                        |                       |                          |                          |
|-----------|------------------------|-----------------------|--------------------------|--------------------------|-----------|------------------------|-----------------------|--------------------------|--------------------------|
| Rank 2019 | Cause                  | DALY rate (95% UI)    | Change from 2000 to 2019 | Change from 2019 to 2021 | Rank 2019 | Cause                  | DALY rate (95% UI)    | Change from 2000 to 2019 | Change from 2019 to 2021 |
| 1         | Low back pain          | 1096.3 [789.9-1470.3] | -1.9%                    | 0.7%                     | 1         | Low back pain          | 1087.7 [782.7-1465.1] | -2.1%                    | 0.6%                     |
| 2         | Ischemic heart disease | 932.2 [679.2-1246.2]  | -42.2%                   | -1.2%                    | 2         | Ischemic heart disease | 908.6 [649.3-1223.4]  | -45.1%                   | -0.6%                    |
| 3         | Headache disorders     | 819.7 [134.9-1765.3]  | -2.1%                    | -4.9%                    | 3         | Diabetes mellitus      | 823.9 [137.5-1767.9]  | -4.4%                    | 3.4%                     |
| 4         | Falls                  | 656.6 [575.4-712.8]   | -8.7%                    | -0.7%                    | 4         | Headache disorders     | 659.2 [567.3-717.7]   | -2.1%                    | -4.9%                    |
| 5         | Anxiety disorders      | 655.1 [455.9-889.2]   | 11.0%                    | 25.0%                    | 5         | Stroke                 | 656.3 [459.8-894.6]   | -49.0%                   | -1.0%                    |
| 6         | Diabetes mellitus      | 602.8 [410.6-825.7]   | -10.3%                   | 3.2%                     | 6         | Depressive disorders   | 605.8 [408.9-833.7]   | -8.5%                    | 23.5%                    |
| 7         | Depressive disorders   | 494.7 [243.5-989.1]   | -9.7%                    | 22.5%                    | 7         | Anxiety disorders      | 506.2 [245.7-1024]    | 10.0%                    | 26.5%                    |
| 8         | Stroke                 | 444.9 [400.5-491.4]   | -49.1%                   | -1.5%                    | 8         | Alzheimer and other    | 474.2 [425.9-520.3]   | 1.4%                     | -2.9%                    |
| 9         | Lung cancer            | 433.7 [377.5-477.6]   | -24.5%                   | -1.4%                    | 9         | Lung cancer            | 420.8 [326.6-550.1]   | -20.6%                   | -1.0%                    |
| 10        | Alzheimer and other    | 405.7 [285.0-570.7]   | 2.1%                     | -2.1%                    | 10        | Falls                  | 378.4 [267.0-535.3]   | -23.1%                   | -1.0%                    |

NCDs CMNNDs Injuries

Change 2000: DALY rate change (%) from 2000 to 2019; Change 2021: DALY rate change (%) from 2019 to 2021. Abbreviations: NCDs: Non-Communicable Diseases; CMNNDs: Communicable, Maternal, Neonatal, Nutritional Disorders.

Table S5. Ten leading causes of all-age Disability-Adjusted Life-Years (DALYs) in 2019 by region.

| Region                     | Rank (2019) | Cause                    | DALYs per 100000 [95% UI] | Change 2000 (%) | Change 2021 (%) |
|----------------------------|-------------|--------------------------|---------------------------|-----------------|-----------------|
| Piemonte - North-West      | 1           | Ischemic heart disease   | 1992.8 [1731.2-2154.7]    | -29.4           | 0.4             |
|                            | 2           | Stroke                   | 1854.5 [1577.8-2041]      | -23.9           | 0.2             |
|                            | 3           | Alzheimer and other      | 1844.5 [871.3-3762.8]     | 10.3            | -0.6            |
|                            | 4           | Low back pain            | 1646.6 [1163.5-2199]      | 4.5             | 1.9             |
|                            | 5           | Lung cancer              | 1332.2 [1204-1445.5]      | 7.5             | 23.0            |
|                            | 6           | Falls                    | 1096.9 [849.9-1392.3]     | -6.5            | 22.2            |
|                            | 7           | Diabetes mellitus        | 962.9 [797.7-1192.4]      | -14.0           | 14.9            |
|                            | 8           | COPD                     | 926.1 [808.3-1015.6]      | 3.8             | 8.4             |
|                            | 9           | Headache disorders       | 842.1 [173.6-1767]        | -5.3            | 11.5            |
|                            | 10          | Colorectal cancer        | 815.6 [713.6-917.5]       | -4.2            | 6.5             |
| Valle d'Aosta - North-West | 1           | Ischemic heart disease   | 2010.4 [1726.6-2209.3]    | -32.8           | 1.6             |
|                            | 2           | Alzheimer and other      | 1686.2 [792.8-3459]       | -19.8           | -0.4            |
|                            | 3           | Low back pain            | 1603.3 [1147.1-2157.7]    | 5.2             | 2.2             |
|                            | 4           | Stroke                   | 1549.3 [1280.6-1746.3]    | 2.3             | 2.6             |
|                            | 5           | Falls                    | 1423.2 [1110.2-1804.7]    | -4.8            | 7.4             |
|                            | 6           | Lung cancer              | 1173.6 [1026.1-1329.6]    | 2.2             | 22.7            |
|                            | 7           | Diabetes mellitus        | 942.1 [753.8-1179.6]      | -9.4            | 24.5            |
|                            | 8           | COPD                     | 911.3 [787.3-1004.2]      | 1.7             | 10.1            |
|                            | 9           | Headache disorders       | 844.4 [173.1-1760.9]      | -1.0            | 9.9             |
|                            | 10          | Age-related hearing loss | 730 [516.6-994.1]         | -13.3           | 15.5            |

| Region                  | Rank (2019) | Cause                    | DALYs per 100000 [95% UI] | Change 2000 (%) | Change 2021 (%) |
|-------------------------|-------------|--------------------------|---------------------------|-----------------|-----------------|
| Lombardia - North-West  | 1           | Ischemic heart disease   | 1770.4 [1509.8-1925.2]    | -34.4           | -1.1            |
|                         | 2           | Alzheimer and other      | 1710.9 [806.8-3423.6]     | 3.4             | 1.9             |
|                         | 3           | Low back pain            | 1554.1 [1103-2068.8]      | 1.9             | 11.4            |
|                         | 4           | Stroke                   | 1296.1 [1085.3-1432.1]    | -12.6           | 22.3            |
|                         | 5           | Falls                    | 1279.6 [957.2-1658.5]     | -0.7            | 0.6             |
|                         | 6           | Lung cancer              | 1231.8 [1113-1333.8]      | 15.3            | 4.3             |
|                         | 7           | Headache disorders       | 880.1 [173.6-1873.2]      | -11.3           | 38.2            |
|                         | 8           | Depressive disorders     | 724.9 [499.6-992.9]       | -23.0           | 17.9            |
|                         | 9           | COPD                     | 714.8 [622.3-789.8]       | -11.3           | 18.8            |
|                         | 10          | Age-related hearing loss | 700.7 [500.1-963.9]       | -8.1            | 16.3            |
| AP Bolzano - North-East | 1           | Ischemic heart disease   | 1543.9 [1320-1695.5]      | -37.0           | 53.4            |
|                         | 2           | Low back pain            | 1506.2 [1078.8-2010.6]    | 7.7             | 5.2             |
|                         | 3           | Falls                    | 1453.7 [1084-1892.9]      | 4.1             | 5.7             |
|                         | 4           | Alzheimer and other      | 1418 [691.3-2846.8]       | 5.5             | 4.3             |
|                         | 5           | Stroke                   | 1048.8 [890.2-1161.2]     | -1.1            | 36.6            |
|                         | 6           | Lung cancer              | 850.8 [758.8-942.8]       | -11.3           | 29.1            |
|                         | 7           | Headache disorders       | 847.6 [163.1-1794.5]      | -4.5            | -4.5            |
|                         | 8           | Depressive disorders     | 705.2 [488.7-958.9]       | -17.6           | 13.9            |
|                         | 9           | Diabetes mellitus        | 687.2 [539.8-879.6]       | -10.5           | 16.9            |
|                         | 10          | Anxiety disorders        | 675.4 [460.9-907.4]       | -2.0            | 16.6            |
| AP Trento - North-East  | 1           | Ischemic heart disease   | 1827.1 [1500.7-2022.2]    | -42.7           | 9.8             |
|                         | 2           | Alzheimer and other      | 1697.1 [808-3393.8]       | 15.6            | 9.3             |
|                         | 3           | Low back pain            | 1546.6 [1102.6-2076.4]    | 7.7             | 8.0             |
|                         | 4           | Falls                    | 1457.8 [1090.6-1910.7]    | 10.9            | 8.5             |
|                         | 5           | Stroke                   | 1020.1 [855.1-1133.7]     | -21.6           | 44.0            |
|                         | 6           | Lung cancer              | 991.8 [871.4-1092.6]      | -3.1            | 4.5             |
|                         | 7           | Headache disorders       | 845.7 [170-1790.1]        | -8.2            | 11.4            |
|                         | 8           | Diabetes mellitus        | 841.3 [675.1-1071.6]      | -5.3            | 5.6             |
|                         | 9           | Depressive disorders     | 719.1 [496.3-980.5]       | -10.1           | 14.9            |
|                         | 10          | Age-related hearing loss | 694.5 [493.5-948]         | -11.9           | 15.7            |

| Region                             | Rank (2019) | Cause                    | DALYs per 100000 [95% UI] | Change 2000 (%) | Change 2021 (%) |
|------------------------------------|-------------|--------------------------|---------------------------|-----------------|-----------------|
| Veneto - North East                | 1           | Ischemic heart disease   | 1753 [1507.7-1908.6]      | -31.0           | 15.8            |
|                                    | 2           | Alzheimer and other      | 1640.2 [776-3359.5]       | 9.4             | 5.7             |
|                                    | 3           | Low back pain            | 1572 [1108.9-2101.9]      | 5.4             | 6.6             |
|                                    | 4           | Stroke                   | 1202.4 [1025.5-1323.9]    | -19.2           | 33.9            |
|                                    | 5           | Falls                    | 1143.3 [870.6-1470.5]     | -1.7            | 4.5             |
|                                    | 6           | Lung cancer              | 1062.7 [946.5-1155.2]     | -6.8            | 8.4             |
|                                    | 7           | Diabetes mellitus        | 1004.1 [808.6-1253]       | -4.4            | 6.4             |
|                                    | 8           | Depressive disorders     | 914.7 [614.7-1263.4]      | -4.5            | 15.1            |
|                                    | 9           | Headache disorders       | 851.7 [171.1-1791.2]      | -5.7            | 20.8            |
|                                    | 10          | Age-related hearing loss | 703.3 [495.3-956.6]       | -7.0            | 14.8            |
| Friuli-Venezia Giulia - North-East | 1           | Ischemic heart disease   | 2156.8 [1858.8-2361.8]    | -37.1           | 58.1            |
|                                    | 2           | Alzheimer and other      | 1911.6 [907.6-3897.3]     | 1.5             | 10.6            |
|                                    | 3           | Low back pain            | 1644.8 [1184.8-2220.3]    | -0.3            | 15.0            |
|                                    | 4           | Stroke                   | 1499.8 [1254-1661]        | -5.1            | 11.7            |
|                                    | 5           | Falls                    | 1278.5 [982.1-1630.7]     | -5.1            | 15.5            |
|                                    | 6           | Lung cancer              | 1225.6 [1100-1335.8]      | -4.7            | 4.9             |
|                                    | 7           | Diabetes mellitus        | 1041.1 [841.8-1273.2]     | -6.7            | 13.9            |
|                                    | 8           | Osteoarthritis           | 871.4 [424.7-1750]        | -12.1           | 26.1            |
|                                    | 9           | Headache disorders       | 835.1 [172.9-1747.3]      | -9.5            | 6.7             |
|                                    | 10          | COPD                     | 826.5 [716.7-912.8]       | -7.0            | 4.1             |
| Liguria - North-West               | 1           | Ischemic heart disease   | 2347 [1987.6-2559.4]      | -38.7           | -1.9            |
|                                    | 2           | Alzheimer and other      | 2245 [1054.2-4576.6]      | -8.9            | 0.6             |
|                                    | 3           | Stroke                   | 1933 [1638.4-2140.1]      | 0.9             | -1.7            |
|                                    | 4           | Low back pain            | 1684.4 [1189.4-2251.3]    | 0.6             | 5.4             |
|                                    | 5           | Falls                    | 1623.7 [1246.7-2078.1]    | -1.4            | 5.4             |
|                                    | 6           | Lung cancer              | 1432.4 [1288.8-1569.6]    | -6.0            | 13.5            |
|                                    | 7           | Diabetes mellitus        | 1135.2 [937.4-1382.8]     | 0.3             | 22.6            |
|                                    | 8           | COPD                     | 964.1 [839.6-1065.5]      | -13.8           | 22.1            |
|                                    | 9           | Colorectal cancer        | 931.6 [811.3-1038.6]      | 5.0             | 3.2             |
|                                    | 10          | Age-related hearing loss | 850.3 [609.9-1156.8]      | -2.0            | 6.6             |

| Region                      | Rank (2019) | Cause                    | DALYs per 100000 [95% UI] | Change 2000 (%) | Change 2021 (%) |
|-----------------------------|-------------|--------------------------|---------------------------|-----------------|-----------------|
| Emilia-Romagna - North-East | 1           | Alzheimer and other      | 2046.9 [993.9-4102.6]     | -39.0           | 10.8            |
|                             | 2           | Ischemic heart disease   | 1833.8 [1550.3-2025.1]    | -3.4            | 10.9            |
|                             | 3           | Low back pain            | 1596.4 [1130.8-2128]      | -1.5            | 12.9            |
|                             | 4           | Stroke                   | 1329.6 [1095.8-1479.9]    | -16.3           | 22.2            |
|                             | 5           | Falls                    | 1306.5 [991.8-1686.1]     | -15.1           | 2.9             |
|                             | 6           | Lung cancer              | 1205.2 [1064.7-1325.7]    | -10.4           | 8.8             |
|                             | 7           | Depressive disorders     | 1140.7 [785.2-1551.9]     | -8.5            | 14.8            |
|                             | 8           | Diabetes mellitus        | 995.5 [809.4-1225]        | -16.2           | 15.3            |
|                             | 9           | Headache disorders       | 896.6 [174.6-1913.8]      | -4.5            | 15.1            |
|                             | 10          | COPD                     | 764.3 [651.2-847.4]       | -14.6           | 12.9            |
| Toscana - Centre            | 1           | Ischemic heart disease   | 1983.9 [1728.1-2139.6]    | -38.0           | 0.1             |
|                             | 2           | Stroke                   | 1771.4 [1511.6-1939.3]    | -27.6           | -0.4            |
|                             | 3           | Alzheimer and other      | 1745 [821.5-3565.7]       | 11.0            | 1.1             |
|                             | 4           | Low back pain            | 1616.3 [1144-2163.9]      | 6.0             | 8.0             |
|                             | 5           | Lung cancer              | 1271.8 [1156.9-1389.4]    | 3.9             | 29.6            |
|                             | 6           | Falls                    | 1127.7 [885-1433.4]       | -4.4            | 10.9            |
|                             | 7           | Diabetes mellitus        | 1044.6 [858.6-1294.5]     | -9.1            | 11.9            |
|                             | 8           | Depressive disorders     | 1011 [690.3-1381.7]       | 6.7             | 12.6            |
|                             | 9           | Headache disorders       | 843.1 [174.2-1769.2]      | -9.5            | 28.9            |
|                             | 10          | COPD                     | 840.6 [738.9-922.3]       | -8.0            | 9.2             |
| Umbria - Centre             | 1           | Ischemic heart disease   | 2280 [1900-2499]          | -35.8           | -2.0            |
|                             | 2           | Alzheimer and other      | 1927.7 [887.7-3940.1]     | -16.3           | -1.4            |
|                             | 3           | Low back pain            | 1611.3 [1146.2-2152.2]    | 2.2             | 2.2             |
|                             | 4           | Stroke                   | 1602.6 [1352.6-1776.3]    | 25.8            | -2.3            |
|                             | 5           | Falls                    | 1292.1 [985-1671.6]       | 3.9             | 21.0            |
|                             | 6           | Lung cancer              | 1091.6 [969.7-1206.9]     | -10.7           | 18.9            |
|                             | 7           | Diabetes mellitus        | 908.9 [753.4-1105.4]      | -6.6            | 14.8            |
|                             | 8           | Headache disorders       | 848.3 [173.6-1777.4]      | -3.8            | 9.4             |
|                             | 9           | COPD                     | 834.5 [715.5-924.2]       | -5.0            | 2.0             |
|                             | 10          | Age-related hearing loss | 762.1 [542-1037.1]        | -12.7           | 8.2             |

| Region          | Rank (2019) | Cause                      | DALYs per 100000 [95% UI] | Change 2000 (%) | Change 2021 (%) |
|-----------------|-------------|----------------------------|---------------------------|-----------------|-----------------|
| Marche – Centre | 1           | Ischemic heart disease     | 2155.5 [1798.2-2380.5]    | -26.2           | 1.6             |
|                 | 2           | Alzheimer and other        | 1869.5 [876.4-3820.7]     | -11.4           | 1.3             |
|                 | 3           | Low back pain              | 1455.1 [1012.9-2035.1]    | 4.1             | 18.7            |
|                 | 4           | Stroke                     | 1449.9 [1216.3-1624.2]    | 12.4            | 5.8             |
|                 | 5           | Falls                      | 1122.3 [870.6-1418.5]     | -9.6            | 31.5            |
|                 | 6           | Lung cancer                | 1013.7 [890.6-1123.3]     | -11.1           | 12.1            |
|                 | 7           | Headache disorders         | 852.2 [174.7-1785.1]      | -18.0           | 17.5            |
|                 | 8           | Diabetes mellitus          | 845 [693.3-1046.3]        | -4.6            | 4.7             |
|                 | 9           | COPD                       | 772.7 [658.8-858.3]       | -7.0            | 10.7            |
|                 | 10          | Age-related hearing loss   | 755.5 [540.3-1030.2]      | -6.4            | 7.2             |
| Lazio - Centre  | 1           | Ischemic heart disease     | 2059.6 [1791-2237]        | -28.7           | 2.5             |
|                 | 2           | Low back pain              | 1560 [1114.7-2087.1]      | -7.6            | 9.4             |
|                 | 3           | Alzheimer and other        | 1492.1 [718-3060.3]       | -0.1            | 7.2             |
|                 | 4           | Falls                      | 1328.8 [1011.7-1717.5]    | -9.5            | 14.1            |
|                 | 5           | Lung cancer                | 1326.2 [1193.7-1435.4]    | 0.4             | 1.9             |
|                 | 6           | Stroke                     | 1258.9 [1093.5-1375.9]    | 27.3            | 5.5             |
|                 | 7           | Diabetes mellitus          | 1048.8 [858.5-1288.6]     | 6.3             | 22.4            |
|                 | 8           | Headache disorders         | 862.9 [174.8-1815.8]      | -5.3            | 28.3            |
|                 | 9           | COPD                       | 748.6 [654.6-820.6]       | -16.1           | 16.3            |
|                 | 10          | Depressive disorders       | 735.5 [503.7-1016.3]      | -9.2            | 12.2            |
| Abruzzo - South | 1           | Ischemic heart disease     | 2453.1 [2112.3-2670.1]    | -6.4            | 1.3             |
|                 | 2           | Alzheimer and other        | 1726.1 [821.9-3530.2]     | -11.6           | 3.5             |
|                 | 3           | Low back pain              | 1581.8 [1124.9-2106]      | 6.8             | 10.3            |
|                 | 4           | Stroke                     | 1442.5 [1231.9-1589.6]    | 5.3             | 12.2            |
|                 | 5           | Falls                      | 1352.2 [1045.5-1726.3]    | 21.8            | 7.6             |
|                 | 6           | Diabetes mellitus          | 1110.6 [914-1355.8]       | 1.8             | 23.2            |
|                 | 7           | Lung cancer                | 986.1 [885.1-1079]        | -1.3            | 18.5            |
|                 | 8           | COPD                       | 828.5 [720.2-908.1]       | -14.7           | 18.6            |
|                 | 9           | Headache disorders         | 804.9 [158.6-1705.1]      | -5.3            | 4.8             |
|                 | 10          | Hypertensive heart disease | 778.8 [632.5-866.8]       | -1.9            | 6.7             |

| Region           | Rank (2019) | Cause                      | DALYs per 100000 [95% UI] | Change 2000 (%) | Change 2021 (%) |
|------------------|-------------|----------------------------|---------------------------|-----------------|-----------------|
| Molise – South   | 1           | Ischemic heart disease     | 2883.9 [2516.2-3168.4]    | -13.3           | -2.3            |
|                  | 2           | Alzheimer and other        | 1849.2 [870-3876]         | -21.6           | 20.6            |
|                  | 3           | Stroke                     | 1792.1 [1567.1-1965.9]    | 21.6            | 3.3             |
|                  | 4           | Low back pain              | 1590.7 [1128.4-2109.6]    | 12.6            | 10.3            |
|                  | 5           | Falls                      | 1472.4 [1134.2-1891.1]    | 29.0            | 10.4            |
|                  | 6           | Diabetes mellitus          | 1347.4 [1120.4-1645.7]    | 21.4            | 9.5             |
|                  | 7           | Lung cancer                | 1057.6 [944.5-1165.6]     | 9.2             | 31.7            |
|                  | 8           | Hypertensive heart disease | 928 [779.1-1035]          | -1.6            | 9.5             |
|                  | 9           | COPD                       | 888.4 [779.5-983.5]       | 1.3             | 2.7             |
|                  | 10          | Headache disorders         | 851.5 [173.1-1778.6]      | 8.1             | 3.0             |
| Campania - South | 1           | Ischemic heart disease     | 2226.1 [1985-2390.4]      | -17.4           | 3.6             |
|                  | 2           | Stroke                     | 1486.4 [1305.5-1612.5]    | -25.7           | 29.4            |
|                  | 3           | Low back pain              | 1462.1 [1028.8-1959.4]    | 12.6            | 4.9             |
|                  | 4           | Diabetes mellitus          | 1296.9 [1092.7-1563.7]    | 3.6             | 15.8            |
|                  | 5           | Lung cancer                | 1266.6 [1160.6-1366.4]    | 14.7            | 8.3             |
|                  | 6           | Alzheimer and other        | 1212.5 [570.7-2523.8]     | 34.9            | 7.7             |
|                  | 7           | Falls                      | 1037.7 [782.7-1341.2]     | 15.5            | 20.9            |
|                  | 8           | Headache disorders         | 877.7 [171.2-1837.2]      | 2.5             | 20.4            |
|                  | 9           | COPD                       | 852.1 [762.6-928]         | 12.5            | 3.3             |
|                  | 10          | Depressive disorders       | 718.3 [492.1-986.2]       | -2.0            | 18.7            |
| Puglia - South   | 1           | Ischemic heart disease     | 1820.2 [1579-1976.9]      | -14.4           | 27.2            |
|                  | 2           | Low back pain              | 1517.3 [1073.6-2035.8]    | 2.8             | 25.9            |
|                  | 3           | Alzheimer and other        | 1484.5 [690.1-3075.2]     | 10.0            | 4.7             |
|                  | 4           | Falls                      | 1151.8 [880.9-1485.6]     | 6.9             | 34.0            |
|                  | 5           | Stroke                     | 1132.9 [970.3-1244.9]     | 10.1            | 7.9             |
|                  | 6           | Diabetes mellitus          | 1129.4 [936.2-1365.7]     | 15.2            | 4.9             |
|                  | 7           | Lung cancer                | 1002.9 [906-1086.3]       | 11.0            | 17.6            |
|                  | 8           | Headache disorders         | 868.4 [172.4-1829.5]      | -3.1            | 19.2            |
|                  | 9           | COPD                       | 859.2 [749.1-936]         | 4.3             | 4.3             |
|                  | 10          | Hypertensive heart disease | 830.6 [677.4-924.1]       | 7.2             | 4.5             |

| Region             | Rank (2019) | Cause                      | DALYs per 100000 [95% UI] | Change 2000 (%) | Change 2021 (%) |
|--------------------|-------------|----------------------------|---------------------------|-----------------|-----------------|
| Basilicata – South | 1           | Ischemic heart disease     | 2242.9 [1962.5-2448.2]    | -12.3           | 2.2             |
|                    | 2           | Alzheimer and other        | 1706.4 [807-3519.9]       | -16.9           | 1.0             |
|                    | 3           | Stroke                     | 1593.4 [1386.7-1763.2]    | 13.1            | 1.3             |
|                    | 4           | Low back pain              | 1569.5 [1114.3-2089.8]    | 47.1            | 2.6             |
|                    | 5           | Diabetes mellitus          | 1357.4 [1126.4-1645.2]    | 32.1            | 5.5             |
|                    | 6           | Hypertensive heart disease | 1156 [957.4-1290]         | 23.9            | 4.2             |
|                    | 7           | Falls                      | 1153.7 [896.9-1469.3]     | 27.4            | 1.6             |
|                    | 8           | COPD                       | 1032.5 [898.2-1138.8]     | 15.6            | 13.5            |
|                    | 9           | Lung cancer                | 950.6 [862.7-1043.8]      | 6.8             | 9.9             |
|                    | 10          | Headache disorders         | 860.4 [178.2-1815]        | 9.1             | 12.9            |
| Calabria - South   | 1           | Ischemic heart disease     | 2180.1 [1926.1-2350]      | -12.1           | 2.0             |
|                    | 2           | Stroke                     | 1541.1 [1339.1-1676.8]    | -20.5           | 8.5             |
|                    | 3           | Low back pain              | 1496.3 [1051.1-2009.7]    | 10.8            | 4.6             |
|                    | 4           | Alzheimer and other        | 1477.4 [687.8-3044.2]     | 39.8            | 3.7             |
|                    | 5           | Diabetes mellitus          | 1355.8 [1126.2-1650.1]    | 29.4            | 9.4             |
|                    | 6           | Falls                      | 1131.7 [876.7-1437.7]     | 26.7            | 26.2            |
|                    | 7           | Hypertensive heart disease | 1024.4 [858.4-1133.8]     | 16.2            | 12.0            |
|                    | 8           | Lung cancer                | 967.9 [888.2-1045.8]      | 15.1            | 7.3             |
|                    | 9           | Headache disorders         | 867 [171.3-1826.4]        | 12.5            | 12.7            |
|                    | 10          | COPD                       | 821.3 [728.3-898]         | 9.7             | 3.0             |
| Sicilia - Islands  | 1           | Ischemic heart disease     | 2036.7 [1784.8-2194.2]    | -20.7           | 3.6             |
|                    | 2           | Diabetes mellitus          | 1712.4 [1381.7-2108]      | -26.1           | 20.2            |
|                    | 3           | Stroke                     | 1711.1 [1469.7-1872.8]    | 21.8            | 5.6             |
|                    | 4           | Alzheimer and other        | 1631.5 [771.8-3333.1]     | 20.6            | 8.3             |
|                    | 5           | Low back pain              | 1484.4 [1048.1-1999.7]    | 40.3            | 11.6            |
|                    | 6           | Lung cancer                | 1108.4 [1008.2-1198.4]    | 10.3            | 37.1            |
|                    | 7           | Falls                      | 905.6 [713.8-1140.2]      | -4.0            | 25.4            |
|                    | 8           | COPD                       | 849.7 [741.3-926.8]       | 2.9             | 8.5             |
|                    | 9           | Hypertensive heart disease | 834.1 [694.9-930.7]       | 8.4             | 5.1             |
|                    | 10          | Headache disorders         | 804.8 [171.6-1689]        | 6.5             | 7.9             |

| Region             | Rank (2019) | Cause                  | DALYs per 100000 [95% UI] | Change 2000 (%) | Change 2021 (%) |
|--------------------|-------------|------------------------|---------------------------|-----------------|-----------------|
| Sardegna – Islands | 1           | Ischemic heart disease | 1983.9 [1728.1-2139.6]    | -23.4           | 5.4             |
|                    | 2           | Stroke                 | 1771.4 [1511.6-1939.3]    | -3.4            | 3.1             |
|                    | 3           | Alzheimer and other    | 1745 [821.5-3565.7]       | 14.5            | 2.7             |
|                    | 4           | Low back pain          | 1616.3 [1144-2163.9]      | 19.2            | 5.6             |
|                    | 5           | Lung cancer            | 1271.8 [1156.9-1389.4]    | 22.5            | 10.1            |
|                    | 6           | Falls                  | 1127.7 [885-1433.4]       | 24.7            | 3.2             |
|                    | 7           | Diabetes mellitus      | 1044.6 [858.6-1294.5]     | 13.8            | 12.4            |
|                    | 8           | Depressive disorders   | 1011 [690.3-1381.7]       | -6.8            | 34.0            |
|                    | 9           | Headache disorders     | 843.1 [174.2-1769.2]      | -1.4            | 12.7            |
|                    | 10          | COPD                   | 840.6 [738.9-922.3]       | -1.5            | 3.7             |

*Change 2000: DALY rate change (%) from 2000 to 2019; Change 2021: DALY rate change (%) from 2019 to 2021.*

*Abbreviations: COPD: Chronic obstructive pulmonary disease; UI: Uncertainty Interval.*

Table S6. Ten leading causes of all-age Disability-Adjusted Life-Years (DALYs) in 2019 by region.

| Region                     | Rank (2019) | Cause                  | DALYs per 100000 [95% UI] | Change 2000 (%) | Change 2021 (%) |
|----------------------------|-------------|------------------------|---------------------------|-----------------|-----------------|
| Piemonte - North-West      | 1           | Low back pain          | 1101.6 [776-1471.5]       | -18.1           | 0.6             |
|                            | 2           | Headache disorders     | 826.5 [135.8-1773.9]      | -26.2           | 0.6             |
|                            | 3           | Ischemic heart disease | 720.4 [643.7-772]         | -35.5           | 9.1             |
|                            | 4           | Anxiety disorders      | 658.3 [453-896.4]         | -39.1           | 16.0            |
|                            | 5           | Depressive disorders   | 608 [414.2-845.3]         | -29.5           | 21.1            |
|                            | 6           | Stroke                 | 598 [523.3-654.1]         | -28.8           | 17.0            |
|                            | 7           | Falls                  | 578.6 [432.7-756.2]       | -24.6           | 0.5             |
|                            | 8           | Lung cancer            | 568.1 [517.4-613.7]       | -15.3           | 0.8             |
|                            | 9           | Alzheimer and other    | 508.8 [244.5-1034.4]      | -18.9           | 9.5             |
|                            | 10          | Neonatal disorders     | 437.3 [369.4-511.6]       | -25.9           | 12.1            |
| Valle d'Aosta - North-West | 1           | Low back pain          | 1091 [784.4-1460.6]       | -30.2           | 0.6             |
|                            | 2           | Headache disorders     | 825.6 [136.1-1771]        | -25.7           | -2.8            |
|                            | 3           | Falls                  | 793.3 [599-1028.4]        | -26.9           | -1.0            |
|                            | 4           | Ischemic heart disease | 765.5 [682.8-837.6]       | -28.2           | 2.6             |
|                            | 5           | Anxiety disorders      | 657.5 [452-903.1]         | -34.6           | 13.2            |
|                            | 6           | Depressive disorders   | 606.3 [414.8-828.4]       | -27.9           | 21.8            |
|                            | 7           | Stroke                 | 534.2 [459.2-596.5]       | -35.9           | 32.9            |
|                            | 8           | Lung cancer            | 529.6 [463.9-602.5]       | -20.5           | -0.7            |
|                            | 9           | Alzheimer and other    | 497.5 [236.4-1034.1]      | -15.2           | 2.2             |
|                            | 10          | Diabetes mellitus      | 448.3 [349.1-572.7]       | -19.0           | 7.1             |

| Region                  | Rank (2019) | Cause                   | DALYs per 100000 [95% UI] | Change 2000 (%) | Change 2021 (%) |
|-------------------------|-------------|-------------------------|---------------------------|-----------------|-----------------|
| Lombardia - North-West  | 1           | Low back pain           | 1075.2 [764-1447.2]       | -26.8           | 0.7             |
|                         | 2           | Headache disorders      | 850.9 [142.5-1830.1]      | -22.4           | -2.4            |
|                         | 3           | Falls                   | 775.7 [558.4-1049.1]      | -17.8           | 5.8             |
|                         | 4           | Ischemic heart disease  | 692.2 [611.7-742.1]       | -23.2           | 18.2            |
|                         | 5           | Anxiety disorders       | 656.9 [454.1-893]         | -26.7           | 16.7            |
|                         | 6           | Depressive disorders    | 606.2 [418.5-832.5]       | -30.2           | 23.9            |
|                         | 7           | Lung cancer             | 564.8 [516.8-609]         | -34.9           | 16.0            |
|                         | 8           | Alzheimer and other     | 539.1 [257.7-1089.9]      | -19.6           | 0.1             |
|                         | 9           | Stroke                  | 486.3 [422.1-532.7]       | -17.6           | 8.1             |
|                         | 10          | Other musculoskeletal   | 395.6 [270.1-553.4]       | -27.4           | 17.3            |
| AP Bolzano - North-East | 1           | Low back pain           | 1096.3 [789.9-1470.3]     | -27.1           | 15.8            |
|                         | 2           | Falls                   | 932.2 [679.2-1246.2]      | -16.5           | 18.2            |
|                         | 3           | Headache disorders      | 819.7 [134.9-1765.3]      | -23.4           | 13.4            |
|                         | 4           | Ischemic heart disease  | 656.6 [575.4-712.8]       | -35.6           | 19.6            |
|                         | 5           | Anxiety disorders       | 655.1 [455.9-889.2]       | -21.4           | 19.0            |
|                         | 6           | Depressive disorders    | 602.8 [410.6-825.7]       | -26.3           | 17.9            |
|                         | 7           | Alzheimer and other     | 494.7 [243.5-989.1]       | -25.8           | 28.3            |
|                         | 8           | Lung cancer             | 444.9 [400.5-491.4]       | -29.4           | 8.5             |
|                         | 9           | Stroke                  | 433.7 [377.5-477.6]       | -26.1           | -1.1            |
|                         | 10          | Gynaecological diseases | 405.7 [285-570.7]         | -28.9           | -0.7            |
| AP Trento - North-East  | 1           | Low back pain           | 1087.7 [782.7-1465.1]     | -34.9           | 0.8             |
|                         | 2           | Falls                   | 908.6 [649.3-1223.4]      | -18.0           | 9.0             |
|                         | 3           | Headache disorders      | 823.9 [137.5-1767.9]      | -10.9           | 9.4             |
|                         | 4           | Ischemic heart disease  | 659.2 [567.3-717.7]       | -23.3           | 18.9            |
|                         | 5           | Anxiety disorders       | 656.3 [459.8-894.6]       | -21.5           | 19.0            |
|                         | 6           | Depressive disorders    | 605.8 [408.9-833.7]       | -21.0           | 19.6            |
|                         | 7           | Alzheimer and other     | 506.2 [245.7-1024]        | -32.3           | 25.9            |
|                         | 8           | Lung cancer             | 474.2 [425.9-520.3]       | -29.2           | 3.4             |
|                         | 9           | Diabetes mellitus       | 420.8 [326.6-550.1]       | -28.6           | 3.4             |
|                         | 10          | Gynaecological diseases | 378.4 [267.1-535.3]       | -22.7           | 13.0            |

| Region                             | Rank (2019) | Cause                  | DALYs per 100000 [95% UI] | Change 2000 (%) | Change 2021 (%) |
|------------------------------------|-------------|------------------------|---------------------------|-----------------|-----------------|
| Veneto - North East                | 1           | Low back pain          | 1083.3 [767.5-1452.2]     | -19.5           | 0.8             |
|                                    | 2           | Headache disorders     | 823.5 [135.7-1760.2]      | -25.6           | 16.8            |
|                                    | 3           | Depressive disorders   | 762.4 [518-1063]          | -29.3           | 20.1            |
|                                    | 4           | Falls                  | 677.3 [493-901.4]         | -20.6           | 17.5            |
|                                    | 5           | Ischemic heart disease | 666 [589.4-717.2]         | -20.3           | 17.5            |
|                                    | 6           | Anxiety disorders      | 656 [456.8-895.5]         | -17.6           | 1.9             |
|                                    | 7           | Alzheimer and other    | 516.1 [245.2-1068.5]      | -35.2           | 21.6            |
|                                    | 8           | Lung cancer            | 483.3 [437.6-523.8]       | -38.5           | 4.8             |
|                                    | 9           | Diabetes mellitus      | 479 [375.2-610.4]         | -18.4           | 4.3             |
|                                    | 10          | Stroke                 | 443.7 [388.3-484]         | -12.9           | 1.2             |
| Friuli-Venezia Giulia - North-East | 1           | Low back pain          | 1087.5 [773-1465.5]       | -28.3           | 30.1            |
|                                    | 2           | Headache disorders     | 822.6 [136.5-1768.3]      | -25.8           | 33.0            |
|                                    | 3           | Ischemic heart disease | 719.2 [637.9-779.8]       | -31.6           | 15.0            |
|                                    | 4           | Falls                  | 680.2 [504-893.7]         | -19.1           | 15.0            |
|                                    | 5           | Anxiety disorders      | 656.3 [453.5-901.6]       | -21.4           | 15.0            |
|                                    | 6           | Depressive disorders   | 604.8 [413.6-829.7]       | -27.2           | 11.9            |
|                                    | 7           | Lung cancer            | 515.8 [465.9-560.1]       | -36.6           | 30.5            |
|                                    | 8           | Alzheimer and other    | 502 [239.1-1029.1]        | -24.7           | -4.0            |
|                                    | 9           | Stroke                 | 469.9 [406.9-515.4]       | -20.1           | 2.5             |
|                                    | 10          | Diabetes mellitus      | 463.4 [363.8-586]         | -5.9            | 3.3             |
| Liguria - North-West               | 1           | Low back pain          | 1082.7 [781.1-1445.1]     | -27.7           | 0.6             |
|                                    | 2           | Headache disorders     | 825.9 [134.9-1771.6]      | -25.0           | -0.5            |
|                                    | 3           | Falls                  | 774.6 [569.9-1017.4]      | -17.6           | 1.4             |
|                                    | 4           | Ischemic heart disease | 706.9 [626.5-760.3]       | -24.4           | 7.8             |
|                                    | 5           | Anxiety disorders      | 658 [452.7-886.3]         | -25.9           | 13.7            |
|                                    | 6           | Depressive disorders   | 606.6 [414.6-831.5]       | -27.7           | 20.3            |
|                                    | 7           | Lung cancer            | 571 [520.6-622.6]         | -31.2           | 17.5            |
|                                    | 8           | Stroke                 | 549.8 [485.9-602.5]       | -18.0           | -1.8            |
|                                    | 9           | Alzheimer and other    | 508.9 [241.2-1031.9]      | -20.5           | 3.7             |
|                                    | 10          | Diabetes mellitus      | 451.3 [361.9-567.6]       | -23.7           | 10.2            |

| Region                      | Rank (2019) | Cause                  | DALYs per 100000 [95% UI] | Change 2000 (%) | Change 2021 (%) |
|-----------------------------|-------------|------------------------|---------------------------|-----------------|-----------------|
| Emilia-Romagna - North-East | 1           | Low back pain          | 1092.8 [780.2-1474]       | -25.9           | 7.6             |
|                             | 2           | Depressive disorders   | 950 [644.9-1304.4]        | -20.7           | 15.7            |
|                             | 3           | Headache disorders     | 868.1 [136.1-1879.7]      | -22.1           | 16.4            |
|                             | 4           | Falls                  | 744.3 [539.4-1003.2]      | -23.8           | 11.9            |
|                             | 5           | Anxiety disorders      | 655.1 [451.8-892.7]       | -25.9           | 24.3            |
|                             | 6           | Ischemic heart disease | 648.5 [572.9-704.1]       | -22.0           | 14.1            |
|                             | 7           | Alzheimer and other    | 573.5 [283.4-1152.1]      | -30.1           | 7.2             |
|                             | 8           | Lung cancer            | 541.9 [488.4-589.2]       | -33.4           | 3.2             |
|                             | 9           | Diabetes mellitus      | 467.6 [366.9-595]         | -20.3           | 7.0             |
|                             | 10          | Stroke                 | 455.2 [392.1-501]         | -21.7           | 5.4             |
| Toscana - Centre            | 1           | Low back pain          | 1082 [777.3-1443.1]       | -21.6           | 0.6             |
|                             | 2           | Depressive disorders   | 837.6 [566.4-1145.2]      | -23.9           | 22.0            |
|                             | 3           | Headache disorders     | 825.6 [134.7-1763]        | -19.8           | 11.8            |
|                             | 4           | Anxiety disorders      | 758.2 [527.8-1042.2]      | -19.7           | 3.6             |
|                             | 5           | Ischemic heart disease | 663.4 [595.3-708.8]       | -25.0           | 16.4            |
|                             | 6           | Stroke                 | 560.6 [491.3-608.8]       | -33.0           | 14.1            |
|                             | 7           | Falls                  | 554.6 [416.1-718.7]       | -27.4           | -0.8            |
|                             | 8           | Lung cancer            | 546.1 [502.4-593.5]       | -25.2           | -0.9            |
|                             | 9           | Alzheimer and other    | 470 [225.2-963.2]         | -32.8           | 10.8            |
|                             | 10          | Diabetes mellitus      | 456.1 [361.2-580]         | -21.2           | 2.7             |
| Umbria - Centre             | 1           | Low back pain          | 1090.7 [781.9-1468.8]     | -31.1           | 0.8             |
|                             | 2           | Headache disorders     | 827.8 [137.2-1774.2]      | -25.4           | -2.0            |
|                             | 3           | Ischemic heart disease | 754.7 [661.6-816.2]       | -24.8           | 4.4             |
|                             | 4           | Falls                  | 708.7 [517.3-945.9]       | -23.2           | 4.3             |
|                             | 5           | Anxiety disorders      | 659.1 [455.4-904.3]       | -21.4           | 8.2             |
|                             | 6           | Depressive disorders   | 608.8 [411.8-837.3]       | -23.2           | 15.8            |
|                             | 7           | Stroke                 | 511.7 [447.2-561.3]       | -23.7           | 36.1            |
|                             | 8           | Alzheimer and other    | 508.8 [239.1-1042.8]      | -17.8           | -4.3            |
|                             | 9           | Lung cancer            | 482.4 [434.6-531.6]       | -18.1           | 0.6             |
|                             | 10          | Diabetes mellitus      | 402.1 [322.7-506.4]       | -26.7           | 11.4            |

| Region          | Rank (2019) | Cause                  | DALYs per 100000 [95% UI] | Change 2000 (%) | Change 2021 (%) |
|-----------------|-------------|------------------------|---------------------------|-----------------|-----------------|
| Marche - Centre | 1           | Low back pain          | 980.8 [680.3-1363.9]      | -26.9           | 3.9             |
|                 | 2           | Headache disorders     | 829.6 [137-1778.7]        | -16.9           | -4.9            |
|                 | 3           | Ischemic heart disease | 725.2 [631.7-791.5]       | -26.3           | 4.2             |
|                 | 4           | Depressive disorders   | 609.6 [418-839.7]         | -35.3           | 22.3            |
|                 | 5           | Falls                  | 589.4 [434.3-772.2]       | -30.0           | 19.4            |
|                 | 6           | Alzheimer and other    | 507.9 [240.7-1045.2]      | -28.2           | 15.0            |
|                 | 7           | Stroke                 | 471 [408.6-520]           | -30.0           | 21.6            |
|                 | 8           | Anxiety disorders      | 456.5 [305.7-636.5]       | -31.9           | 9.2             |
|                 | 9           | Lung cancer            | 448.3 [400.5-493.8]       | -10.5           | 3.0             |
|                 | 10          | Other musculoskeletal  | 410.8 [279.5-578.9]       | -12.7           | 4.2             |
| Lazio - Centre  | 1           | Low back pain          | 1082.2 [773.7-1451.7]     | -34.0           | 0.9             |
|                 | 2           | Ischemic heart disease | 839.8 [754.3-903.3]       | -23.8           | -0.4            |
|                 | 3           | Headache disorders     | 824.2 [136.9-1767.6]      | -13.6           | 0.2             |
|                 | 4           | Falls                  | 777.5 [568.9-1027.3]      | -15.8           | 5.8             |
|                 | 5           | Anxiety disorders      | 657.5 [452.2-904.7]       | -28.6           | 19.1            |
|                 | 6           | Lung cancer            | 628.7 [573.5-677.4]       | -27.9           | 22.7            |
|                 | 7           | Depressive disorders   | 611.8 [418.8-839.7]       | -27.5           | 24.5            |
|                 | 8           | Diabetes mellitus      | 511.8 [411.9-640.2]       | -24.8           | 19.0            |
|                 | 9           | Stroke                 | 506.3 [450.1-547.6]       | -22.7           | 4.2             |
|                 | 10          | Alzheimer and other    | 501.6 [241.8-1026.4]      | -15.3           | -1.5            |
| Abruzzo - South | 1           | Low back pain          | 1076.4 [771-1435.5]       | -19.1           | 0.8             |
|                 | 2           | Ischemic heart disease | 888.6 [793.7-958]         | -19.0           | -3.2            |
|                 | 3           | Headache disorders     | 780.8 [125.3-1709.7]      | -18.4           | 0.1             |
|                 | 4           | Falls                  | 745.9 [552.7-982.4]       | -19.0           | 4.7             |
|                 | 5           | Anxiety disorders      | 656.7 [454.3-901]         | -27.2           | 13.5            |
|                 | 6           | Depressive disorders   | 605.9 [411.7-834.5]       | -25.2           | 21.8            |
|                 | 7           | Stroke                 | 514.3 [452.2-562.6]       | -23.3           | 38.8            |
|                 | 8           | Diabetes mellitus      | 511 [408.9-639.7]         | -21.9           | 2.9             |
|                 | 9           | Alzheimer and other    | 501.9 [241.4-1016.2]      | -17.4           | -0.8            |
|                 | 10          | Lung cancer            | 451.6 [410.2-492.2]       | -23.5           | 8.6             |

| Region           | Rank (2019) | Cause                  | DALYs per 100000 [95% UI] | Change 2000 (%) | Change 2021 (%) |
|------------------|-------------|------------------------|---------------------------|-----------------|-----------------|
| Molise - South   | 1           | Low back pain          | 1070.7 [760.9-1434.4]     | -35.3           | 0.6             |
|                  | 2           | Ischemic heart disease | 1009.9 [905.9-1098.7]     | -10.3           | -4.2            |
|                  | 3           | Headache disorders     | 820 [136.4-1746.1]        | -25.0           | 14.6            |
|                  | 4           | Falls                  | 806.9 [594.8-1066.9]      | -12.6           | 1.9             |
|                  | 5           | Anxiety disorders      | 654.4 [454.1-903.8]       | -29.1           | 20.9            |
|                  | 6           | Stroke                 | 624.5 [555-682.2]         | -25.4           | 24.8            |
|                  | 7           | Diabetes mellitus      | 606.9 [491.2-758.7]       | -9.1            | 23.3            |
|                  | 8           | Depressive disorders   | 602.5 [412.7-827.4]       | 0.4             | 1.9             |
|                  | 9           | Alzheimer and other    | 503 [238.8-1029.4]        | -14.6           | 16.4            |
|                  | 10          | Lung cancer            | 485.5 [435.5-533.4]       | -13.1           | -0.4            |
| Campania - South | 1           | Ischemic heart disease | 1087.6 [983.2-1162.9]     | -43.8           | -0.8            |
|                  | 2           | Low back pain          | 1065.4 [759.8-1426.4]     | -26.0           | 0.7             |
|                  | 3           | Headache disorders     | 825.2 [135.6-1758.7]      | -23.8           | 28.3            |
|                  | 4           | Stroke                 | 715.5 [639.8-772.3]       | -20.7           | 16.0            |
|                  | 5           | Diabetes mellitus      | 693.2 [575.1-850.3]       | -17.5           | 13.2            |
|                  | 6           | Falls                  | 688.5 [505.4-918.7]       | -13.2           | 8.4             |
|                  | 7           | Lung cancer            | 684.6 [629.9-737.3]       | -5.8            | 3.6             |
|                  | 8           | Anxiety disorders      | 659 [461.2-907.3]         | -5.8            | 7.2             |
|                  | 9           | Depressive disorders   | 606.2 [413.1-830.7]       | -11.5           | 12.8            |
|                  | 10          | Alzheimer and other    | 508.2 [237.8-1061.1]      | -24.4           | 33.6            |
| Puglia - South   | 1           | Low back pain          | 1058.4 [753.2-1424]       | -22.0           | 7.5             |
|                  | 2           | Headache disorders     | 825.7 [135.7-1761]        | -23.7           | 28.8            |
|                  | 3           | Ischemic heart disease | 748.7 [661.5-804.5]       | -20.2           | 11.1            |
|                  | 4           | Falls                  | 700.1 [511.7-939.3]       | -17.0           | 12.2            |
|                  | 5           | Anxiety disorders      | 657.1 [457.5-894.5]       | -20.8           | 15.0            |
|                  | 6           | Depressive disorders   | 607.6 [412.4-832.5]       | -22.8           | 22.8            |
|                  | 7           | Diabetes mellitus      | 549.6 [445.1-681.7]       | -23.5           | 27.0            |
|                  | 8           | Alzheimer and other    | 510.8 [239.4-1060.5]      | -27.7           | 13.0            |
|                  | 9           | Lung cancer            | 481.5 [441.7-519]         | -28.5           | 4.6             |
|                  | 10          | Stroke                 | 465.9 [410.6-507.8]       | -27.9           | 2.4             |

| Region             | Rank (2019) | Cause                  | DALYs per 100000 [95% UI] | Change 2000 (%) | Change 2021 (%) |
|--------------------|-------------|------------------------|---------------------------|-----------------|-----------------|
| Basilicata - South | 1           | Low back pain          | 1075.6 [767.1-1451.9]     | -26.6           | 0.7             |
|                    | 2           | Ischemic heart disease | 856.1 [773.4-925.3]       | -25.9           | -1.7            |
|                    | 3           | Headache disorders     | 821.1 [136.9-1759.8]      | -24.8           | -3.4            |
|                    | 4           | Anxiety disorders      | 653.6 [456.1-897]         | -25.5           | 19.5            |
|                    | 5           | Falls                  | 632.8 [476.7-825.4]       | -24.5           | 12.4            |
|                    | 6           | Diabetes mellitus      | 627.8 [510.4-777.1]       | -14.1           | 2.7             |
|                    | 7           | Depressive disorders   | 604.8 [415.2-839.1]       | -14.7           | 2.7             |
|                    | 8           | Stroke                 | 583.6 [519.2-640]         | -12.9           | -0.7            |
|                    | 9           | Neonatal disorders     | 515.9 [443.7-592.2]       | -19.6           | 9.5             |
|                    | 10          | Alzheimer and other    | 506.1 [241.3-1054.2]      | -14.0           | -2.7            |
| Calabria - South   | 1           | Low back pain          | 1054.1 [751.7-1405.7]     | -30.4           | 0.6             |
|                    | 2           | Ischemic heart disease | 919.6 [833.9-982.4]       | -20.6           | -1.9            |
|                    | 3           | Headache disorders     | 826 [136.6-1769.8]        | -23.2           | 1.8             |
|                    | 4           | Falls                  | 674.6 [500.1-882.5]       | -19.8           | 20.7            |
|                    | 5           | Diabetes mellitus      | 666.4 [546-823.5]         | -16.1           | 17.8            |
|                    | 6           | Anxiety disorders      | 659.1 [458.9-908.5]       | -15.0           | 11.6            |
|                    | 7           | Stroke                 | 623 [555.1-674.2]         | -9.8            | 10.0            |
|                    | 8           | Depressive disorders   | 607.4 [416.7-838.1]       | -10.1           | 10.1            |
|                    | 9           | Neonatal disorders     | 585.2 [530.4-641.1]       | -12.8           | 4.3             |
|                    | 10          | Alzheimer and other    | 497.5 [235.1-1017.9]      | -16.0           | 18.7            |
| Sicilia - Islands  | 1           | Low back pain          | 1054.8 [742.2-1418.2]     | -33.1           | 0.6             |
|                    | 2           | Ischemic heart disease | 898.4 [808.9-960.7]       | -35.8           | 14.9            |
|                    | 3           | Diabetes mellitus      | 867.4 [682.1-1080.8]      | -19.5           | 3.0             |
|                    | 4           | Headache disorders     | 768.7 [137.7-1622.4]      | -14.4           | 15.9            |
|                    | 5           | Stroke                 | 718.7 [631.2-781.1]       | -14.4           | 16.7            |
|                    | 6           | Anxiety disorders      | 655.8 [457.7-903.6]       | -16.3           | 16.0            |
|                    | 7           | Depressive disorders   | 605.7 [410.3-834.2]       | -15.3           | 20.8            |
|                    | 8           | Alzheimer and other    | 585.5 [277.9-1191]        | -15.7           | 21.5            |
|                    | 9           | Lung cancer            | 555.9 [509.3-597.3]       | -18.8           | 2.5             |
|                    | 10          | Falls                  | 527.2 [400.7-675.2]       | -21.7           | 4.4             |

| Region             | Rank (2019) | Cause                  | DALYs per 100000 [95% UI] | Change 2000 (%) | Change 2021 (%) |
|--------------------|-------------|------------------------|---------------------------|-----------------|-----------------|
| Sardegna - Islands | 1           | Low back pain          | 1071.6 [756.2-1429.4]     | -22.6           | 0.6             |
|                    | 2           | Headache disorders     | 821.7 [136.6-1759]        | -24.7           | -2.1            |
|                    | 3           | Depressive disorders   | 684.1 [468.3-942.6]       | -32.5           | 14.3            |
|                    | 4           | Ischemic heart disease | 679.7 [608.8-733.4]       | -23.7           | -0.3            |
|                    | 5           | Diabetes mellitus      | 613.4 [474.8-785.7]       | -27.0           | 6.5             |
|                    | 6           | Falls                  | 612.8 [460.8-795.2]       | -19.8           | -1.0            |
|                    | 7           | Lung cancer            | 552 [504.5-599.9]         | -25.7           | 5.7             |
|                    | 8           | Stroke                 | 515 [455-562.6]           | -27.4           | 11.8            |
|                    | 9           | Alzheimer and other    | 506.9 [245-1031]          | -21.6           | 7.7             |
|                    | 10          | Anxiety disorders      | 488.4 [330-673]           | -6.5            | 5.0             |

Change 2000: DALY rate change (%) from 2000 to 2019; Change 2021: DALY rate change (%) from 2019 to 2021.

Abbreviations: UI: Uncertainty Interval.

Figure S24. Percentage of family health expenditure over total health expenditure in Italy by region and macro-region from 2000 to 2019.

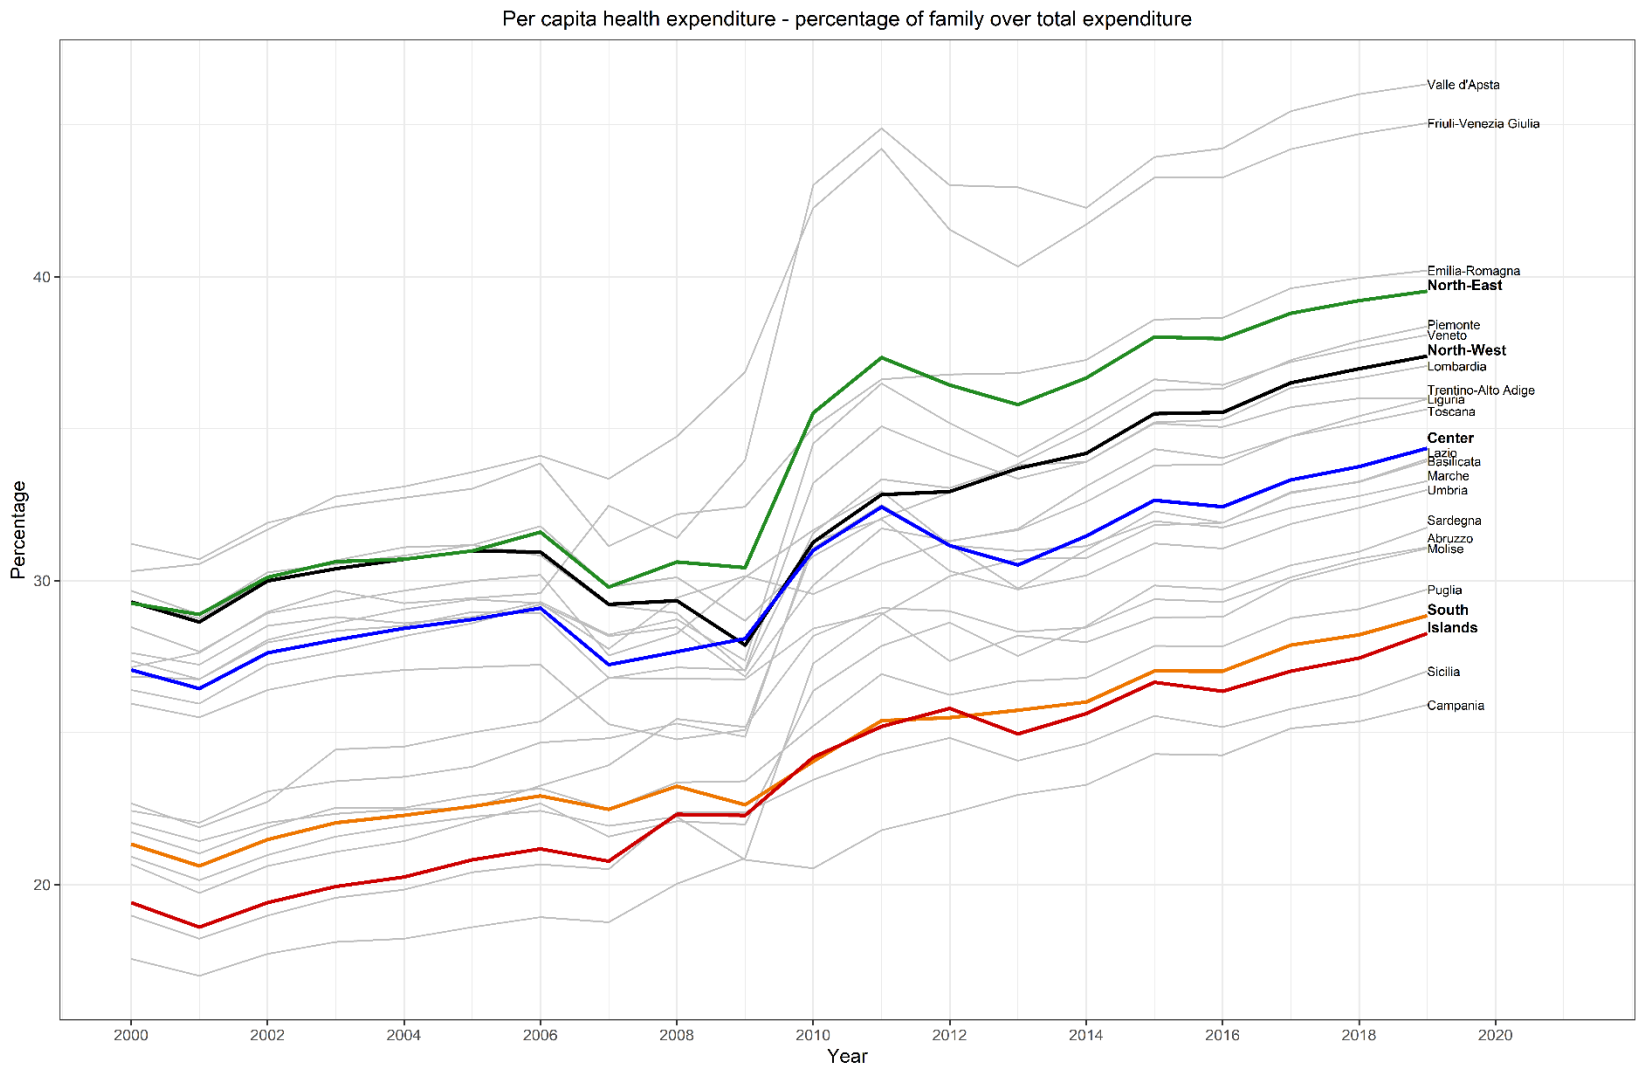

Supplement: mmc1 [file mmc2.pdf › mmc2.pdf]
